# Supplementary material for: Genome-Wide Analysis of bHLH Gene Family in Loropetalum chinense var. Rubrum: Identification, Classification, Evolution, and Expression Pattern Diversity on Cultivations
Source: Preprints.org preprint supplement (doi:10.20944/preprints202306.1460.v1), 2023-06-20
Supplement: Supplementary file 1 [file Supplementary Tables1-13.xlsx]

## Sheet: TableS1
Table S1. Gene accession number of all LcbHLH genes.
Gene ID	Sequence ID	Accession	Release Date
LcbHLH1	augustus76721.t1	OR074748	06/06/2023
LcbHLH2	augustus76710.t1	OR074749	06/06/2023
LcbHLH3	augustus43111.t1	OR074750	06/06/2023
LcbHLH4	augustus40183.t1	OR074751	06/06/2023
LcbHLH5	augustus29859.t1	OR074752	06/06/2023
LcbHLH6	augustus28367.t1	OR074753	06/06/2023
LcbHLH7	augustus18983.t1	OR074754	06/06/2023
LcbHLH8	augustus39314.t1	OR074755	06/06/2023
LcbHLH9	augustus53257.t1	OR074756	06/06/2023
LcbHLH10	augustus54053.t1	OR074757	06/06/2023
LcbHLH11	augustus14060.t1	OR074758	06/06/2023
LcbHLH12	augustus78482.t1	OR074759	06/06/2023
LcbHLH13	augustus12785.t1	OR074760	06/06/2023
LcbHLH14	augustus54245.t1	OR074761	06/06/2023
LcbHLH15	augustus23985.t1	OR074762	06/06/2023
LcbHLH16	augustus80973.t1	OR074763	06/06/2023
LcbHLH17	augustus47033.t1	OR074764	06/06/2023
LcbHLH18	augustus32790.t1	OR074765	06/06/2023
LcbHLH19	augustus35384.t1	OR074766	06/06/2023
LcbHLH20	augustus35499.t1	OR074767	06/06/2023
LcbHLH21	augustus45844.t1	OR074768	06/06/2023
LcbHLH22	augustus42512.t1	OR074769	06/06/2023
LcbHLH23	augustus20203.t1	OR074770	06/06/2023
LcbHLH24	augustus45506.t1	OR074771	06/06/2023
LcbHLH25	augustus42435.t1	OR074772	06/06/2023
LcbHLH26	augustus42426.t1	OR074773	06/06/2023
LcbHLH27	augustus33921.t1	OR074774	06/06/2023
LcbHLH28	augustus65717.t1	OR074775	06/06/2023
LcbHLH29	augustus01443.t1	OR074776	06/06/2023
LcbHLH30	augustus46073.t1	OR074777	06/06/2023
LcbHLH31	augustus39910.t1	OR074778	06/06/2023
LcbHLH32	augustus46440.t1	OR074779	06/06/2023
LcbHLH33	augustus42542.t1	OR074780	06/06/2023
LcbHLH34	augustus37928.t1	OR074781	06/06/2023
LcbHLH35	augustus06837.t1	OR074782	06/06/2023
LcbHLH36	augustus06851.t1	OR074783	06/06/2023
LcbHLH37	augustus62670.t1	OR074784	06/06/2023
LcbHLH38	augustus52598.t1	OR074785	06/06/2023
LcbHLH39	augustus43753.t1	OR074786	06/06/2023
LcbHLH40	augustus06310.t1	OR074787	06/06/2023
LcbHLH41	augustus53990.t1	OR074788	06/06/2023
LcbHLH42	augustus58654.t1	OR074789	06/06/2023
LcbHLH43	augustus15216.t1	OR074790	06/06/2023
LcbHLH44	augustus52899.t1	OR074791	06/06/2023
LcbHLH45	augustus21364.t1	OR074792	06/06/2023
LcbHLH46	augustus53045.t1	OR074793	06/06/2023
LcbHLH47	augustus49806.t1	OR074794	06/06/2023
LcbHLH48	augustus49852.t1	OR074795	06/06/2023
LcbHLH49	augustus49854.t1	OR074796	06/06/2023
LcbHLH50	augustus49858.t1	OR074797	06/06/2023
LcbHLH51	augustus49886.t1	OR074798	06/06/2023
LcbHLH52	augustus47107.t1	OR074799	06/06/2023
LcbHLH53	augustus01310.t1	OR074800	06/06/2023
LcbHLH54	augustus47163.t1	OR074801	06/06/2023
LcbHLH55	augustus28719.t1	OR074802	06/06/2023
LcbHLH56	augustus75831.t1	OR074803	06/06/2023
LcbHLH57	augustus41181.t1	OR074804	06/06/2023
LcbHLH58	augustus65044.t1	OR074805	06/06/2023
LcbHLH59	augustus75369.t1	OR074806	06/06/2023
LcbHLH60	augustus28781.t1	OR074807	06/06/2023
LcbHLH61	augustus16781.t1	OR074808	06/06/2023
LcbHLH62	augustus33503.t1	OR074809	06/06/2023
LcbHLH63	augustus29885.t1	OR074810	06/06/2023
LcbHLH64	augustus15868.t1	OR074811	06/06/2023
LcbHLH65	augustus42164.t1	OR074812	06/06/2023
LcbHLH66	augustus78823.t1	OR074813	06/06/2023
LcbHLH67	augustus63720.t1	OR074814	06/06/2023
LcbHLH68	augustus36073.t1	OR074815	06/06/2023
LcbHLH69	augustus07124.t1	OR074816	06/06/2023
LcbHLH70	augustus50926.t1	OR074817	06/06/2023
LcbHLH71	augustus13421.t1	OR074818	06/06/2023
LcbHLH72	augustus43507.t1	OR074819	06/06/2023
LcbHLH73	augustus58374.t1	OR074820	06/06/2023
LcbHLH74	augustus54870.t1	OR074821	06/06/2023
LcbHLH75	augustus31122.t1	OR074822	06/06/2023
LcbHLH76	augustus81140.t1	OR074823	06/06/2023
LcbHLH77	augustus14971.t1	OR074824	06/06/2023
LcbHLH78	augustus14977.t1	OR074825	06/06/2023
LcbHLH79	augustus58790.t1	OR074826	06/06/2023
LcbHLH80	augustus58797.t1	OR074827	06/06/2023
LcbHLH81	augustus70275.t1	OR074828	06/06/2023
LcbHLH82	augustus64941.t1	OR074829	06/06/2023
LcbHLH83	augustus57608.t1	OR074830	06/06/2023
LcbHLH84	augustus59858.t1	OR074831	06/06/2023
LcbHLH85	augustus35063.t1	OR074832	06/06/2023
LcbHLH86	augustus35062.t1	OR074833	06/06/2023
LcbHLH87	augustus03943.t1	OR074834	06/06/2023
LcbHLH88	augustus03916.t1	OR074835	06/06/2023
LcbHLH89	augustus79213.t1	OR074836	06/06/2023
LcbHLH90	augustus77040.t1	OR074837	06/06/2023
LcbHLH91	augustus41360.t1	OR074838	06/06/2023
LcbHLH92	augustus57592.t1	OR074839	06/06/2023
LcbHLH93	augustus52522.t1	OR074840	06/06/2023
LcbHLH94	augustus52510.t1	OR074841	06/06/2023
LcbHLH95	augustus30854.t1	OR074842	06/06/2023
LcbHLH96	augustus79165.t1	OR074843	06/06/2023
LcbHLH97	augustus79115.t1	OR074844	06/06/2023
LcbHLH98	augustus79116.t1	OR074845	06/06/2023
LcbHLH99	augustus15274.t1	OR074846	06/06/2023
LcbHLH100	augustus20640.t1	OR074847	06/06/2023
LcbHLH101	augustus81095.t1	OR074848	06/06/2023
LcbHLH102	augustus54105.t1	OR074849	06/06/2023
LcbHLH103	augustus63159.t1	OR074850	06/06/2023
LcbHLH104	augustus31505.t1	OR074851	06/06/2023
LcbHLH105	augustus25250.t1	OR074852	06/06/2023
LcbHLH106	augustus69255.t1	OR074853	06/06/2023
LcbHLH107	augustus68067.t1	OR074854	06/06/2023
LcbHLH108	genewise18140.t1	OR074855	06/06/2023
LcbHLH109	augustus13827.t1	OR074856	06/06/2023
LcbHLH110	augustus59384.t1	OR074857	06/06/2023
LcbHLH111	augustus27056.t1	OR074858	06/06/2023
LcbHLH112	augustus02776.t1	OR074859	06/06/2023
LcbHLH113	augustus80065.t1	OR074860	06/06/2023
LcbHLH114	augustus62196.t1	OR074861	06/06/2023
LcbHLH115	augustus39568.t1	OR074862	06/06/2023
LcbHLH116	augustus43849.t1	OR074863	06/06/2023
LcbHLH117	augustus20678.t1	OR074864	06/06/2023
LcbHLH118	augustus81247.t1	OR074865	06/06/2023
LcbHLH119	augustus57375.t1	OR074866	06/06/2023
LcbHLH120	augustus03694.t1	OR074867	06/06/2023
LcbHLH121	augustus03692.t1	OR074868	06/06/2023
LcbHLH122	augustus03688.t1	OR074869	06/06/2023
LcbHLH123	augustus03686.t1	OR074870	06/06/2023
LcbHLH124	augustus03685.t1	OR074871	06/06/2023
LcbHLH125	augustus03682.t1	OR074872	06/06/2023
LcbHLH126	augustus39546.t1	OR074873	06/06/2023
LcbHLH127	augustus18480.t1	OR074874	06/06/2023
LcbHLH128	augustus17184.t1	OR074875	06/06/2023
LcbHLH129	augustus17182.t1	OR074876	06/06/2023
LcbHLH130	augustus41038.t1	OR074877	06/06/2023
LcbHLH131	augustus77488.t1	OR074878	06/06/2023
LcbHLH132	augustus29571.t1	OR074879	06/06/2023
LcbHLH133	augustus71441.t1	OR074880	06/06/2023
LcbHLH134	augustus38404.t1	OR074881	06/06/2023
LcbHLH135	augustus67444.t1	OR074882	06/06/2023
LcbHLH136	augustus45666.t1	OR074883	06/06/2023
LcbHLH137	augustus18444.t1	OR074884	06/06/2023
LcbHLH138	augustus65962.t1	OR074885	06/06/2023
LcbHLH139	augustus27934.t1	OR074886	06/06/2023
LcbHLH140	augustus21068.t1	OR074887	06/06/2023
LcbHLH141	augustus47244.t1	OR074888	06/06/2023
LcbHLH142	augustus25953.t1	OR074889	06/06/2023
LcbHLH143	augustus25954.t1	OR074890	06/06/2023
LcbHLH144	augustus32512.t1	OR074891	06/06/2023
LcbHLH145	augustus26166.t1	OR074892	06/06/2023
LcbHLH146	augustus18878.t1	OR074893	06/06/2023
LcbHLH147	augustus18860.t1	OR074894	06/06/2023
LcbHLH148	augustus16077.t1	OR074895	06/06/2023
LcbHLH149	augustus16061.t1	OR074896	06/06/2023
LcbHLH150	augustus32526.t1	OR074897	06/06/2023
LcbHLH151	augustus41669.t1	OR074898	06/06/2023
LcbHLH152	augustus27484.t1	OR074899	06/06/2023
LcbHLH153	augustus26524.t1	OR074900	06/06/2023
LcbHLH154	augustus26523.t1	OR074901	06/06/2023
LcbHLH155	augustus27472.t1	OR074902	06/06/2023
LcbHLH156	augustus67252.t1	OR074903	06/06/2023
LcbHLH157	augustus60390.t1	OR074904	06/06/2023
LcbHLH158	augustus44839.t1	OR074905	06/06/2023
LcbHLH159	augustus47877.t1	OR074906	06/06/2023
LcbHLH160	augustus47876.t1	OR074907	06/06/2023
LcbHLH161	augustus68183.t1	OR074908	06/06/2023
LcbHLH162	augustus07478.t1	OR074909	06/06/2023
LcbHLH163	augustus08232.t1	OR074910	06/06/2023
LcbHLH164	augustus74258.t1	OR074911	06/06/2023
LcbHLH165	augustus54215.t1	OR074912	06/06/2023

## Sheet: TableS2
Table S2. Physicochemical properties table
Gene	Gene ID	Molecular weight/kDa	Theoretical pI	The number of amino acid/aa	subcellular localization	Instability index	Aliphatic index	Grand average of hydropathicity(GRAVY)
LcbHLH1	augustus76721.t1	58902.2	7.33	541	nucleus	51.14	62.26	-0.579
LcbHLH2	augustus76710.t1	58902.2	7.33	541	nucleus	51.14	62.26	-0.579
LcbHLH3	augustus43111.t1	58993.3	6.91	542	nucleus	50.65	62.86	-0.576
LcbHLH4	augustus40183.t1	77592.9	5.79	698	nucleus	61.97	73.67	-0.587
LcbHLH5	augustus29859.t1	44488.6	7.66	392	cytoplasm	47.39	82.76	-0.601
LcbHLH6	augustus28367.t1	31743.8	5.69	299	nucleus	36.68	79.36	-0.37
LcbHLH7	augustus18983.t1	56805.1	5.74	513	nucleus	45.61	82.46	-0.405
LcbHLH8	augustus39314.t1	56821.1	5.74	513	nucleus	46.08	82.46	-0.413
LcbHLH9	augustus53257.t1	55261.3	5.65	506	nucleus	53.1	68.46	-0.657
LcbHLH10	augustus54053.t1	58086.6	5.5	531	nucleus	52.67	68.55	-0.631
LcbHLH11	augustus14060.t1	28247.4	5.7	260	nucleus	55.97	68.77	-0.606
LcbHLH12	augustus78482.t1	28233.4	5.7	260	nucleus	56.12	68.38	-0.615
LcbHLH13	augustus12785.t1	59559.8	5.56	551	nucleus	69.34	51.42	-0.66
LcbHLH14	augustus54245.t1	53535	5.58	497	nucleus	67.25	54.06	-0.638
LcbHLH15	augustus23985.t1	37778.7	7.05	338	nucleus	63.51	73.88	-0.488
LcbHLH16	augustus80973.t1	30956.3	6.31	270	nucleus	51.99	84.48	-0.383
LcbHLH17	augustus47033.t1	37129.1	8.86	332	nucleus	60	73.77	-0.507
LcbHLH18	augustus32790.t1	23883.7	8.53	217	nucleus	45.7	66.04	-0.693
LcbHLH19	augustus35384.t1	46010.3	5.23	404	nucleus	64.78	75.52	-0.73
LcbHLH20	augustus35499.t1	24946.1	5.92	219	nucleus	62.9	63.33	-0.861
LcbHLH21	augustus45844.t1	24946.1	5.92	219	nucleus	62.9	63.33	-0.861
LcbHLH22	augustus42512.t1	33651	5.79	315	nucleus	46.13	76.89	-0.319
LcbHLH23	augustus20203.t1	21260.6	6.9	190	cytoplasm	63.37	105.58	-0.102
LcbHLH24	augustus45506.t1	21485.9	7.61	192	cytoplasm	62.78	104.48	-0.126
LcbHLH25	augustus42435.t1	39714.7	8.22	355	nucleus	48.1	68.14	-0.619
LcbHLH26	augustus42426.t1	58894.9	5.27	539	nucleus	43.89	72.76	-0.533
LcbHLH27	augustus33921.t1	29940.1	5.52	278	nucleus	53.37	67.7	-0.662
LcbHLH28	augustus65717.t1	29940.1	5.52	278	nucleus	53.37	67.7	-0.662
LcbHLH29	augustus01443.t1	48499.5	8.8	437	nucleus	69.16	58.33	-0.7
LcbHLH30	augustus46073.t1	44606.3	8.86	403	nucleus	66.01	58.68	-0.646
LcbHLH31	augustus39910.t1	61373.2	7.32	559	nucleus	54.29	65.44	-0.778
LcbHLH32	augustus46440.t1	34365.9	6.26	312	nucleus	51.42	65.96	-0.756
LcbHLH33	augustus42542.t1	55980.7	5.05	512	nucleus	58.69	68.42	-0.515
LcbHLH34	augustus37928.t1	55105.8	5.03	504	nucleus	55.37	72.6	-0.441
LcbHLH35	augustus06837.t1	26427.9	5.62	241	nucleus	48.34	70.5	-0.578
LcbHLH36	augustus06851.t1	38375.8	6.26	342	nucleus	66.77	81.84	-0.344
LcbHLH37	augustus62670.t1	22261.3	6.53	202	cytoplasm	42.75	91.73	-0.321
LcbHLH38	augustus52598.t1	22251.3	6.53	202	cytoplasm	43.12	91.73	-0.317
LcbHLH39	augustus43753.t1	39263.6	9.14	361	nucleus	51.33	62.11	-0.57
LcbHLH40	augustus06310.t1	35083.1	6.27	319	nucleus	55.81	59.34	-0.912
LcbHLH41	augustus53990.t1	36799	6.21	330	nucleus	57.74	62.7	-0.937
LcbHLH42	augustus58654.t1	40851.5	7.19	362	nucleus	52.64	77.54	-0.477
LcbHLH43	augustus15216.t1	35305.2	8.88	315	nucleus	50.59	64.83	-0.588
LcbHLH44	augustus52899.t1	29106.9	9.66	263	nucleus	55.85	68.97	-0.329
LcbHLH45	augustus21364.t1	48519.2	5.56	449	nucleus	71.31	76.68	-0.453
LcbHLH46	augustus53045.t1	52963.5	5.58	489	nucleus	63.74	80.18	-0.365
LcbHLH47	augustus49806.t1	48101.2	5.56	432	nucleus	50.61	72.85	-0.59
LcbHLH48	augustus49852.t1	40851.5	7.19	362	nucleus	52.64	77.54	-0.477
LcbHLH49	augustus49854.t1	40851.5	7.19	362	nucleus	52.64	77.54	-0.477
LcbHLH50	augustus49858.t1	39617.7	7.18	354	nucleus	49.66	78.98	-0.494
LcbHLH51	augustus49886.t1	43819.3	4.95	384	nucleus	68.64	77.92	-0.619
LcbHLH52	augustus47107.t1	24339.6	9.22	227	chloroplast	46.36	78.55	-0.426
LcbHLH53	augustus01310.t1	24277.5	9.22	227	chloroplast	46.36	79.43	-0.432
LcbHLH54	augustus47163.t1	35080.9	9.12	310	nucleus	58.19	81.13	-0.429
LcbHLH55	augustus28719.t1	34775.5	8.1	308	nucleus	60.91	81.98	-0.383
LcbHLH56	augustus75831.t1	54589.2	8.24	501	nucleus	60.26	57.41	-0.7
LcbHLH57	augustus41181.t1	47070.3	8.07	423	nucleus	58.26	53.95	-0.748
LcbHLH58	augustus65044.t1	47356.6	7.64	423	nucleus	57.82	53.71	-0.785
LcbHLH59	augustus75369.t1	38464.7	7.05	343	nucleus	53.44	73.35	-0.461
LcbHLH60	augustus28781.t1	38498.7	7.05	343	nucleus	54.09	72.22	-0.466
LcbHLH61	augustus16781.t1	39837.8	4.75	362	nucleus	60.96	73.84	-0.675
LcbHLH62	augustus33503.t1	39177	4.7	357	nucleus	58.92	71.62	-0.69
LcbHLH63	augustus29885.t1	43720.3	5.69	389	nucleus	51.68	79	-0.458
LcbHLH64	augustus15868.t1	32854.7	6.4	304	nucleus	56.72	72.5	-0.539
LcbHLH65	augustus42164.t1	32407.2	6.2	297	nucleus	57.21	71.62	-0.568
LcbHLH66	augustus78823.t1	31923.7	5.7	294	nucleus	55.16	74.01	-0.528
LcbHLH67	augustus63720.t1	26295.2	8.76	237	cytoplasm	48.22	93.38	-0.419
LcbHLH68	augustus36073.t1	37962.2	5.35	346	nucleus	65.68	87.02	-0.31
LcbHLH69	augustus07124.t1	74253.5	5.44	659	chloroplast	42.36	72.31	-0.621
LcbHLH70	augustus50926.t1	33587.3	7.09	303	nucleus	59.93	57	-1.037
LcbHLH71	augustus13421.t1	49572.3	5.3	445	nucleus	54.83	63.15	-0.642
LcbHLH72	augustus43507.t1	18174.3	6.5	163	nucleus	64.11	63.37	-0.6
LcbHLH73	augustus58374.t1	18162.3	6.5	163	nucleus	64.63	60.98	-0.632
LcbHLH74	augustus54870.t1	28401.6	8.78	255	nucleus	58.55	94.9	-0.313
LcbHLH75	augustus31122.t1	29048.2	8.31	260	nucleus	52.66	94.96	-0.317
LcbHLH76	augustus81140.t1	28452.5	8.54	251	nucleus	50.48	92.03	-0.429
LcbHLH77	augustus14971.t1	41528.2	8.09	381	nucleus	53.01	67.06	-0.589
LcbHLH78	augustus14977.t1	40182.8	5.15	363	nucleus	45.55	76.58	-0.62
LcbHLH79	augustus58790.t1	40126.6	5.15	363	nucleus	47.14	76.86	-0.627
LcbHLH80	augustus58797.t1	41516.2	8.09	381	nucleus	52.5	66.04	-0.602
LcbHLH81	augustus70275.t1	28433.5	8.54	251	nucleus	52.92	92.03	-0.457
LcbHLH82	augustus64941.t1	55028.3	5.85	503	nucleus	48.18	73.3	-0.569
LcbHLH83	augustus57608.t1	55059.3	5.85	503	nucleus	48.4	72.52	-0.581
LcbHLH84	augustus59858.t1	41899.9	8.69	385	nucleus	55.12	54.34	-0.65
LcbHLH85	augustus35063.t1	26794.9	5.43	238	nucleus	47.97	74.54	-0.643
LcbHLH86	augustus35062.t1	35577.4	5.35	316	nucleus	47.86	85.44	-0.266
LcbHLH87	augustus03943.t1	54938.7	5.02	492	nucleus	47.85	79.43	-0.374
LcbHLH88	augustus03916.t1	35843.7	5.34	318	nucleus	49.01	84.91	-0.285
LcbHLH89	augustus79213.t1	35043.8	5.47	312	nucleus	50.18	85.29	-0.271
LcbHLH90	augustus77040.t1	31502.4	4.92	274	nucleus	56.56	70.84	-0.472
LcbHLH91	augustus41360.t1	31533.3	5.04	274	nucleus	53.73	67.3	-0.554
LcbHLH92	augustus57592.t1	27731.3	8.66	253	nucleus	52.71	81.03	-0.391
LcbHLH93	augustus52522.t1	25672.6	5.52	229	nucleus	51.75	92.45	-0.264
LcbHLH94	augustus52510.t1	26326	5.87	235	nucleus	56.06	75.91	-0.569
LcbHLH95	augustus30854.t1	29481.4	8.99	269	nucleus	62.76	62.83	-0.461
LcbHLH96	augustus79165.t1	13460.5	10.12	120	nucleus	69.11	74.83	-0.662
LcbHLH97	augustus79115.t1	32492.5	6.26	293	nucleus	52.64	70.92	-0.538
LcbHLH98	augustus79116.t1	43394.5	5.47	399	nucleus	52.86	72.36	-0.455
LcbHLH99	augustus15274.t1	35069	5.73	323	nucleus	56.49	70.4	-0.527
LcbHLH100	augustus20640.t1	46959.4	5.59	432	nucleus	56.79	64.33	-0.633
LcbHLH101	augustus81095.t1	39100.7	6.17	356	nucleus	57.78	66.83	-0.705
LcbHLH102	augustus54105.t1	36516.3	4.7	321	nucleus	56.48	78.07	-0.496
LcbHLH103	augustus63159.t1	36486.2	4.7	321	nucleus	55.09	76.85	-0.515
LcbHLH104	augustus31505.t1	25093.3	8.69	235	nucleus	45.81	75.53	-0.411
LcbHLH105	augustus25250.t1	25137.3	8.47	235	nucleus	46.18	75.11	-0.434
LcbHLH106	augustus69255.t1	75384.3	5.9	706	nucleus	53.9	57.63	-0.592
LcbHLH107	augustus68067.t1	75561.6	5.9	707	nucleus	54.14	57.28	-0.589
LcbHLH108	genewise18140.t1	37072.4	5.96	329	nucleus	69.15	76.72	-0.567
LcbHLH109	augustus13827.t1	40838.5	9.53	373	chloroplast	54.36	72.2	-0.469
LcbHLH110	augustus59384.t1	24265.7	6.85	213	nucleus	56.55	71.13	-0.648
LcbHLH111	augustus27056.t1	54572.3	5.13	510	nucleus	52.26	79.12	-0.387
LcbHLH112	augustus02776.t1	59540.3	6.09	528	nucleus	55.19	81.12	-0.389
LcbHLH113	augustus80065.t1	52187.1	6.09	497	nucleus	43.59	66.8	-0.456
LcbHLH114	augustus62196.t1	67657.1	6.86	608	nucleus	46.64	74.7	-0.532
LcbHLH115	augustus39568.t1	53473	5.32	478	nucleus	46	81.55	-0.504
LcbHLH116	augustus43849.t1	95998.2	5.74	854	plasmodesmata	52.41	93.52	-0.298
LcbHLH117	augustus20678.t1	53473	5.32	478	nucleus	46	81.55	-0.504
LcbHLH118	augustus81247.t1	47651.2	8.79	440	nucleus	49.48	57.91	-0.499
LcbHLH119	augustus57375.t1	49697.5	8.72	457	nucleus	45.97	59.17	-0.521
LcbHLH120	augustus03694.t1	69076.7	5.35	622	nucleus	47.98	72.12	-0.614
LcbHLH121	augustus03692.t1	58462.8	5.02	527	nucleus	44.92	69.98	-0.56
LcbHLH122	augustus03688.t1	51324.9	5.37	468	nucleus	42.51	68.82	-0.546
LcbHLH123	augustus03686.t1	29018.6	6.08	263	nucleus	41.53	77.49	-0.474
LcbHLH124	augustus03685.t1	57602.1	5.41	516	nucleus	49.55	72.95	-0.62
LcbHLH125	augustus03682.t1	59465.3	5.57	533	nucleus	52.11	74.63	-0.581
LcbHLH126	augustus39546.t1	27583.2	5.45	242	nucleus	63.25	81.03	-0.557
LcbHLH127	augustus18480.t1	39835.2	8.99	355	golgi apparatus	62.51	84.87	-0.264
LcbHLH128	augustus17184.t1	70159.9	5.92	635	plasmodesmata	50.12	74.65	-0.351
LcbHLH129	augustus17182.t1	70545.4	5.98	637	plasmodesmata	46.47	78.24	-0.341
LcbHLH130	augustus41038.t1	24720.3	8.34	219	nucleus	63.19	90	-0.415
LcbHLH131	augustus77488.t1	32212.5	6.36	299	nucleus	61.71	63.01	-0.449
LcbHLH132	augustus29571.t1	23469.6	8.85	209	nucleus	51.19	70	-0.508
LcbHLH133	augustus71441.t1	23529.7	8.85	209	nucleus	51.19	70	-0.49
LcbHLH134	augustus38404.t1	23991	6.11	221	nucleus	64.24	82.53	-0.44
LcbHLH135	augustus67444.t1	60611.5	5.73	565	nucleus	49.25	63.72	-0.595
LcbHLH136	augustus45666.t1	60668.5	5.55	565	nucleus	51.2	63.54	-0.609
LcbHLH137	augustus18444.t1	37660.8	5.94	341	nucleus	60.26	62.61	-0.855
LcbHLH138	augustus65962.t1	25818.3	8.45	236	nucleus	48.71	72.8	-0.593
LcbHLH139	augustus27934.t1	25860.4	8.45	236	nucleus	52.2	73.64	-0.583
LcbHLH140	augustus21068.t1	30209.6	5.52	272	nucleus	50.25	63.49	-0.737
LcbHLH141	augustus47244.t1	27507.7	5.49	247	nucleus	54.6	65.18	-0.677
LcbHLH142	augustus25953.t1	24307.9	8.87	214	cytoplasm	44.58	89.25	-0.567
LcbHLH143	augustus25954.t1	45523.1	6.37	404	nucleus	54.74	73.84	-0.664
LcbHLH144	augustus32512.t1	23355.7	8.35	204	cytoplasm	46.17	87.89	-0.608
LcbHLH145	augustus26166.t1	38291.6	6.17	335	nucleus	60.02	78.57	-0.544
LcbHLH146	augustus18878.t1	34155.9	7.12	306	nucleus	61.2	86.05	-0.423
LcbHLH147	augustus18860.t1	72893.9	5.57	665	nucleus	41.11	69.67	-0.59
LcbHLH148	augustus16077.t1	33610.3	8.18	301	nucleus	58.33	86.18	-0.416
LcbHLH149	augustus16061.t1	72820.9	5.57	664	nucleus	39.77	69.92	-0.586
LcbHLH150	augustus32526.t1	34686.6	6.01	308	nucleus	48.4	67.82	-0.709
LcbHLH151	augustus41669.t1	34659.6	6.07	307	nucleus	48.12	66.78	-0.741
LcbHLH152	augustus27484.t1	44125.3	6.55	394	nucleus	43.63	89.77	-0.218
LcbHLH153	augustus26524.t1	45242.8	6.96	405	nucleus	48.06	93.6	-0.156
LcbHLH154	augustus26523.t1	54749.7	6.29	491	nucleus	42.81	84.34	-0.342
LcbHLH155	augustus27472.t1	45228.7	6.96	405	nucleus	45.89	93.6	-0.156
LcbHLH156	augustus67252.t1	71922.1	5.49	642	nucleus	50.47	84.5	-0.437
LcbHLH157	augustus60390.t1	71451.7	6.12	639	nucleus	48.98	84.62	-0.438
LcbHLH158	augustus44839.t1	28331.4	7.66	243	nucleus	65.27	88.15	-0.66
LcbHLH159	augustus47877.t1	16957.3	5.51	147	nucleus	53.47	88.16	-0.586
LcbHLH160	augustus47876.t1	28345.4	7.66	243	nucleus	66.13	88.56	-0.651
LcbHLH161	augustus68183.t1	30250.1	5.51	263	cytoplasm	53.46	73.42	-0.521
LcbHLH162	augustus07478.t1	24982.2	7.7	217	nucleus	57.02	69.17	-0.679
LcbHLH163	augustus08232.t1	28087.7	8.76	253	nucleus	62.59	74.07	-0.469
LcbHLH164	augustus74258.t1	130430	7.35	1186	nucleus	64.47	56.42	-0.814
LcbHLH165	augustus54215.t1	23469.6	8.85	209	nucleus	51.19	70	-0.508

## Sheet: TableS3
Table S3.The gene tandem replication on Loropetalum chinense var. rubrum chromosome
Gene ID		Gene name
Gene 1	Gene 2	Gene 1	Gene 2	Chr
augustus03686.t1	augustus03685.t1	LcbHLH123	LcbHLH124	10
augustus03694.t1	augustus03692.t1	LcbHLH120	LcbHLH121	10
augustus17184.t1	augustus17182.t1	LcbHLH128	LcbHLH129	10
augustus25953.t1	augustus25954.t1	LcbHLH142	LcbHLH143	11
augustus26524.t1	augustus26523.t1	LcbHLH153	LcbHLH154	12
augustus35063.t1	augustus35062.t1	LcbHLH85	LcbHLH86	7
augustus47877.t1	augustus47876.t1	LcbHLH159	LcbHLH160	12

## Sheet: TableS4
Table S4.The gene fragment replication on Loropetalum chinense var. rubrum chromosome
Gene ID		Gene name
Gene 1	Gene 2	Gene 1	Gene 2
augustus53257.t1	augustus54053.t1	LcbHLH9	LcbHLH10
augustus23985.t1	augustus47033.t1	LcbHLH15	LcbHLH17
augustus12785.t1	augustus54245.t1	LcbHLH13	LcbHLH14
augustus76721.t1	augustus76710.t1	LcbHLH1	LcbHLH2
augustus28367.t1	augustus42512.t1	LcbHLH6	LcbHLH22
augustus23985.t1	augustus47163.t1	LcbHLH15	LcbHLH54
augustus28367.t1	augustus13827.t1	LcbHLH6	LcbHLH109
augustus81247.t1	augustus57375.t1	LcbHLH118	LcbHLH119
augustus39546.t1	augustus41038.t1	LcbHLH126	LcbHLH130
augustus39568.t1	augustus20678.t1	LcbHLH115	LcbHLH117
augustus20678.t1	augustus27484.t1	LcbHLH117	LcbHLH152
augustus39568.t1	augustus26524.t1	LcbHLH115	LcbHLH153
augustus21068.t1	augustus47244.t1	LcbHLH140	LcbHLH141
augustus25953.t1	augustus32512.t1	LcbHLH142	LcbHLH144
augustus65962.t1	augustus27934.t1	LcbHLH138	LcbHLH139
augustus29571.t1	augustus71441.t1	LcbHLH132	LcbHLH133
augustus26166.t1	augustus42435.t1	LcbHLH145	LcbHLH25
augustus18444.t1	augustus46440.t1	LcbHLH137	LcbHLH32
augustus27934.t1	augustus52510.t1	LcbHLH139	LcbHLH94
augustus18878.t1	augustus16077.t1	LcbHLH146	LcbHLH148
augustus18860.t1	augustus16061.t1	LcbHLH147	LcbHLH149
augustus44839.t1	augustus63720.t1	LcbHLH158	LcbHLH67
augustus42426.t1	augustus37928.t1	LcbHLH26	LcbHLH34
augustus01443.t1	augustus46073.t1	LcbHLH29	LcbHLH30
augustus33921.t1	augustus65717.t1	LcbHLH27	LcbHLH28
augustus35499.t1	augustus59384.t1	LcbHLH20	LcbHLH110
augustus06310.t1	augustus53990.t1	LcbHLH40	LcbHLH41
augustus21364.t1	augustus53045.t1	LcbHLH45	LcbHLH46
augustus43753.t1	augustus75831.t1	LcbHLH39	LcbHLH56
augustus15216.t1	augustus13421.t1	LcbHLH43	LcbHLH71
augustus49854.t1	augustus28781.t1	LcbHLH49	LcbHLH60
augustus21364.t1	augustus79116.t1	LcbHLH45	LcbHLH98
augustus49806.t1	augustus81095.t1	LcbHLH47	LcbHLH101
augustus01310.t1	augustus25250.t1	LcbHLH53	LcbHLH105
augustus49886.t1	augustus54105.t1	LcbHLH51	LcbHLH102
augustus49806.t1	augustus20640.t1	LcbHLH47	LcbHLH100
augustus49886.t1	augustus63159.t1	LcbHLH51	LcbHLH103
augustus52899.t1	augustus79165.t1	LcbHLH44	LcbHLH96
augustus41181.t1	augustus65044.t1	LcbHLH57	LcbHLH58
augustus41181.t1	augustus58797.t1	LcbHLH57	LcbHLH80
augustus65044.t1	augustus58797.t1	LcbHLH58	LcbHLH80
augustus65044.t1	augustus59858.t1	LcbHLH58	LcbHLH84
augustus41181.t1	augustus59858.t1	LcbHLH57	LcbHLH84
augustus75369.t1	augustus28781.t1	LcbHLH59	LcbHLH60
augustus16781.t1	augustus33503.t1	LcbHLH61	LcbHLH62
augustus29885.t1	augustus78823.t1	LcbHLH63	LcbHLH66
augustus81140.t1	augustus70275.t1	LcbHLH76	LcbHLH81
augustus14971.t1	augustus58797.t1	LcbHLH77	LcbHLH80
augustus14977.t1	augustus58790.t1	LcbHLH78	LcbHLH79
augustus43507.t1	augustus58374.t1	LcbHLH72	LcbHLH73
augustus58797.t1	augustus59858.t1	LcbHLH80	LcbHLH84
augustus35063.t1	augustus79213.t1	LcbHLH85	LcbHLH89
augustus64941.t1	augustus57608.t1	LcbHLH82	LcbHLH83
augustus77040.t1	augustus41360.t1	LcbHLH90	LcbHLH91
augustus69255.t1	augustus68067.t1	LcbHLH106	LcbHLH107
augustus54105.t1	augustus63159.t1	LcbHLH102	LcbHLH103

## Sheet: TableS5
Table S5.The Ka/Ks ratios for duplicate pairs of LcbHLHs.
Gene ID		Duplication gene pair		Ka	Ks	Ka/Ks
augustus03686.t1	augustus03685.t1	LcbHLH123	LcbHLH124	0.097742	0.155594	0.628182
augustus03694.t1	augustus03692.t1	LcbHLH120	LcbHLH121	0.022233	0.056603	0.392792
augustus17184.t1	augustus17182.t1	LcbHLH128	LcbHLH129	0.063861	0.084543	0.755363
augustus25953.t1	augustus25954.t1	LcbHLH142	LcbHLH143	0.194786	0.470535	0.413968
augustus26524.t1	augustus26523.t1	LcbHLH153	LcbHLH154	0.224868	0.549642	0.409117
augustus35063.t1	augustus35062.t1	LcbHLH85	LcbHLH86	0.019279	0.077423	0.249008
augustus47877.t1	augustus47876.t1	LcbHLH159	LcbHLH160	0.12998	0.44346	0.293105
augustus53257.t1	augustus54053.t1	LcbHLH9	LcbHLH10	0.000845428	0.0120545	0.0701338
augustus23985.t1	augustus47033.t1	LcbHLH15	LcbHLH17	0.00656819	0	-
augustus12785.t1	augustus54245.t1	LcbHLH13	LcbHLH14	0.011508	0.0143134	0.804004
augustus76721.t1	augustus76710.t1	LcbHLH1	LcbHLH2	0	0	-
augustus28367.t1	augustus42512.t1	LcbHLH6	LcbHLH22	0.20468	1.21632	0.168277
augustus23985.t1	augustus47163.t1	LcbHLH15	LcbHLH54	0.355719	3.37572	0.105376
augustus28367.t1	augustus13827.t1	LcbHLH6	LcbHLH109	0.20724	1.52896	0.135543
augustus81247.t1	augustus57375.t1	LcbHLH118	LcbHLH119	0.0163991	0.0359249	0.456483
augustus39546.t1	augustus41038.t1	LcbHLH126	LcbHLH130	0.0376585	0.0511963	0.73557
augustus39568.t1	augustus20678.t1	LcbHLH115	LcbHLH117	0	0.0308368	0
augustus20678.t1	augustus27484.t1	LcbHLH117	LcbHLH152	0.408615	1.97539	0.206853
augustus39568.t1	augustus26524.t1	LcbHLH115	LcbHLH153	0.400808	1.93737	0.206882
augustus21068.t1	augustus47244.t1	LcbHLH140	LcbHLH141	0.0222803	0.0206057	1.08127
augustus25953.t1	augustus32512.t1	LcbHLH142	LcbHLH144	0.015958	0.0118113	1.35109
augustus65962.t1	augustus27934.t1	LcbHLH138	LcbHLH139	0.00736202	0.018751	0.392621
augustus29571.t1	augustus71441.t1	LcbHLH132	LcbHLH133	0.00203459	0.00745348	0.272972
augustus26166.t1	augustus42435.t1	LcbHLH145	LcbHLH25	0.38667	1.67424	0.230953
augustus18444.t1	augustus46440.t1	LcbHLH137	LcbHLH32	0.279483	0.9977	0.280127
augustus27934.t1	augustus52510.t1	LcbHLH139	LcbHLH94	0.16796	0.944862	0.177762
augustus18878.t1	augustus16077.t1	LcbHLH146	LcbHLH148	0.00289925	0.0437371	0.0662882
augustus18860.t1	augustus16061.t1	LcbHLH147	LcbHLH149	0.00325999	0.0177951	0.183196
augustus44839.t1	augustus63720.t1	LcbHLH158	LcbHLH67	0.35479	1.21758	0.291389
augustus42426.t1	augustus37928.t1	LcbHLH26	LcbHLH34	0.210132	1.16068	0.181042
augustus01443.t1	augustus46073.t1	LcbHLH29	LcbHLH30	0.00922087	0.00893399	1.03211
augustus33921.t1	augustus65717.t1	LcbHLH27	LcbHLH28	0	0.00521288	0
augustus35499.t1	augustus59384.t1	LcbHLH20	LcbHLH110	0.234126	1.0007	0.233963
augustus06310.t1	augustus53990.t1	LcbHLH40	LcbHLH41	0.0610599	0.0908331	0.672221
augustus21364.t1	augustus53045.t1	LcbHLH45	LcbHLH46	0.017358	0.0265841	0.652947
augustus43753.t1	augustus75831.t1	LcbHLH39	LcbHLH56	0.0393712	0.0829202	0.474808
augustus15216.t1	augustus13421.t1	LcbHLH43	LcbHLH71	0.364358	1.46071	0.249439
augustus49854.t1	augustus28781.t1	LcbHLH49	LcbHLH60	0.372217	1.72829	0.215367
augustus21364.t1	augustus79116.t1	LcbHLH45	LcbHLH98	0.325012	0.979993	0.331647
augustus49806.t1	augustus81095.t1	LcbHLH47	LcbHLH101	0.34957	0.813504	0.429709
augustus01310.t1	augustus25250.t1	LcbHLH53	LcbHLH105	0.369781	1.70795	0.216506
augustus49886.t1	augustus54105.t1	LcbHLH51	LcbHLH102	0.300735	1.09472	0.274714
augustus49806.t1	augustus20640.t1	LcbHLH47	LcbHLH100	0.370645	0.849697	0.436208
augustus49886.t1	augustus63159.t1	LcbHLH51	LcbHLH103	0.309569	1.07114	0.289008
augustus52899.t1	augustus79165.t1	LcbHLH44	LcbHLH96	0.180974	1.05785	0.171077
augustus41181.t1	augustus65044.t1	LcbHLH57	LcbHLH58	0.00909868	0.0260088	0.349831
augustus41181.t1	augustus58797.t1	LcbHLH57	LcbHLH80	0.346021	1.23989	0.279075
augustus65044.t1	augustus58797.t1	LcbHLH58	LcbHLH80	0.366655	1.22821	0.298528
augustus65044.t1	augustus59858.t1	LcbHLH58	LcbHLH84	0.29856	1.08915	0.274121
augustus41181.t1	augustus59858.t1	LcbHLH57	LcbHLH84	0.286398	1.07224	0.267101
augustus75369.t1	augustus28781.t1	LcbHLH59	LcbHLH60	0.0012487	0.00884314	0.141205
augustus16781.t1	augustus33503.t1	LcbHLH61	LcbHLH62	0.0168445	0.0446893	0.376925
augustus29885.t1	augustus78823.t1	LcbHLH63	LcbHLH66	0.0462437	0.0486586	0.95037
augustus81140.t1	augustus70275.t1	LcbHLH76	LcbHLH81	0.00689066	0.0178757	0.385476
augustus14971.t1	augustus58797.t1	LcbHLH77	LcbHLH80	0.00113723	0.00381195	0.298331
augustus14977.t1	augustus58790.t1	LcbHLH78	LcbHLH79	0.00479378	0.00798145	0.600616
augustus43507.t1	augustus58374.t1	LcbHLH72	LcbHLH73	0.00265252	0.00903625	0.293542
augustus58797.t1	augustus59858.t1	LcbHLH80	LcbHLH84	0.306501	1.33134	0.230221
augustus35063.t1	augustus79213.t1	LcbHLH85	LcbHLH89	0.0211411	0.0774229	0.27306
augustus64941.t1	augustus57608.t1	LcbHLH82	LcbHLH83	0.00258139	0.0116904	0.220812
augustus77040.t1	augustus41360.t1	LcbHLH90	LcbHLH91	0.0125822	0.0634384	0.198338
augustus69255.t1	augustus68067.t1	LcbHLH106	LcbHLH107	0.00274209	0.0182707	0.150082
augustus54105.t1	augustus63159.t1	LcbHLH102	LcbHLH103	0.00531681	0.00482317	1.10235

## Sheet: TableS6
Table S6. The synteny regions of bHLH genes in diverse species
Arabidopsis	L. chinense		L. chinense	Oryza sativa				L. chinense	Vitis vinifera		L. chinense	Zea mays
At--transcript:AT1G22490.2	Lc--augustus23985.t1		Lc-augustus76710.t1	Os-transcript:Os05t0139100-01				Lc-augustus76710.t1	Vv-transcript:Vitvi07g02251_t002		Lc-augustus76710.t1	Zm-transcript:Zm00001eb417610_T002
At--transcript:AT1G01260.3	Lc--augustus20678.t1		Lc-augustus43111.t1	Os-transcript:Os01t0286100-01				Lc-augustus43111.t1	Vv-transcript:Vitvi07g02251_t002		Lc-augustus43111.t1	Zm-transcript:Zm00001eb129520_T001
At--transcript:AT1G68810.1	Lc--augustus38404.t1		Lc-augustus28367.t1	Os-transcript:Os03t0797600-01				Lc-augustus40183.t1	Vv-transcript:Vitvi07g00139_t001		Lc-augustus28367.t1	Zm-transcript:Zm00001eb301520_T001
At--transcript:AT1G26260.1	Lc--augustus67444.t1		Lc-augustus53257.t1	Os-transcript:Os11t0442500-00				Lc-augustus28367.t1	Vv-transcript:Vitvi14g00477_t001		Lc-augustus53257.t1	Zm-transcript:Zm00001eb317460_T004
At--transcript:AT1G59640.2	Lc--augustus21068.t1		Lc-augustus54053.t1	Os-transcript:Os01t0915600-01				Lc-augustus18983.t1	Vv-transcript:Vitvi07g00002_t001		Lc-augustus54053.t1	Zm-transcript:Zm00001eb036040_T006
At--transcript:AT1G68920.4	Lc--augustus67444.t1		Lc-augustus23985.t1	Os-transcript:Os09t0468700-00				Lc-augustus78482.t1	Vv-transcript:Vitvi18g02008_t002		Lc-augustus23985.t1	Zm-transcript:Zm00001eb101190_T001
At--transcript:AT1G69010.1	Lc--augustus18444.t1		Lc-augustus47033.t1	Os-transcript:Os09t0468700-00				Lc-augustus12785.t1	Vv-transcript:Vitvi07g00762_t001		Lc-augustus32790.t1	Zm-transcript:Zm00001eb144450_T002
At--transcript:AT1G10120.1	Lc--augustus47244.t1		Lc-augustus32790.t1	Os-transcript:Os01t0900800-01				Lc-augustus54245.t1	Vv-transcript:Vitvi07g00762_t001		Lc-augustus42512.t1	Zm-transcript:Zm00001eb301520_T001
At--transcript:AT1G10610.1	Lc--augustus25953.t1		Lc-augustus42435.t1	Os-transcript:Os08t0536800-01				Lc-augustus23985.t1	Vv-transcript:Vitvi18g00463_t001		Lc-augustus42435.t1	Zm-transcript:Zm00001eb318020_T003
At--transcript:AT1G66470.1	Lc--augustus41669.t1		Lc-augustus42426.t1	Os-transcript:Os11t0523700-01				Lc-augustus47033.t1	Vv-transcript:Vitvi18g00463_t001		Lc-augustus42426.t1	Zm-transcript:Zm00001eb170530_T001
At--transcript:AT1G63650.3	Lc--augustus67252.t1		Lc-augustus37928.t1	Os-transcript:Os11t0523700-01				Lc-augustus32790.t1	Vv-transcript:Vitvi05g01393_t002		Lc-augustus37928.t1	Zm-transcript:Zm00001eb113220_T001
At--transcript:AT1G12540.1	Lc--augustus44839.t1		Lc-augustus15216.t1	Os-transcript:Os02t0705500-02				Lc-augustus35384.t1	Vv-transcript:Vitvi05g01063_t001		Lc-augustus15216.t1	Zm-transcript:Zm00001eb188380_T001
At--transcript:AT1G32640.1	Lc--augustus27484.t1		Lc-augustus52899.t1	Os-transcript:Os09t0455300-01				Lc-augustus35499.t1	Vv-transcript:Vitvi05g00711_t001		Lc-augustus49806.t1	Zm-transcript:Zm00001eb055990_T001
At--transcript:AT1G62975.1	Lc--augustus44839.t1		Lc-augustus49806.t1	Os-transcript:Os03t0728900-00				Lc-augustus45844.t1	Vv-transcript:Vitvi05g00711_t001		Lc-augustus49852.t1	Zm-transcript:Zm00001eb055830_T002
At--transcript:AT1G05805.1	Lc--augustus32790.t1		Lc-augustus49852.t1	Os-transcript:Os12t0632600-00				Lc-augustus42512.t1	Vv-transcript:Vitvi14g00477_t001		Lc-augustus01310.t1	Zm-transcript:Zm00001eb101040_T001
At--transcript:AT1G51140.1	Lc--augustus59858.t1		Lc-augustus01310.t1	Os-transcript:Os08t0477900-00				Lc-augustus20203.t1	Vv-transcript:Vitvi05g00427_t001		Lc-augustus47163.t1	Zm-transcript:Zm00001eb006680_T002
At--transcript:AT1G59640.2	Lc--augustus20640.t1		Lc-augustus47163.t1	Os-transcript:Os02t0759000-01				Lc-augustus45506.t1	Vv-transcript:Vitvi05g00427_t001		Lc-augustus41181.t1	Zm-transcript:Zm00001eb034940_T004
At--transcript:AT1G10120.1	Lc--augustus20640.t1		Lc-augustus41181.t1	Os-transcript:Os08t0506700-01				Lc-augustus42435.t1	Vv-transcript:Vitvi01g01745_t001		Lc-augustus65044.t1	Zm-transcript:Zm00001eb034940_T004
At--transcript:AT2G46970.1	Lc--augustus43111.t1		Lc-augustus65044.t1	Os-transcript:Os08t0506700-01				Lc-augustus42426.t1	Vv-transcript:Vitvi01g01757_t001		Lc-augustus16781.t1	Zm-transcript:Zm00001eb108190_T001
At--transcript:AT2G46510.1	Lc--augustus62196.t1		Lc-augustus16781.t1	Os-transcript:Os07t0588400-00				Lc-augustus33921.t1	Vv-transcript:Vitvi01g00876_t001		Lc-augustus33503.t1	Zm-transcript:Zm00001eb007580_T001
At--transcript:AT2G24260.1	Lc--augustus80065.t1		Lc-augustus33503.t1	Os-transcript:Os03t0205300-00				Lc-augustus65717.t1	Vv-transcript:Vitvi01g00876_t001		Lc-augustus13421.t1	Zm-transcript:Zm00001eb215610_T004
At--transcript:AT2G43140.2	Lc--augustus32790.t1		Lc-augustus43507.t1	Os-transcript:Os01t0831000-01				Lc-augustus01443.t1	Vv-transcript:Vitvi17g00678_t001		Lc-augustus43507.t1	Zm-transcript:Zm00001eb148990_T001
At--transcript:AT2G18300.3	Lc--augustus15216.t1		Lc-augustus14971.t1	Os-transcript:Os09t0487900-01				Lc-augustus46073.t1	Vv-transcript:Vitvi17g00678_t001		Lc-augustus58790.t1	Zm-transcript:Zm00001eb388300_T001
At--transcript:AT2G22750.3	Lc--augustus49852.t1		Lc-augustus58790.t1	Os-transcript:Os06t0613500-01				Lc-augustus39910.t1	Vv-transcript:Vitvi17g00442_t001		Lc-augustus58797.t1	Zm-transcript:Zm00001eb034940_T004
At--transcript:AT2G22750.3	Lc--augustus49854.t1		Lc-augustus58797.t1	Os-transcript:Os08t0506700-01				Lc-augustus46440.t1	Vv-transcript:Vitvi01g01287_t001		Lc-augustus64941.t1	Zm-transcript:Zm00001eb356930_T002
At--transcript:AT2G18300.3	Lc--augustus13421.t1		Lc-augustus64941.t1	Os-transcript:Os01t0566800-00				Lc-augustus37928.t1	Vv-transcript:Vitvi01g01757_t001		Lc-augustus59858.t1	Zm-transcript:Zm00001eb034940_T004
At--transcript:AT2G14760.3	Lc--augustus33503.t1		Lc-augustus59858.t1	Os-transcript:Os08t0506700-01				Lc-augustus06837.t1	Vv-transcript:Vitvi10g02218_t001		Lc-augustus52522.t1	Zm-transcript:Zm00001eb106620_T001
At--transcript:AT2G16910.1	Lc--augustus07124.t1		Lc-augustus52522.t1	Os-transcript:Os07t0549600-01				Lc-augustus06851.t1	Vv-transcript:Vitvi12g00567_t001		Lc-augustus52510.t1	Zm-transcript:Zm00001eb323440_T004
At--transcript:AT2G14760.3	Lc--augustus16781.t1		Lc-augustus52510.t1	Os-transcript:Os07t0543000-01				Lc-augustus62670.t1	Vv-transcript:Vitvi10g02253_t001		Lc-augustus81095.t1	Zm-transcript:Zm00001eb055990_T001
At--transcript:AT2G41240.1	Lc--augustus81140.t1		Lc-augustus30854.t1	Os-transcript:Os09t0455300-01				Lc-augustus06310.t1	Vv-transcript:Vitvi04g01463_t001		Lc-augustus25250.t1	Zm-transcript:Zm00001eb101040_T001
At--transcript:AT2G40200.1	Lc--augustus54870.t1		Lc-augustus81095.t1	Os-transcript:Os03t0728900-00				Lc-augustus53990.t1	Vv-transcript:Vitvi04g01463_t001		Lc-augustus69255.t1	Zm-transcript:Zm00001eb129520_T001
At--transcript:AT2G42280.3	Lc--augustus58797.t1		Lc-augustus31505.t1	Os-transcript:Os09t0463900-00				Lc-augustus15216.t1	Vv-transcript:Vitvi03g00315_t001		Lc-augustus68067.t1	Zm-transcript:Zm00001eb417610_T002
At--transcript:AT2G42300.1	Lc--augustus58790.t1		Lc-augustus25250.t1	Os-transcript:Os08t0477900-00				Lc-augustus52899.t1	Vv-transcript:Vitvi18g00779_t001		Lc-augustus27056.t1	Zm-transcript:Zm00001eb374120_T001
At--transcript:AT2G28160.1	Lc--augustus79213.t1		Lc-augustus69255.t1	Os-transcript:Os01t0286100-01				Lc-augustus21364.t1	Vv-transcript:Vitvi18g00763_t001		Lc-augustus02776.t1	Zm-transcript:Zm00001eb160210_T001
At--transcript:AT2G28160.1	Lc--augustus79213.t1		Lc-augustus68067.t1	Os-transcript:Os01t0286100-01				Lc-augustus53045.t1	Vv-transcript:Vitvi07g01729_t001		Lc-augustus80065.t1	Zm-transcript:Zm00001eb257810_T001
At--transcript:AT2G28160.1	Lc--augustus35063.t1		Lc-augustus13827.t1	Os-transcript:Os03t0797600-01				Lc-augustus49806.t1	Vv-transcript:Vitvi15g04522_t001		Lc-augustus81247.t1	Zm-transcript:Zm00001eb023350_T002
At--transcript:AT3G07340.1	Lc--augustus53257.t1		Lc-augustus27056.t1	Os-transcript:Os06t0193400-01				Lc-augustus49852.t1	Vv-transcript:Vitvi07g01532_t001		Lc-augustus67444.t1	Zm-transcript:Zm00001eb315870_T001
At--transcript:AT3G07340.1	Lc--augustus54053.t1		Lc-augustus02776.t1	Os-transcript:Os01t0576100-00				Lc-augustus49854.t1	Vv-transcript:Vitvi07g01532_t001		Lc-augustus18444.t1	Zm-transcript:Zm00001eb315910_T006
At--transcript:AT3G62090.2	Lc--augustus43111.t1		Lc-augustus81247.t1	Os-transcript:Os10t0556200-01				Lc-augustus49886.t1	Vv-transcript:Vitvi18g00567_t001		Lc-augustus26166.t1	Zm-transcript:Zm00001eb036990_T003
At--transcript:AT3G25710.1	Lc--augustus38404.t1		Lc-augustus57375.t1	Os-transcript:Os10t0556200-01				Lc-augustus47107.t1	Vv-transcript:Vitvi07g04603_t001		Lc-augustus16061.t1	Zm-transcript:Zm00001eb024330_T001
At--transcript:AT3G06120.1	Lc--augustus20203.t1		Lc-augustus67444.t1	Os-transcript:Os06t0275600-01				Lc-augustus01310.t1	Vv-transcript:Vitvi18g00513_t001		Lc-augustus67252.t1	Zm-transcript:Zm00001eb074320_T001
At--transcript:AT3G06120.1	Lc--augustus45506.t1		Lc-augustus18444.t1	Os-transcript:Os02t0726700-01				Lc-augustus47163.t1	Vv-transcript:Vitvi18g00463_t001
At--transcript:AT3G24140.1	Lc--augustus35384.t1		Lc-augustus26166.t1	Os-transcript:Os08t0536800-01				Lc-augustus41181.t1	Vv-transcript:Vitvi13g01764_t001
At--transcript:AT3G23210.1	Lc--augustus35499.t1		Lc-augustus67252.t1	Os-transcript:Os04t0557200-01				Lc-augustus65044.t1	Vv-transcript:Vitvi13g01764_t001
At--transcript:AT3G26744.2	Lc--augustus37928.t1							Lc-augustus75369.t1	Vv-transcript:Vitvi03g00791_t001
At--transcript:AT3G26744.2	Lc--augustus42426.t1							Lc-augustus28781.t1	Vv-transcript:Vitvi03g00791_t001
At--transcript:AT3G22100.1	Lc--augustus06851.t1							Lc-augustus16781.t1	Vv-transcript:Vitvi18g00673_t001
At--transcript:AT3G50330.1	Lc--augustus52899.t1							Lc-augustus33503.t1	Vv-transcript:Vitvi18g00673_t001
At--transcript:AT3G56970.1	Lc--augustus81140.t1							Lc-augustus29885.t1	Vv-transcript:Vitvi03g00520_t001
At--transcript:AT3G57800.1	Lc--augustus58790.t1							Lc-augustus15868.t1	Vv-transcript:Vitvi03g00520_t001
At--transcript:AT3G57800.1	Lc--augustus14977.t1							Lc-augustus42164.t1	Vv-transcript:Vitvi18g00766_t001
At--transcript:AT3G21330.1	Lc--augustus64941.t1							Lc-augustus78823.t1	Vv-transcript:Vitvi03g00520_t001
At--transcript:AT3G62090.2	Lc--augustus68067.t1							Lc-augustus63720.t1	Vv-transcript:Vitvi16g00882_t001
At--transcript:AT4G00050.1	Lc--augustus81247.t1							Lc-augustus36073.t1	Vv-transcript:Vitvi16g01212_t001
At--transcript:AT4G00050.1	Lc--augustus57375.t1							Lc-augustus07124.t1	Vv-transcript:Vitvi03g00157_t001
At--transcript:AT4G30980.2	Lc--augustus80065.t1							Lc-augustus50926.t1	Vv-transcript:Vitvi03g00098_t001
At--transcript:AT4G00870.1	Lc--augustus39568.t1							Lc-augustus13421.t1	Vv-transcript:Vitvi03g00315_t001
At--transcript:AT4G17880.1	Lc--augustus16061.t1							Lc-augustus43507.t1	Vv-transcript:Vitvi08g00719_t001
At--transcript:AT4G17880.1	Lc--augustus18860.t1							Lc-augustus58374.t1	Vv-transcript:Vitvi08g00719_t001
At--transcript:AT4G14410.1	Lc--augustus35499.t1							Lc-augustus54870.t1	Vv-transcript:Vitvi13g00075_t001
At--transcript:AT4G37850.2	Lc--augustus49852.t1							Lc-augustus31122.t1	Vv-transcript:Vitvi08g00979_t001
At--transcript:AT4G36060.3	Lc--augustus53990.t1							Lc-augustus81140.t1	Vv-transcript:Vitvi08g01649_t001
At--transcript:AT4G37850.2	Lc--augustus49854.t1							Lc-augustus14971.t1	Vv-transcript:Vitvi08g01852_t001
At--transcript:AT4G36540.1	Lc--augustus15216.t1							Lc-augustus14977.t1	Vv-transcript:Vitvi08g01856_t001
At--transcript:AT4G38070.1	Lc--augustus01310.t1							Lc-augustus58790.t1	Vv-transcript:Vitvi08g01856_t001
At--transcript:AT4G36060.3	Lc--augustus06310.t1							Lc-augustus58797.t1	Vv-transcript:Vitvi13g01764_t001
At--transcript:AT4G36930.1	Lc--augustus53045.t1							Lc-augustus64941.t1	Vv-transcript:Vitvi09g00227_t001
At--transcript:AT4G25400.2	Lc--augustus63720.t1							Lc-augustus57608.t1	Vv-transcript:Vitvi09g00227_t001
At--transcript:AT4G36540.1	Lc--augustus13421.t1							Lc-augustus59858.t1	Vv-transcript:Vitvi06g00181_t001
At--transcript:AT4G34530.1	Lc--augustus13421.t1							Lc-augustus35063.t1	Vv-transcript:Vitvi06g01345_t001
At--transcript:AT4G21330.1	Lc--augustus52522.t1							Lc-augustus79213.t1	Vv-transcript:Vitvi06g01345_t001
At--transcript:AT5G48560.1	Lc--augustus53257.t1							Lc-augustus41360.t1	Vv-transcript:Vitvi10g01945_t001
At--transcript:AT5G48560.1	Lc--augustus54053.t1							Lc-augustus57592.t1	Vv-transcript:Vitvi10g00572_t001
At--transcript:AT5G58010.1	Lc--augustus80065.t1							Lc-augustus52522.t1	Vv-transcript:Vitvi10g02164_t001
At--transcript:AT5G54680.1	Lc--augustus27934.t1							Lc-augustus52510.t1	Vv-transcript:Vitvi10g02218_t001
At--transcript:AT5G50915.2	Lc--augustus26166.t1							Lc-augustus79165.t1	Vv-transcript:Vitvi18g00779_t001
At--transcript:AT5G46690.1	Lc--augustus18878.t1							Lc-augustus79115.t1	Vv-transcript:Vitvi18g00766_t001
At--transcript:AT5G46760.1	Lc--augustus18860.t1							Lc-augustus79116.t1	Vv-transcript:Vitvi18g00763_t001
At--transcript:AT5G46690.1	Lc--augustus16077.t1							Lc-augustus20640.t1	Vv-transcript:Vitvi15g04522_t001
At--transcript:AT5G46760.1	Lc--augustus16061.t1							Lc-augustus81095.t1	Vv-transcript:Vitvi18g00617_t001
At--transcript:AT5G37800.1	Lc--augustus41669.t1							Lc-augustus54105.t1	Vv-transcript:Vitvi18g00567_t001
At--transcript:AT5G41315.2	Lc--augustus67252.t1							Lc-augustus63159.t1	Vv-transcript:Vitvi18g00567_t001
At--transcript:AT5G46830.1	Lc--augustus16061.t1							Lc-augustus31505.t1	Vv-transcript:Vitvi18g00513_t001
At--transcript:AT5G61270.1	Lc--augustus01443.t1							Lc-augustus25250.t1	Vv-transcript:Vitvi18g00513_t001
At--transcript:AT5G62610.1	Lc--augustus33921.t1							Lc-augustus69255.t1	Vv-transcript:Vitvi15g04653_t001
At--transcript:AT5G50915.2	Lc--augustus42435.t1							Lc-augustus68067.t1	Vv-transcript:Vitvi15g04653_t001
At--transcript:AT5G61270.1	Lc--augustus46073.t1							Lc-genewise18140.t1	Vv-transcript:Vitvi14g00277_t001
At--transcript:AT5G67060.1	Lc--augustus52899.t1							Lc-augustus13827.t1	Vv-transcript:Vitvi14g00476_t001
At--transcript:AT5G51780.2	Lc--augustus63720.t1							Lc-augustus59384.t1	Vv-transcript:Vitvi14g00562_t001
								Lc-augustus27056.t1	Vv-transcript:Vitvi11g00021_t001
								Lc-augustus02776.t1	Vv-transcript:Vitvi11g00165_t001
								Lc-augustus80065.t1	Vv-transcript:Vitvi11g00680_t001
								Lc-augustus62196.t1	Vv-transcript:Vitvi15g00948_t001
								Lc-augustus39568.t1	Vv-transcript:Vitvi15g00906_t001
								Lc-augustus43849.t1	Vv-transcript:Vitvi02g01369_t001
								Lc-augustus20678.t1	Vv-transcript:Vitvi15g00906_t001
								Lc-augustus81247.t1	Vv-transcript:Vitvi15g00642_t001
								Lc-augustus57375.t1	Vv-transcript:Vitvi15g00642_t001
								Lc-augustus03685.t1	Vv-transcript:Vitvi15g00254_t001
								Lc-augustus17182.t1	Vv-transcript:Vitvi15g00254_t001
								Lc-augustus41038.t1	Vv-transcript:Vitvi11g01153_t001
								Lc-augustus29571.t1	Vv-transcript:Vitvi01g01946_t001
								Lc-augustus71441.t1	Vv-transcript:Vitvi01g01946_t001
								Lc-augustus38404.t1	Vv-transcript:Vitvi01g00232_t001
								Lc-augustus67444.t1	Vv-transcript:Vitvi01g01316_t002
								Lc-augustus18444.t1	Vv-transcript:Vitvi14g01326_t001
								Lc-augustus65962.t1	Vv-transcript:Vitvi19g00406_t001
								Lc-augustus27934.t1	Vv-transcript:Vitvi10g02218_t001
								Lc-augustus21068.t1	Vv-transcript:Vitvi01g00876_t001
								Lc-augustus47244.t1	Vv-transcript:Vitvi01g00876_t001
								Lc-augustus25953.t1	Vv-transcript:Vitvi01g04182_t001
								Lc-augustus32512.t1	Vv-transcript:Vitvi01g04182_t001
								Lc-augustus26166.t1	Vv-transcript:Vitvi01g01745_t001
								Lc-augustus18878.t1	Vv-transcript:Vitvi02g00709_t001
								Lc-augustus18860.t1	Vv-transcript:Vitvi02g00698_t001
								Lc-augustus16077.t1	Vv-transcript:Vitvi02g00709_t001
								Lc-augustus16061.t1	Vv-transcript:Vitvi02g00698_t001
								Lc-augustus32526.t1	Vv-transcript:Vitvi14g00958_t001
								Lc-augustus41669.t1	Vv-transcript:Vitvi14g00958_t001
								Lc-augustus27484.t1	Vv-transcript:Vitvi02g00231_t001
								Lc-augustus26524.t1	Vv-transcript:Vitvi15g00906_t001
								Lc-augustus67252.t1	Vv-transcript:Vitvi15g01124_t001
								Lc-augustus44839.t1	Vv-transcript:Vitvi16g00882_t001

## Sheet: TableS7
Table S7. GO annotation of the bHLH proteins in L. chinense
	GO term	Number	Annotation	LcbHLH1	LcbHLH2	LcbHLH3	LcbHLH4	LcbHLH6	LcbHLH7	LcbHLH8	LcbHLH9	LcbHLH10	LcbHLH11	LcbHLH12	LcbHLH13	LcbHLH14	LcbHLH15	LcbHLH16	LcbHLH17	LcbHLH18	LcbHLH19	LcbHLH20	LcbHLH21	LcbHLH22	LcbHLH23	LcbHLH24	LcbHLH25	LcbHLH26	LcbHLH27	LcbHLH28	LcbHLH29	LcbHLH30	LcbHLH31	LcbHLH32	LcbHLH33	LcbHLH34	LcbHLH35	LcbHLH36	LcbHLH37	LcbHLH38	LcbHLH39	LcbHLH40	LcbHLH41	LcbHLH42	LcbHLH43	LcbHLH44	LcbHLH45	LcbHLH46	LcbHLH47
cellular component (165)	GO:0005634	139	nucleus				√	√	√	√	√	√	√	√	√	√	√	√	√	√	√	√	√	√	√	√	√	√	√	√			√	√	√	√	√	√			√	√	√	√	√	√	√	√	√
	GO:0009506	2	plasmodesma
	GO:0005737	4	cytoplasm
	GO:0005829	2	cytosol																	√
	GO:0005654	1	nucleoplasm
	GO:0009941	1	chloroplast envelope
	GO:0016021	1	integral component of membrane
	GO:0016020	1	membrane
	GO:0005774	1	vacuolar membrane
	GO:0005773	1	vacuole
	GO:0016607	2	nuclear speck																												√	√
	GO:0033391	1	chromatoid body
	GO:0016605	1	PML body
	GO:0005667	1	transcription factor complex
	GO:0043231	1	intracellular membrane-bounded organelle		√
	GO:0090575	6	RNA polymerase II transcription factor complex																																				√
molecular function (474)	GO:0001046	23	core promoter sequence-specific DNA binding					√					√	√				√		√				√														√
	GO:0003700	127	transcription factor activity, sequence-specific DNA binding					√	√	√	√	√	√	√		√	√	√	√	√	√	√	√	√	√	√	√	√			√	√		√	√	√	√	√	√		√	√	√	√		√	√	√	√
	GO:0046983	152	protein dimerization activity	√		√	√	√	√	√	√	√	√	√	√	√	√	√	√	√	√	√	√	√	√	√	√	√	√	√	√	√	√	√	√	√	√	√	√		√	√	√	√	√	√	√	√	√
	GO:0001228	23	transcriptional activator activity, RNA polymerase II transcription regulatory region sequence-specific binding					√					√	√				√		√				√														√
	GO:0044212	2	transcription regulatory region DNA binding																	√
	GO:0003677	96	DNA binding						√	√	√	√			√	√	√		√		√	√	√		√	√	√	√	√	√			√		√	√					√			√	√	√	√	√	√
	GO:0042802	2	identical protein binding												√	√
	GO:0010313	2	phytochrome binding												√	√
	GO:0043565	17	sequence-specific DNA binding																															√			√					√	√
	GO:0070888	1	E-box binding
	GO:0000980	1	RNA polymerase II distal enhancer sequence-specific DNA binding
	GO:0000976	1	transcription regulatory region sequence-specific DNA binding
	GO:0003682	4	chromatin binding
	GO:0000978	4	RNA polymerase II core promoter proximal region sequence-specific DNA binding
	GO:0003690	2	double-stranded DNA binding																												√	√
	GO:0000977	6	RNA polymerase II regulatory region sequence-specific DNA binding																																				√
	GO:0004519	1	endonuclease activity		√
	GO:0003723	1	RNA binding		√
	GO:0008270	1	zinc ion binding		√
	GO:0035538	1	carbohydrate response element binding
	GO:0019901	1	protein kinase binding
	GO:0046872	2	metal ion binding
	GO:0046873	1	metal ion transmembrane transporter activity
	GO:0005385	1	zinc ion transmembrane transporter activity
	GO:0047627	1	adenylylsulfatase activity
	GO:0005524	1	ATP binding
biological process (560)	GO:0001708	2	cell fate specification
	GO:0009957	2	epidermal cell fate specification
	GO:0009867	2	jasmonic acid mediated signaling pathway
	GO:0007275	8	multicellular organismal development					√																√
	GO:0031542	2	positive regulation of anthocyanin biosynthetic process
	GO:0006351	127	transcription, DNA-templated				√		√	√	√	√			√	√	√		√		√	√	√		√	√	√	√	√	√	√	√	√	√	√	√	√		√	√	√	√	√	√	√	√	√	√	√
	GO:0010091	2	trichome branching
	GO:0010026	2	trichome differentiation
	GO:0006260	1	DNA replication
	GO:0009150	2	purine ribonucleotide metabolic process																																											√
	GO:0006355	112	regulation of transcription, DNA-templated				√	√	√	√	√	√	√	√	√	√	√	√	√	√		√	√	√					√	√	√	√	√				√		√	√				√	√				√
	GO:0006790	1	sulfur compound metabolic process
	GO:0006366	23	transcription from RNA polymerase II promoter					√					√	√				√		√				√														√
	GO:0010200	2	response to chitin
	GO:0010374	3	stomatal complex development																						√	√
	GO:0080147	2	root hair cell development
	GO:0006357	8	regulation of transcription from RNA polymerase II promoter																																				√	√
	GO:0006882	1	cellular zinc ion homeostasis
	GO:0061088	1	regulation of sequestering of zinc ion
	GO:0010043	1	response to zinc ion
	GO:0006829	1	zinc II ion transport
	GO:0009451	1	RNA modification		√
	GO:0009567	5	double fertilization forming a zygote and endosperm					√																√
	GO:0031347	3	regulation of defense response					√																√
	GO:0009704	4	de-etiolation																												√	√									√
	GO:0009585	4	red, far-red light phototransduction																												√	√									√
	GO:0009416	2	response to light stimulus																												√	√
	GO:0010161	4	red light signaling pathway												√	√																									√
	GO:0010017	2	red or far-red light signaling pathway																																						√
	GO:0010600	2	regulation of auxin biosynthetic process																																						√
	GO:0010928	2	regulation of auxin mediated signaling pathway																																						√
	GO:0010244	2	response to low fluence blue light stimulus by blue low-fluence system																																						√
	GO:0009738	1	abscisic acid-activated signaling pathway
	GO:0009963	1	positive regulation of flavonoid biosynthetic process
	GO:0045893	8	positive regulation of transcription, DNA-templated																		√							√							√	√
	GO:0051289	1	protein homotetramerization
	GO:2000068	1	regulation of defense response to insect
	GO:0051090	1	regulation of sequence-specific DNA binding transcription factor activity
	GO:0043619	1	regulation of transcription from RNA polymerase II promoter in response to oxidative stress
	GO:0009737	1	response to abscisic acid
	GO:0009269	1	response to desiccation
	GO:0009753	1	response to jasmonic acid
	GO:0009611	1	response to wounding
	GO:0009739	2	response to gibberellin																								√
	GO:0009742	1	brassinosteroid mediated signaling pathway																																										√
	GO:0009740	2	gibberellic acid mediated signaling pathway												√																														√
	GO:0040008	6	regulation of growth																																										√				√
	GO:0009793	5	embryo development ending in seed dormancy
	GO:0009908	1	flower development
	GO:0009911	1	positive regulation of flower development
	GO:0009637	4	response to blue light																																														√
	GO:0009913	2	epidermal cell differentiation																						√	√
	GO:0010052	1	guard cell differentiation																		√
	GO:0010377	1	guard cell fate commitment																		√
	GO:0010444	1	guard mother cell differentiation																		√
	GO:0051782	1	negative regulation of cell division																		√
	GO:0061086	1	negative regulation of histone H3-K27 methylation																		√
	GO:0045597	1	positive regulation of cell differentiation																		√
	GO:0010106	2	cellular response to iron ion starvation
	GO:0055072	2	iron ion homeostasis
	GO:0010119	1	regulation of stomatal movement																	√
	GO:0010629	5	negative regulation of gene expression						√	√
	GO:0015995	1	chlorophyll biosynthetic process												√
	GO:0006783	2	heme biosynthetic process												√	√
	GO:0009959	2	negative gravitropism												√	√
	GO:0010100	2	negative regulation of photomorphogenesis												√	√
	GO:0010187	6	negative regulation of seed germination												√	√																															√	√
	GO:0010099	2	regulation of photomorphogenesis												√	√
	GO:0010029	2	regulation of seed germination												√	√
	GO:0019760	4	glucosinolate metabolic process																																		√
	GO:0032922	1	circadian regulation of gene expression
	GO:0045599	1	negative regulation of fat cell differentiation
	GO:2000323	1	negative regulation of glucocorticoid receptor signaling pathway
	GO:0032007	1	negative regulation of TOR signaling
	GO:0045892	1	negative regulation of transcription, DNA-templated
	GO:0090403	1	oxidative stress-induced premature senescence
	GO:0090263	1	positive regulation of canonical Wnt signaling pathway
	GO:0042753	1	positive regulation of circadian rhythm
	GO:1901985	1	positive regulation of protein acetylation
	GO:2001016	1	positive regulation of skeletal muscle cell differentiation
	GO:0043161	1	proteasome-mediated ubiquitin-dependent protein catabolic process
	GO:0051726	1	regulation of cell cycle
	GO:2000772	1	regulation of cellular senescence
	GO:0042634	1	regulation of hair cycle
	GO:0050796	1	regulation of insulin secretion
	GO:0050767	1	regulation of neurogenesis
	GO:2000074	1	regulation of type B pancreatic cell development
	GO:0051775	1	response to redox state
	GO:0007283	1	spermatogenesis
	GO:0042335	2	cuticle development										√	√
	GO:0042538	1	hyperosmotic salinity response
	GO:0045487	3	gibberellin catabolic process
	GO:0010371	3	regulation of gibberellin biosynthetic process
	GO:0009409	7	response to cold																									√							√	√											√	√
	GO:0050826	3	response to freezing																									√							√	√
	GO:0010440	3	stomatal lineage progression																									√							√	√
	GO:0048440	4	carpel development																																												√	√
	GO:0007623	4	circadian rhythm																																												√	√
	GO:0010154	4	fruit development																																												√	√
	GO:0010114	4	response to red light																																												√	√
	GO:0048446	1	petal morphogenesis
	GO:0048462	3	carpel formation																																											√
	GO:0010468	2	regulation of gene expression
	GO:0010500	3	transmitting tissue development																																											√
	GO:0080126	1	ovary septum development																																											√
	GO:0048573	5	photoperiodism, flowering
	GO:0048657	4	anther wall tapetum cell differentiation
	GO:0048658	11	anther wall tapetum development
	GO:0009555	10	pollen development
	GO:0052543	6	callose deposition in cell wall
	GO:0050832	2	defense response to fungus																																				√	√
	GO:0055046	1	microgametogenesis
	GO:0048235	1	pollen sperm cell differentiation
	GO:0048765	1	root hair cell differentiation
	GO:0048767	1	root hair elongation
	GO:0071333	3	cellular response to glucose stimulus																			√	√
	GO:0097009	1	energy homeostasis
	GO:0055089	1	fatty acid homeostasis
	GO:0006110	1	regulation of glycolytic process
	GO:0009749	1	response to glucose
	GO:0071369	5	cellular response to ethylene stimulus
	GO:0071281	5	cellular response to iron ion
	GO:0071732	5	cellular response to nitric oxide
	GO:0034756	5	regulation of iron ion transport
	GO:0010039	5	response to iron ion
	GO:2000488	3	positive regulation of brassinosteroid biosynthetic process
	GO:0009813	1	flavonoid biosynthetic process				√
[truncated: 111 more columns]

## Sheet: TableS8
Table S8. Cis-elements analyses of the bHLH proteins in L. chinense
ID	Name of cis-element	Sequences of the cis-element	Function of the cis-element
LcbHLH1	MYB	TAACCA	Unknown
LcbHLH1	ABRE	ACGTG	cis-acting element involved in the abscisic acid responsiveness
LcbHLH1	TC-rich repeats	ATTCTCTAAC	cis-acting element involved in defense and stress responsiveness
LcbHLH1	TCCC-motif	TCTCCCT	part of a light responsive element
LcbHLH1	AuxRR-core	GGTCCAT	cis-acting regulatory element involved in auxin responsiveness
LcbHLH1	MBS	CAACTG	MYB binding site involved in drought-inducibility
LcbHLH1	Box 4	ATTAAT	part of a conserved DNA module involved in light responsiveness
LcbHLH1	Unnamed__1	CGTGG	Unknown
LcbHLH1	CAAT-box	CAAT	Unknown
LcbHLH1	CCAAT-box	CAACGG	MYBHv1 binding site
LcbHLH1	MSA-like	TCCAACGGT	cis-acting element involved in cell cycle regulation
LcbHLH1	WRE3	CCACCT	Unknown
LcbHLH1	L-box	ATCCCACCTAC	part of a light responsive element
LcbHLH1	ARE	AAACCA	cis-acting regulatory element essential for the anaerobic induction
LcbHLH1	AAGAA-motif	GAAAGAA	Unknown
LcbHLH1	Myb-binding site	CAACAG	Unknown
LcbHLH1	Box III	atCATTTTCACt	protein binding site
LcbHLH1	TCT-motif	TCTTAC	part of a light responsive element
LcbHLH1	GATA-motif	AAGGATAAGG	part of a light responsive element
LcbHLH1	AT~TATA-box	TATATAAA	Unknown
LcbHLH1	TATA-box	taTATAAAtc	core promoter element around -30 of transcription start
LcbHLH1	GT1-motif	GGTTAAT	light responsive element
LcbHLH1	DRE core	GCCGAC	Unknown
LcbHLH1	CGTCA-motif	CGTCA	cis-acting regulatory element involved in the MeJA-responsiveness
LcbHLH1	ABRE2	CCACGTGG	Unknown
LcbHLH1	MYB-like sequence	TAACCA	Unknown
LcbHLH1	G-box	TACGTG	cis-acting regulatory element involved in light responsiveness
LcbHLH1	MYB recognition site	CCGTTG	Unknown
LcbHLH1	STRE	AGGGG	Unknown
LcbHLH1	ABRE4	CACGTA	Unknown
LcbHLH1	ABRE3a	TACGTG	Unknown
LcbHLH1	GARE-motif	TCTGTTG	gibberellin-responsive element
LcbHLH1	as-1	TGACG	Unknown
LcbHLH1	TGACG-motif	TGACG	cis-acting regulatory element involved in the MeJA-responsiveness
LcbHLH1	Unnamed__4	CTCC	Unknown
LcbHLH1	TCA	TCATCTTCAT	Unknown
LcbHLH2	GARE-motif	TCTGTTG	gibberellin-responsive element
LcbHLH2	ABRE3a	TACGTG	Unknown
LcbHLH2	Unnamed__4	CTCC	Unknown
LcbHLH2	TCA	TCATCTTCAT	Unknown
LcbHLH2	as-1	TGACG	Unknown
LcbHLH2	TGACG-motif	TGACG	cis-acting regulatory element involved in the MeJA-responsiveness
LcbHLH2	MYB recognition site	CCGTTG	Unknown
LcbHLH2	STRE	AGGGG	Unknown
LcbHLH2	ABRE4	CACGTA	Unknown
LcbHLH2	G-Box	CACGTG	cis-acting regulatory element involved in light responsiveness
LcbHLH2	Myb	TAACTG	Unknown
LcbHLH2	CGTCA-motif	CGTCA	cis-acting regulatory element involved in the MeJA-responsiveness
LcbHLH2	MYB-like sequence	TAACCA	Unknown
LcbHLH2	ABRE2	CCACGTGG	Unknown
LcbHLH2	DRE core	GCCGAC	Unknown
LcbHLH2	GT1-motif	GGTTAAT	light responsive element
LcbHLH2	GATA-motif	AAGGATAAGG	part of a light responsive element
LcbHLH2	TCT-motif	TCTTAC	part of a light responsive element
LcbHLH2	AT~TATA-box	TATATAAA	Unknown
LcbHLH2	TATA-box	taTATAAAtc	core promoter element around -30 of transcription start
LcbHLH2	AAGAA-motif	GAAAGAA	Unknown
LcbHLH2	Myb-binding site	CAACAG	Unknown
LcbHLH2	ARE	AAACCA	cis-acting regulatory element essential for the anaerobic induction
LcbHLH2	Box III	atCATTTTCACt	protein binding site
LcbHLH2	Unnamed__1	CGTGG	Unknown
LcbHLH2	CAAT-box	CAAT	Unknown
LcbHLH2	L-box	ATCCCACCTAC	part of a light responsive element
LcbHLH2	CCAAT-box	CAACGG	MYBHv1 binding site
LcbHLH2	MSA-like	TCCAACGGT	cis-acting element involved in cell cycle regulation
LcbHLH2	WRE3	CCACCT	Unknown
LcbHLH2	ABRE	ACGTG	cis-acting element involved in the abscisic acid responsiveness
LcbHLH2	TC-rich repeats	ATTCTCTAAC	cis-acting element involved in defense and stress responsiveness
LcbHLH2	Box 4	ATTAAT	part of a conserved DNA module involved in light responsiveness
LcbHLH2	AuxRR-core	GGTCCAT	cis-acting regulatory element involved in auxin responsiveness
LcbHLH2	TCCC-motif	TCTCCCT	part of a light responsive element
LcbHLH2	MBS	CAACTG	MYB binding site involved in drought-inducibility
LcbHLH3	Box III	atCATTTTCACt	protein binding site
LcbHLH3	ARE	AAACCA	cis-acting regulatory element essential for the anaerobic induction
LcbHLH3	AAGAA-motif	GAAAGAA	Unknown
LcbHLH3	Myb-binding site	CAACAG	Unknown
LcbHLH3	AT~TATA-box	TATATAAA	Unknown
LcbHLH3	TATA-box	taTATAAAtc	core promoter element around -30 of transcription start
LcbHLH3	GATA-motif	AAGGATAAGG	part of a light responsive element
LcbHLH3	AuxRR-core	GGTCCAT	cis-acting regulatory element involved in auxin responsiveness
LcbHLH3	TCCC-motif	TCTCCCT	part of a light responsive element
LcbHLH3	MBS	CAACTG	MYB binding site involved in drought-inducibility
LcbHLH3	Box 4	ATTAAT	part of a conserved DNA module involved in light responsiveness
LcbHLH3	MYB	TAACCA	Unknown
LcbHLH3	TC-rich repeats	ATTCTCTAAC	cis-acting element involved in defense and stress responsiveness
LcbHLH3	ABRE	ACGTG	cis-acting element involved in the abscisic acid responsiveness
LcbHLH3	MSA-like	TCCAACGGT	cis-acting element involved in cell cycle regulation
LcbHLH3	CCAAT-box	CAACGG	MYBHv1 binding site
LcbHLH3	WRE3	CCACCT	Unknown
LcbHLH3	L-box	ATCCCACCTAC	part of a light responsive element
LcbHLH3	Unnamed__1	CGTGG	Unknown
LcbHLH3	CAAT-box	CAAT	Unknown
LcbHLH3	ABRE4	CACGTA	Unknown
LcbHLH3	G-Box	CACGTG	cis-acting regulatory element involved in light responsiveness
LcbHLH3	MYB recognition site	CCGTTG	Unknown
LcbHLH3	STRE	AGGGG	Unknown
LcbHLH3	as-1	TGACG	Unknown
LcbHLH3	TGACG-motif	TGACG	cis-acting regulatory element involved in the MeJA-responsiveness
LcbHLH3	Unnamed__4	CTCC	Unknown
LcbHLH3	TCA	TCATCTTCAT	Unknown
LcbHLH3	ABRE3a	TACGTG	Unknown
LcbHLH3	GARE-motif	TCTGTTG	gibberellin-responsive element
LcbHLH3	GT1-motif	GGTTAAT	light responsive element
LcbHLH3	DRE core	GCCGAC	Unknown
LcbHLH3	ABRE2	CCACGTGG	Unknown
LcbHLH3	MYB-like sequence	TAACCA	Unknown
LcbHLH3	CGTCA-motif	CGTCA	cis-acting regulatory element involved in the MeJA-responsiveness
LcbHLH4	TCCC-motif	TCTCCCT	part of a light responsive element
LcbHLH4	MBS	CAACTG	MYB binding site involved in drought-inducibility
LcbHLH4	Box 4	ATTAAT	part of a conserved DNA module involved in light responsiveness
LcbHLH4	MYB	TAACCA	Unknown
LcbHLH4	ABRE	ACGTG	cis-acting element involved in the abscisic acid responsiveness
LcbHLH4	WRE3	CCACCT	Unknown
LcbHLH4	Unnamed__1	GAATTTAATTAA	60K protein binding site
LcbHLH4	motif I	gGTACGTGGCG	cis-acting regulatory element root specific
LcbHLH4	CAAT-box	CAAT	Unknown
LcbHLH4	AAAC-motif	CAATCAAAACCT	light responsive element
LcbHLH4	CCGTCC motif	CCGTCC	Unknown
LcbHLH4	Unnamed__6	taTAAATATct	Unknown
LcbHLH4	ARE	AAACCA	cis-acting regulatory element essential for the anaerobic induction
LcbHLH4	Myc	TCTCTTA	Unknown
LcbHLH4	CCGTCC-box	CCGTCC	Unknown
LcbHLH4	AAGAA-motif	gGTAAAGAAA	Unknown
LcbHLH4	ERE	ATTTTAAA	Unknown
LcbHLH4	AT~TATA-box	TATATA	Unknown
LcbHLH4	TATA-box	TATAAAA	core promoter element around -30 of transcription start
LcbHLH4	TCT-motif	TCTTAC	part of a light responsive element
LcbHLH4	GT1-motif	GGTTAAT	light responsive element
LcbHLH4	TATA	TATAAAAT	Unknown
LcbHLH4	Sp1	GGGCGG	light responsive element
LcbHLH4	Unnamed__2	CCCCGG	Unknown
LcbHLH4	G-box	TACGTG	cis-acting regulatory element involved in light responsiveness
LcbHLH4	MYB-like sequence	TAACCA	Unknown
LcbHLH4	CGTCA-motif	CGTCA	cis-acting regulatory element involved in the MeJA-responsiveness
LcbHLH4	chs-CMA1a	TTACTTAA	part of a light responsive element
LcbHLH4	ABRE4	CACGTA	Unknown
LcbHLH4	STRE	AGGGG	Unknown
LcbHLH4	as-1	TGACG	Unknown
LcbHLH4	A-box	CCGTCC	cis-acting regulatory element
LcbHLH4	TGACG-motif	TGACG	cis-acting regulatory element involved in the MeJA-responsiveness
LcbHLH4	Unnamed__4	CTCC	Unknown
LcbHLH4	ABRE3a	TACGTG	Unknown
LcbHLH5	ERE	ATTTCATA	Unknown
LcbHLH5	WUN-motif	CAATTACAT	Unknown
LcbHLH5	TATA-box	ATTATA	core promoter element around -30 of transcription start
LcbHLH5	MYC	CATTTG	Unknown
LcbHLH5	GATA-motif	GATAGGA	part of a light responsive element
LcbHLH5	ARE	AAACCA	cis-acting regulatory element essential for the anaerobic induction
LcbHLH5	AAGAA-motif	gGTAAAGAAA	Unknown
LcbHLH5	Myb-binding site	CAACAG	Unknown
LcbHLH5	WRE3	CCACCT	Unknown
LcbHLH5	CAAT-box	CAAAT	common cis-acting element in promoter and enhancer regions
LcbHLH5	MBS	CAACTG	MYB binding site involved in drought-inducibility
LcbHLH5	ACA-motif	AATTACAGCCATT	part of gapA in (gapA-CMA1) involved with light responsiveness
LcbHLH5	MYB	CAACAG	Unknown
LcbHLH5	ABRE	ACGTG	cis-acting element involved in the abscisic acid responsiveness
LcbHLH5	I-box	TAGATAACC	part of a light responsive element
LcbHLH5	as-1	TGACG	Unknown
LcbHLH5	TGACG-motif	TGACG	cis-acting regulatory element involved in the MeJA-responsiveness
LcbHLH5	Unnamed__4	CTCC	Unknown
LcbHLH5	G-Box	CACGTT	cis-acting regulatory element involved in light responsiveness
LcbHLH5	STRE	AGGGG	Unknown
LcbHLH5	MYB-like sequence	TAACCA	Unknown
LcbHLH5	CGTCA-motif	CGTCA	cis-acting regulatory element involved in the MeJA-responsiveness
LcbHLH5	O2-site	GTTGACGTGA	cis-acting regulatory element involved in zein metabolism regulation
LcbHLH5	AT-rich element	ATAGAAATCAA	binding site of AT-rich DNA binding protein (ATBP-1)
LcbHLH5	RY-element	CATGCATG	cis-acting regulatory element involved in seed-specific regulation
LcbHLH5	LAMP-element	CTTTATCA	part of a light responsive element
LcbHLH5	TATA	TATAAAAT	Unknown
LcbHLH5	Unnamed__2	CCCCGG	Unknown
LcbHLH6	CCGTCC-box	CCGTCC	Unknown
LcbHLH6	box S	AGCCACC	Unknown
LcbHLH6	ARE	AAACCA	cis-acting regulatory element essential for the anaerobic induction
LcbHLH6	CCGTCC motif	CCGTCC	Unknown
LcbHLH6	W box	TTGACC	Unknown
LcbHLH6	CARE	CAACTCAC	Unknown
LcbHLH6	H-box	CCTACCNNNNNNNCTNNNNA	Unknown
LcbHLH6	GATA-motif	GATAGGG	part of a light responsive element
LcbHLH6	TCT-motif	TCTTAC	part of a light responsive element
LcbHLH6	MYC	CATTTG	Unknown
LcbHLH6	TATA-box	ATTATA	core promoter element around -30 of transcription start
LcbHLH6	MRE	AACCTAA	MYB binding site involved in light responsiveness
LcbHLH6	MYB	TAACCA	Unknown
LcbHLH6	Box 4	ATTAAT	part of a conserved DNA module involved in light responsiveness
LcbHLH6	MBS	CAACTG	MYB binding site involved in drought-inducibility
LcbHLH6	Unnamed__1	CGTGG	Unknown
LcbHLH6	CAAT-box	CAAT	Unknown
LcbHLH6	WRE3	CCACCT	Unknown
LcbHLH6	STRE	AGGGG	Unknown
LcbHLH6	circadian	CAAAGATATC	cis-acting regulatory element involved in circadian control
LcbHLH6	LTR	CCGAAA	cis-acting element involved in low-temperature responsiveness
LcbHLH6	Unnamed__4	CTCC	Unknown
LcbHLH6	F-box	CTATTCTCATT	Unknown
LcbHLH6	as-1	TGACG	Unknown
LcbHLH6	A-box	CCGTCC	cis-acting regulatory element
LcbHLH6	TGACG-motif	TGACG	cis-acting regulatory element involved in the MeJA-responsiveness
LcbHLH6	GT1-motif	GGTTAA	light responsive element
LcbHLH6	TATA	TATAAAAT	Unknown
LcbHLH6	CGTCA-motif	CGTCA	cis-acting regulatory element involved in the MeJA-responsiveness
LcbHLH6	AC-I	(T/C)C(T/C)(C/T)ACC(T/C)ACC	Unknown
LcbHLH6	MYB-like sequence	TAACCA	Unknown
LcbHLH6	ATCT-motif	AATCTAATCC	part of a conserved DNA module involved in light responsiveness
LcbHLH7	MYB-like sequence	TAACCA	Unknown
LcbHLH7	ATCT-motif	AATCTAATCC	part of a conserved DNA module involved in light responsiveness
LcbHLH7	LAMP-element	CTTTATCA	part of a light responsive element
LcbHLH7	TATA	TATAAAAT	Unknown
LcbHLH7	GT1-motif	GGTTAA	light responsive element
LcbHLH7	TCA	TCATCTTCAT	Unknown
LcbHLH7	Unnamed__4	CTCC	Unknown
LcbHLH7	LTR	CCGAAA	cis-acting element involved in low-temperature responsiveness
LcbHLH7	AT-rich sequence	TAAAATACT	element for maximal elicitor-mediated activation (2copies)
LcbHLH7	GC-motif	CCCCCG	enhancer-like element involved in anoxic specific inducibility
LcbHLH7	DRE1	ACCGAGA	Unknown
LcbHLH7	ATC-motif	AGTAATCT	part of a conserved DNA module involved in light responsiveness
LcbHLH7	STRE	AGGGG	Unknown
LcbHLH7	WRE3	CCACCT	Unknown
LcbHLH7	TATC-box	TATCCCA	cis-acting element involved in gibberellin-responsiveness
LcbHLH7	CAAT-box	CCAAT	common cis-acting element in promoter and enhancer regions
LcbHLH7	TCCC-motif	TCTCCCT	part of a light responsive element
LcbHLH7	TC-rich repeats	ATTCTCTAAC	cis-acting element involved in defense and stress responsiveness
LcbHLH7	MYB	TAACCA	Unknown
LcbHLH7	MYC	CAATTG	Unknown
LcbHLH7	TATA-box	TATA	core promoter element around -30 of transcription start
LcbHLH7	AT~TATA-box	TATATA	Unknown
LcbHLH7	WUN-motif	AAATTTCCT	wound-responsive element
LcbHLH7	ERE	ATTTCATA	Unknown
LcbHLH7	TCT-motif	TCTTAC	part of a light responsive element
LcbHLH7	W box	TTGACC	Unknown
LcbHLH7	Unnamed__6	taTAAATATct	Unknown
LcbHLH7	CAT-box	GCCACT	cis-acting regulatory element related to meristem expression
LcbHLH7	ARE	AAACCA	cis-acting regulatory element essential for the anaerobic induction
LcbHLH8	MYB-like sequence	TAACCA	Unknown
LcbHLH8	ATCT-motif	AATCTAATCC	part of a conserved DNA module involved in light responsiveness
LcbHLH8	LAMP-element	CTTTATCA	part of a light responsive element
LcbHLH8	TATA	TATAAAAT	Unknown
LcbHLH8	GT1-motif	GGTTAA	light responsive element
LcbHLH8	Unnamed__4	CTCC	Unknown
LcbHLH8	TCA	TCATCTTCAT	Unknown
LcbHLH8	AT-rich sequence	TAAAATACT	element for maximal elicitor-mediated activation (2copies)
LcbHLH8	LTR	CCGAAA	cis-acting element involved in low-temperature responsiveness
LcbHLH8	GC-motif	CCCCCG	enhancer-like element involved in anoxic specific inducibility
LcbHLH8	DRE1	ACCGAGA	Unknown
LcbHLH8	ATC-motif	AGTAATCT	part of a conserved DNA module involved in light responsiveness
LcbHLH8	STRE	AGGGG	Unknown
LcbHLH8	TATC-box	TATCCCA	cis-acting element involved in gibberellin-responsiveness
LcbHLH8	WRE3	CCACCT	Unknown
LcbHLH8	CAAT-box	CAAAT	common cis-acting element in promoter and enhancer regions
LcbHLH8	TCCC-motif	TCTCCCT	part of a light responsive element
LcbHLH8	TC-rich repeats	ATTCTCTAAC	cis-acting element involved in defense and stress responsiveness
LcbHLH8	MYB	TAACCA	Unknown
LcbHLH8	AT~TATA-box	TATATA	Unknown
LcbHLH8	TATA-box	TATA	core promoter element around -30 of transcription start
LcbHLH8	MYC	CAATTG	Unknown
LcbHLH8	ERE	ATTTCATA	Unknown
LcbHLH8	TCT-motif	TCTTAC	part of a light responsive element
LcbHLH8	Unnamed__6	taTAAATATct	Unknown
LcbHLH8	W box	TTGACC	Unknown
LcbHLH8	CAT-box	GCCACT	cis-acting regulatory element related to meristem expression
LcbHLH8	ARE	AAACCA	cis-acting regulatory element essential for the anaerobic induction
LcbHLH9	ARE	AAACCA	cis-acting regulatory element essential for the anaerobic induction
LcbHLH9	AAGAA-motif	GAAAGAA	Unknown
LcbHLH9	CAT-box	GCCACT	cis-acting regulatory element related to meristem expression
LcbHLH9	Box III	atCATTTTCACt	protein binding site
LcbHLH9	W box	TTGACC	Unknown
LcbHLH9	TCT-motif	TCTTAC	part of a light responsive element
LcbHLH9	GATA-motif	AAGGATAAGG	part of a light responsive element
LcbHLH9	WUN-motif	CCATTTCAA	Unknown
LcbHLH9	AT~TATA-box	TATATA	Unknown
LcbHLH9	TATA-box	ATTATA	core promoter element around -30 of transcription start
LcbHLH9	MYC	CATTTG	Unknown
LcbHLH9	MYB	CAACCA	Unknown
LcbHLH9	TCCC-motif	TCTCCCT	part of a light responsive element
LcbHLH9	MBS	CAACTG	MYB binding site involved in drought-inducibility
LcbHLH9	Box 4	ATTAAT	part of a conserved DNA module involved in light responsiveness
LcbHLH9	CAAT-box	CCAAT	common cis-acting element in promoter and enhancer regions
LcbHLH9	WRE3	CCACCT	Unknown
LcbHLH9	L-box	ATCCCACCTAC	part of a light responsive element
LcbHLH9	STRE	AGGGG	Unknown
LcbHLH9	as-1	TGACG	Unknown
LcbHLH9	TGACG-motif	TGACG	cis-acting regulatory element involved in the MeJA-responsiveness
LcbHLH9	Unnamed__4	CTCC	Unknown
LcbHLH9	TCA	TCATCTTCAT	Unknown
LcbHLH9	TATA	TATAAAAT	Unknown
LcbHLH9	GA-motif	ATAGATAA	part of a light responsive element
LcbHLH9	AC-I	(T/C)C(T/C)(C/T)ACC(T/C)ACC	Unknown
LcbHLH9	CGTCA-motif	CGTCA	cis-acting regulatory element involved in the MeJA-responsiveness
LcbHLH9	O2-site	GATGACATGG	cis-acting regulatory element involved in zein metabolism regulation
LcbHLH10	TGACG-motif	TGACG	cis-acting regulatory element involved in the MeJA-responsiveness
LcbHLH10	as-1	TGACG	Unknown
LcbHLH10	Unnamed__4	CTCC	Unknown
LcbHLH10	STRE	AGGGG	Unknown
LcbHLH10	CGTCA-motif	CGTCA	cis-acting regulatory element involved in the MeJA-responsiveness
LcbHLH10	AC-I	(T/C)C(T/C)(C/T)ACC(T/C)ACC	Unknown
LcbHLH10	Myb	CAACTG	Unknown
LcbHLH10	GA-motif	ATAGATAA	part of a light responsive element
LcbHLH10	TATA	TATAAAAT	Unknown
LcbHLH10	WUN-motif	CCATTTCAA	Unknown
LcbHLH10	TATA-box	ATATAA	core promoter element around -30 of transcription start
LcbHLH10	MYC	CATTTG	Unknown
LcbHLH10	AT~TATA-box	TATATA	Unknown
LcbHLH10	TCT-motif	TCTTAC	part of a light responsive element
LcbHLH10	GATA-motif	AAGGATAAGG	part of a light responsive element
LcbHLH10	Box III	atCATTTTCACt	protein binding site
LcbHLH10	CAT-box	GCCACT	cis-acting regulatory element related to meristem expression
LcbHLH10	W box	TTGACC	Unknown
LcbHLH10	ARE	AAACCA	cis-acting regulatory element essential for the anaerobic induction
LcbHLH10	AAGAA-motif	GAAAGAA	Unknown
LcbHLH10	WRE3	CCACCT	Unknown
LcbHLH10	L-box	ATCCCACCTAC	part of a light responsive element
LcbHLH10	CAAT-box	CAAAT	common cis-acting element in promoter and enhancer regions
LcbHLH10	3-AF1 binding site	TAAGAGAGGAA	light responsive element
LcbHLH10	MBS	CAACTG	MYB binding site involved in drought-inducibility
LcbHLH10	TCCC-motif	TCTCCCT	part of a light responsive element
LcbHLH10	Box 4	ATTAAT	part of a conserved DNA module involved in light responsiveness
LcbHLH11	MYB-like sequence	TAACCA	Unknown
LcbHLH11	G-box	CACGTC	cis-acting regulatory element involved in light responsiveness
LcbHLH11	O2-site	GATGA(C/T)(A/G)TG(A/G)	cis-acting regulatory element involved in zein metabolism regulation
LcbHLH11	Myb	TAACTG	Unknown
LcbHLH11	CGTCA-motif	CGTCA	cis-acting regulatory element involved in the MeJA-responsiveness
LcbHLH11	LAMP-element	CTTTATCA	part of a light responsive element
LcbHLH11	DRE core	GCCGAC	Unknown
LcbHLH11	TATA	TATAAAAT	Unknown
LcbHLH11	TCA	TCATCTTCAT	Unknown
LcbHLH11	Unnamed__4	CTCC	Unknown
LcbHLH11	TGACG-motif	TGACG	cis-acting regulatory element involved in the MeJA-responsiveness
LcbHLH11	as-1	TGACG	Unknown
LcbHLH11	STRE	AGGGG	Unknown
LcbHLH11	MYB recognition site	CCGTTG	Unknown
LcbHLH11	WRE3	CCACCT	Unknown
LcbHLH11	MSA-like	TCCAACGGT	cis-acting element involved in cell cycle regulation
LcbHLH11	CCAAT-box	CAACGG	MYBHv1 binding site
LcbHLH11	CAAT-box	CAAT	Unknown
LcbHLH11	Unnamed__1	CGTGG	Unknown
LcbHLH11	Box 4	ATTAAT	part of a conserved DNA module involved in light responsiveness
LcbHLH11	TCCC-motif	TCTCCCT	part of a light responsive element
LcbHLH11	ABRE	ACGTG	cis-acting element involved in the abscisic acid responsiveness
LcbHLH11	MYC	CATGTG	Unknown
LcbHLH11	TATA-box	TATATA	core promoter element around -30 of transcription start
LcbHLH11	AT~TATA-box	TATATA	Unknown
LcbHLH11	ERE	ATTTTAAA	Unknown
LcbHLH11	CAG-motif	GAAAGGCAGAC	part of a light response element
LcbHLH11	Myb-binding site	CAACAG	Unknown
LcbHLH11	TCA-element	CCATCTTTTT	cis-acting element involved in salicylic acid responsiveness
LcbHLH11	ARE	AAACCA	cis-acting regulatory element essential for the anaerobic induction
LcbHLH11	box S	AGCCACC	Unknown
LcbHLH12	MSA-like	TCCAACGGT	cis-acting element involved in cell cycle regulation
LcbHLH12	CCAAT-box	CAACGG	MYBHv1 binding site
LcbHLH12	WRE3	CCACCT	Unknown
LcbHLH12	Unnamed__1	CGTGG	Unknown
LcbHLH12	CAAT-box	CAAT	Unknown
LcbHLH12	TCCC-motif	TCTCCCT	part of a light responsive element
LcbHLH12	Box 4	ATTAAT	part of a conserved DNA module involved in light responsiveness
LcbHLH12	MYB	TAACCA	Unknown
LcbHLH12	ABRE	ACGTG	cis-acting element involved in the abscisic acid responsiveness
LcbHLH12	ERE	ATTTTAAA	Unknown
LcbHLH12	AT~TATA-box	TATATA	Unknown
LcbHLH12	MYC	CATGTG	Unknown
LcbHLH12	TATA-box	TATATA	core promoter element around -30 of transcription start
LcbHLH12	ARE	AAACCA	cis-acting regulatory element essential for the anaerobic induction
LcbHLH12	box S	AGCCACC	Unknown
LcbHLH12	TCA-element	CCATCTTTTT	cis-acting element involved in salicylic acid responsiveness
LcbHLH12	Myb-binding site	CAACAG	Unknown
LcbHLH12	G-box	CACGTC	cis-acting regulatory element involved in light responsiveness
LcbHLH12	MYB-like sequence	TAACCA	Unknown
LcbHLH12	O2-site	GATGA(C/T)(A/G)TG(A/G)	cis-acting regulatory element involved in zein metabolism regulation
LcbHLH12	CGTCA-motif	CGTCA	cis-acting regulatory element involved in the MeJA-responsiveness
LcbHLH12	LAMP-element	CTTTATCA	part of a light responsive element
LcbHLH12	TATA	TATAAAAT	Unknown
LcbHLH12	DRE core	GCCGAC	Unknown
LcbHLH12	as-1	TGACG	Unknown
LcbHLH12	TGACG-motif	TGACG	cis-acting regulatory element involved in the MeJA-responsiveness
LcbHLH12	Unnamed__4	CTCC	Unknown
LcbHLH12	TCA	TCATCTTCAT	Unknown
LcbHLH12	MYB recognition site	CCGTTG	Unknown
LcbHLH12	STRE	AGGGG	Unknown
LcbHLH13	ATCT-motif	AATCTAATCC	part of a conserved DNA module involved in light responsiveness
LcbHLH13	CGTCA-motif	CGTCA	cis-acting regulatory element involved in the MeJA-responsiveness
LcbHLH13	Myb	TAACTG	Unknown
LcbHLH13	Unnamed__2	AACCTAACCT	Unknown
LcbHLH13	I-box	gGATAAGGTG	part of a light responsive element
LcbHLH13	as-1	TGACG	Unknown
LcbHLH13	TGACG-motif	TGACG	cis-acting regulatory element involved in the MeJA-responsiveness
LcbHLH13	Unnamed__4	CTCC	Unknown
LcbHLH13	LTR	CCGAAA	cis-acting element involved in low-temperature responsiveness
LcbHLH13	STRE	AGGGG	Unknown
LcbHLH13	CAAT-box	CAAT	Unknown
LcbHLH13	TCCC-motif	TCTCCCT	part of a light responsive element
LcbHLH13	Box 4	ATTAAT	part of a conserved DNA module involved in light responsiveness
LcbHLH13	ABRE	TACGGTC	cis-acting element involved in the abscisic acid responsiveness
LcbHLH13	ERE	ATTTTAAA	Unknown
LcbHLH13	WUN-motif	AAATTACTA	Unknown
LcbHLH13	AT~TATA-box	TATATA	Unknown
LcbHLH13	TATA-box	TATTTAAA	core promoter element around -30 of transcription start
LcbHLH13	MYC	CATTTG	Unknown
LcbHLH13	TCT-motif	TCTTAC	part of a light responsive element
LcbHLH13	CAT-box	GCCACT	cis-acting regulatory element related to meristem expression
LcbHLH13	Unnamed__6	taTAAATATct	Unknown
LcbHLH13	W box	TTGACC	Unknown
LcbHLH13	ARE	AAACCA	cis-acting regulatory element essential for the anaerobic induction
LcbHLH13	AAGAA-motif	GAAAGAA	Unknown
LcbHLH13	Myb-binding site	CAACAG	Unknown
LcbHLH14	ATCT-motif	AATCTAATCC	part of a conserved DNA module involved in light responsiveness
LcbHLH14	G-box	TACGTG	cis-acting regulatory element involved in light responsiveness
LcbHLH14	CGTCA-motif	CGTCA	cis-acting regulatory element involved in the MeJA-responsiveness
LcbHLH14	Myb	TAACTG	Unknown
LcbHLH14	TATA	TATAAAAT	Unknown
LcbHLH14	TGACG-motif	TGACG	cis-acting regulatory element involved in the MeJA-responsiveness
LcbHLH14	as-1	TGACG	Unknown
LcbHLH14	I-box	gGATAAGGTG	part of a light responsive element
LcbHLH14	Unnamed__4	CTCC	Unknown
LcbHLH14	ABRE3a	TACGTG	Unknown
LcbHLH14	LTR	CCGAAA	cis-acting element involved in low-temperature responsiveness
LcbHLH14	TGA-element	AACGAC	auxin-responsive element
LcbHLH14	ABRE4	CACGTA	Unknown
LcbHLH14	STRE	AGGGG	Unknown
LcbHLH14	MYB recognition site	CCGTTG	Unknown
LcbHLH14	WRE3	CCACCT	Unknown
LcbHLH14	CCAAT-box	CAACGG	MYBHv1 binding site
LcbHLH14	CAAT-box	CAAAT	common cis-acting element in promoter and enhancer regions
LcbHLH14	ACE	GACACGTATG	cis-acting element involved in light responsiveness
LcbHLH14	TCCC-motif	TCTCCCT	part of a light responsive element
LcbHLH14	Box 4	ATTAAT	part of a conserved DNA module involved in light responsiveness
LcbHLH14	ABRE	ACGTG	cis-acting element involved in the abscisic acid responsiveness
LcbHLH14	WUN-motif	CCATTTCAA	Unknown
LcbHLH14	ERE	ATTTTAAA	Unknown
LcbHLH14	MYC	CATTTG	Unknown
LcbHLH14	TATA-box	ATATAT	core promoter element around -30 of transcription start
LcbHLH14	AT~TATA-box	TATATA	Unknown
LcbHLH14	TCT-motif	TCTTAC	part of a light responsive element
LcbHLH14	GATA-motif	GATAGGA	part of a light responsive element
LcbHLH14	CAT-box	GCCACT	cis-acting regulatory element related to meristem expression
LcbHLH14	AAGAA-motif	GAAAGAA	Unknown
LcbHLH15	TATA	TATAAAAT	Unknown
LcbHLH15	Myb	TAACTG	Unknown
LcbHLH15	CGTCA-motif	CGTCA	cis-acting regulatory element involved in the MeJA-responsiveness
LcbHLH15	GC-motif	CCCCCG	enhancer-like element involved in anoxic specific inducibility
LcbHLH15	STRE	AGGGG	Unknown
LcbHLH15	Unnamed__4	CTCC	Unknown
LcbHLH15	as-1	TGACG	Unknown
LcbHLH15	TGACG-motif	TGACG	cis-acting regulatory element involved in the MeJA-responsiveness
LcbHLH15	LTR	CCGAAA	cis-acting element involved in low-temperature responsiveness
LcbHLH15	Box 4	ATTAAT	part of a conserved DNA module involved in light responsiveness
LcbHLH15	MBS	CAACTG	MYB binding site involved in drought-inducibility
LcbHLH15	AE-box	AGAAACTT	part of a module for light response
LcbHLH15	MRE	AACCTAA	MYB binding site involved in light responsiveness
LcbHLH15	MSA-like	(T/C)C(T/C)AACGG(T/C)(T/C)A	cis-acting element involved in cell cycle regulation
LcbHLH15	WRE3	CCACCT	Unknown
LcbHLH15	Unnamed__1	CGTGG	Unknown
LcbHLH15	CAAT-box	CAAT	Unknown
LcbHLH15	3-AF1 binding site	TAAGAGAGGAA	light responsive element
LcbHLH15	Unnamed__6	taTAAATATct	Unknown
LcbHLH15	Myb-binding site	CAACAG	Unknown
LcbHLH15	ARE	AAACCA	cis-acting regulatory element essential for the anaerobic induction
LcbHLH15	Myc	TCTCTTA	Unknown
LcbHLH15	AT~TATA-box	TATATA	Unknown
LcbHLH15	TATA-box	ATTATA	core promoter element around -30 of transcription start
LcbHLH15	ERE	ATTTTAAA	Unknown
LcbHLH15	TCT-motif	TCTTAC	part of a light responsive element
LcbHLH16	G-Box	CACGTG	cis-acting regulatory element involved in light responsiveness
LcbHLH16	ABRE4	CACGTA	Unknown
LcbHLH16	STRE	AGGGG	Unknown
LcbHLH16	MYB recognition site	CCGTTG	Unknown
LcbHLH16	Unnamed__4	CTCC	Unknown
LcbHLH16	TGACG-motif	TGACG	cis-acting regulatory element involved in the MeJA-responsiveness
LcbHLH16	as-1	TGACG	Unknown
LcbHLH16	TGA-element	AACGAC	auxin-responsive element
LcbHLH16	ABRE3a	TACGTG	Unknown
LcbHLH16	RY-element	CATGCATG	cis-acting regulatory element involved in seed-specific regulation
LcbHLH16	Unnamed__2	AACCTAACCT	Unknown
LcbHLH16	MYB-like sequence	TAACCA	Unknown
LcbHLH16	CGTCA-motif	CGTCA	cis-acting regulatory element involved in the MeJA-responsiveness
LcbHLH16	O2-site	GTTGACGTGA	cis-acting regulatory element involved in zein metabolism regulation
LcbHLH16	W box	TTGACC	Unknown
LcbHLH16	Myb-binding site	CAACAG	Unknown
LcbHLH16	AAGAA-motif	GAAAGAA	Unknown
LcbHLH16	Myc	TCTCTTA	Unknown
LcbHLH16	TATA-box	TACAAAA	core promoter element around -30 of transcription start
LcbHLH16	AT~TATA-box	TATATAAA	Unknown
LcbHLH16	MBSI	aaaAaaC(G/C)GTTA	MYB binding site involved in flavonoid biosynthetic genes regulation
LcbHLH16	Box 4	ATTAAT	part of a conserved DNA module involved in light responsiveness
LcbHLH16	re2f-1	GCGGGAAA	Unknown
LcbHLH16	AuxRR-core	GGTCCAT	cis-acting regulatory element involved in auxin responsiveness
LcbHLH16	AE-box	AGAAACAA	part of a module for light response
LcbHLH16	ABRE	TACGGTC	cis-acting element involved in the abscisic acid responsiveness
LcbHLH16	MYB	CAACCA	Unknown
LcbHLH16	MRE	AACCTAA	MYB binding site involved in light responsiveness
LcbHLH16	TATC-box	TATCCCA	cis-acting element involved in gibberellin-responsiveness
LcbHLH16	CCAAT-box	CAACGG	MYBHv1 binding site
LcbHLH16	MSA-like	TCCAACGGT	cis-acting element involved in cell cycle regulation
LcbHLH16	CAAT-box	CCAAT	common cis-acting element in promoter and enhancer regions
LcbHLH16	Unnamed__1	CGTGG	Unknown
LcbHLH17	STRE	AGGGG	Unknown
LcbHLH17	GC-motif	CCCCCG	enhancer-like element involved in anoxic specific inducibility
LcbHLH17	ABRE4	CACGTA	Unknown
LcbHLH17	ABRE3a	TACGTG	Unknown
LcbHLH17	LTR	CCGAAA	cis-acting element involved in low-temperature responsiveness
LcbHLH17	as-1	TGACG	Unknown
LcbHLH17	TGACG-motif	TGACG	cis-acting regulatory element involved in the MeJA-responsiveness
LcbHLH17	Unnamed__4	CTCC	Unknown
LcbHLH17	TATA	TATAAAAT	Unknown
LcbHLH17	CGTCA-motif	CGTCA	cis-acting regulatory element involved in the MeJA-responsiveness
LcbHLH17	Myb	TAACTG	Unknown
LcbHLH17	G-box	TACGTG	cis-acting regulatory element involved in light responsiveness
LcbHLH17	Myc	TCTCTTA	Unknown
LcbHLH17	ARE	AAACCA	cis-acting regulatory element essential for the anaerobic induction
LcbHLH17	Myb-binding site	CAACAG	Unknown
LcbHLH17	Unnamed__6	taTAAATATct	Unknown
LcbHLH17	TCT-motif	TCTTAC	part of a light responsive element
LcbHLH17	ERE	ATTTTAAA	Unknown
LcbHLH17	AT~TATA-box	TATATA	Unknown
LcbHLH17	TATA-box	ATATAT	core promoter element around -30 of transcription start
LcbHLH17	MRE	AACCTAA	MYB binding site involved in light responsiveness
LcbHLH17	ABRE	ACGTG	cis-acting element involved in the abscisic acid responsiveness
LcbHLH17	AE-box	AGAAACTT	part of a module for light response
LcbHLH17	MBS	CAACTG	MYB binding site involved in drought-inducibility
LcbHLH17	Box 4	ATTAAT	part of a conserved DNA module involved in light responsiveness
LcbHLH17	Unnamed__1	CGTGG	Unknown
LcbHLH17	CAAT-box	CAAT	Unknown
LcbHLH17	MSA-like	(T/C)C(T/C)AACGG(T/C)(T/C)A	cis-acting element involved in cell cycle regulation
LcbHLH17	WRE3	CCACCT	Unknown
LcbHLH18	STRE	AGGGG	Unknown
LcbHLH18	ERE	ATTTCATA	Unknown
LcbHLH18	box S	AGCCACC	Unknown
LcbHLH18	as-1	TGACG	Unknown
LcbHLH18	TC-rich repeats	ATTCTCTAAC	cis-acting element involved in defense and stress responsiveness
LcbHLH18	GCN4_motif	TGAGTCA	cis-regulatory element involved in endosperm expression
LcbHLH18	TGA-element	AACGAC	auxin-responsive element
LcbHLH18	GT1-motif	GGTTAA	light responsive element
LcbHLH18	Unnamed__4	CTCC	Unknown
LcbHLH18	G-box	CACGTG	cis-acting regulatory element involved in light responsiveness
LcbHLH18	chs-CMA1a	TTACTTAA	part of a light responsive element
LcbHLH18	ABRE	CGCACGTGTC	cis-acting element involved in the abscisic acid responsiveness
LcbHLH18	TATA	TATAAAAT	Unknown
LcbHLH18	MYB	TAACCA	Unknown
LcbHLH18	MRE	AACCTAA	MYB binding site involved in light responsiveness
LcbHLH18	AAGAA-motif	GAAAGAA	Unknown
LcbHLH18	TGACG-motif	TGACG	cis-acting regulatory element involved in the MeJA-responsiveness
LcbHLH18	AT~TATA-box	TATATA	Unknown
LcbHLH18	MYB-like sequence	TAACCA	Unknown
LcbHLH18	TCA-element	CCATCTTTTT	cis-acting element involved in salicylic acid responsiveness
LcbHLH18	TCA	TCATCTTCAT	Unknown
LcbHLH18	WRE3	CCACCT	Unknown
LcbHLH18	Unnamed__2	AACCTAACCT	Unknown
LcbHLH18	MYC	CATGTG	Unknown
LcbHLH18	CAAT-box	CAAT	Unknown
LcbHLH18	MBS	CAACTG	MYB binding site involved in drought-inducibility
LcbHLH18	AuxRR-core	GGTCCAT	cis-acting regulatory element involved in auxin responsiveness
LcbHLH18	AE-box	AGAAACTT	part of a module for light response
LcbHLH18	Unnamed__1	GAATTTAATTAA	60K protein binding site
LcbHLH18	CGTCA-motif	CGTCA	cis-acting regulatory element involved in the MeJA-responsiveness
LcbHLH18	W box	TTGACC	Unknown
LcbHLH18	WUN-motif	AAATTTCTT	Unknown
LcbHLH18	GARE-motif	TCTGTTG	gibberellin-responsive element
LcbHLH18	TATA-box	ccTATAAAaa	core promoter element around -30 of transcription start
LcbHLH18	Box 4	ATTAAT	part of a conserved DNA module involved in light responsiveness
LcbHLH18	Myb-binding site	CAACAG	Unknown
LcbHLH19	WRE3	CCACCT	Unknown
LcbHLH19	CAAT-box	CCAAT	common cis-acting element in promoter and enhancer regions
LcbHLH19	MBS	CAACTG	MYB binding site involved in drought-inducibility
LcbHLH19	Myb	CAACTG	Unknown
LcbHLH19	ATC-motif	AGTAATCT	part of a conserved DNA module involved in light responsiveness
LcbHLH19	AT~TATA-box	TATATA	Unknown
LcbHLH19	ABRE4	CACGTA	Unknown
LcbHLH19	O2-site	GTTGACGTGA	cis-acting regulatory element involved in zein metabolism regulation
LcbHLH19	TATA-box	TATA	core promoter element around -30 of transcription start
LcbHLH19	AT~ABRE	TACGTGTC	Unknown
LcbHLH19	Myb-binding site	CAACAG	Unknown
LcbHLH19	Box 4	ATTAAT	part of a conserved DNA module involved in light responsiveness
LcbHLH19	MSA-like	TCCAACGGT	cis-acting element involved in cell cycle regulation
LcbHLH19	AE-box	AGAAACTT	part of a module for light response
LcbHLH19	ARE	AAACCA	cis-acting regulatory element essential for the anaerobic induction
LcbHLH19	CGTCA-motif	CGTCA	cis-acting regulatory element involved in the MeJA-responsiveness
LcbHLH19	WUN-motif	CCATTTCAA	Unknown
LcbHLH19	as-1	TGACG	Unknown
LcbHLH19	TC-rich repeats	ATTCTCTAAC	cis-acting element involved in defense and stress responsiveness
LcbHLH19	Unnamed__4	CTCC	Unknown
LcbHLH19	MYB recognition site	CCGTTG	Unknown
LcbHLH19	ERE	ATTTTAAA	Unknown
LcbHLH19	box S	AGCCACC	Unknown
LcbHLH19	CCAAT-box	CAACGG	MYBHv1 binding site
LcbHLH19	TCT-motif	TCTTAC	part of a light responsive element
LcbHLH19	TATA	TATAAAAT	Unknown
LcbHLH19	ACE	GACACGTATG	cis-acting element involved in light responsiveness
LcbHLH19	TGACG-motif	TGACG	cis-acting regulatory element involved in the MeJA-responsiveness
LcbHLH19	G-box	TACGTG	cis-acting regulatory element involved in light responsiveness
LcbHLH19	Sp1	GGGCGG	light responsive element
LcbHLH19	ABRE3a	TACGTG	Unknown
LcbHLH19	TCCC-motif	TCTCCCT	part of a light responsive element
LcbHLH19	ABRE	TACGTGTC	cis-acting element involved in the abscisic acid responsiveness
LcbHLH20	ERE	ATTTTAAA	Unknown
LcbHLH20	GT1-motif	GGTTAA	light responsive element
LcbHLH20	TC-rich repeats	GTTTTCTTAC	cis-acting element involved in defense and stress responsiveness
LcbHLH20	Unnamed__4	CTCC	Unknown
LcbHLH20	G-box	TACGTG	cis-acting regulatory element involved in light responsiveness
LcbHLH20	ABRE3a	TACGTG	Unknown
LcbHLH20	ABRE	ACGTG	cis-acting element involved in the abscisic acid responsiveness
LcbHLH20	chs-CMA1a	TTACTTAA	part of a light responsive element
LcbHLH20	TATC-box	TATCCCA	cis-acting element involved in gibberellin-responsiveness
LcbHLH20	TATA	TATAAAAT	Unknown
LcbHLH20	MYB	CAACCA	Unknown
LcbHLH20	AAGAA-motif	gGTAAAGAAA	Unknown
LcbHLH20	ABRE4	CACGTA	Unknown
LcbHLH20	AT~TATA-box	TATATA	Unknown
LcbHLH20	O2-site	GATGA(C/T)(A/G)TG(A/G)	cis-acting regulatory element involved in zein metabolism regulation
LcbHLH20	MYB-like sequence	TAACCA	Unknown
LcbHLH20	TCA	TCATCTTCAT	Unknown
LcbHLH20	MYC	CATTTG	Unknown
LcbHLH20	CAAT-box	CAAT	Unknown
LcbHLH20	ARE	AAACCA	cis-acting regulatory element essential for the anaerobic induction
LcbHLH20	LTR	CCGAAA	cis-acting element involved in low-temperature responsiveness
LcbHLH20	Unnamed__1	GAATTTAATTAA	60K protein binding site
LcbHLH20	HD-Zip 1	CAAT(A/T)ATTG	element involved in differentiation of the palisade mesophyll cells
LcbHLH20	WUN-motif	AAATTTCTT	Unknown
LcbHLH20	TATA-box	ATTATA	core promoter element around -30 of transcription start
LcbHLH20	CARE	CAACTCCC	Unknown
LcbHLH20	Box 4	ATTAAT	part of a conserved DNA module involved in light responsiveness
LcbHLH21	AAGAA-motif	gGTAAAGAAA	Unknown
LcbHLH21	TATA	TATAAAAT	Unknown
LcbHLH21	MYB	CAACCA	Unknown
LcbHLH21	TATC-box	TATCCCA	cis-acting element involved in gibberellin-responsiveness
LcbHLH21	chs-CMA1a	TTACTTAA	part of a light responsive element
LcbHLH21	ABRE	CACGTG	cis-acting element involved in the abscisic acid responsiveness
LcbHLH21	G-box	CACGTG	cis-acting regulatory element involved in light responsiveness
LcbHLH21	Unnamed__4	CTCC	Unknown
LcbHLH21	TC-rich repeats	GTTTTCTTAC	cis-acting element involved in defense and stress responsiveness
LcbHLH21	GT1-motif	GGTTAA	light responsive element
LcbHLH21	STRE	AGGGG	Unknown
LcbHLH21	ERE	ATTTTAAA	Unknown
LcbHLH21	Box 4	ATTAAT	part of a conserved DNA module involved in light responsiveness
LcbHLH21	CARE	CAACTCCC	Unknown
LcbHLH21	TATA-box	ATTATA	core promoter element around -30 of transcription start
LcbHLH21	HD-Zip 1	CAAT(A/T)ATTG	element involved in differentiation of the palisade mesophyll cells
LcbHLH21	WUN-motif	AAATTTCTT	Unknown
LcbHLH21	Unnamed__1	GAATTTAATTAA	60K protein binding site
LcbHLH21	LTR	CCGAAA	cis-acting element involved in low-temperature responsiveness
LcbHLH21	ARE	AAACCA	cis-acting regulatory element essential for the anaerobic induction
LcbHLH21	CAAT-box	CCAAT	common cis-acting element in promoter and enhancer regions
LcbHLH21	Myc	TCTCTTA	Unknown
LcbHLH21	TCA	TCATCTTCAT	Unknown
LcbHLH21	O2-site	GATGA(C/T)(A/G)TG(A/G)	cis-acting regulatory element involved in zein metabolism regulation
LcbHLH21	MYB-like sequence	TAACCA	Unknown
LcbHLH21	AT~TATA-box	TATATA	Unknown
LcbHLH22	CAAT-box	CAAT	Unknown
LcbHLH22	MYC	CATGTG	Unknown
LcbHLH22	WRE3	CCACCT	Unknown
LcbHLH22	Unnamed__2	AACCTAACCT	Unknown
LcbHLH22	RY-element	CATGCATG	cis-acting regulatory element involved in seed-specific regulation
LcbHLH22	MYB-like sequence	TAACCA	Unknown
LcbHLH22	AT~TATA-box	TATATA	Unknown
LcbHLH22	Box 4	ATTAAT	part of a conserved DNA module involved in light responsiveness
LcbHLH22	LAMP-element	CTTTATCA	part of a light responsive element
LcbHLH22	TATA-box	ATATAA	core promoter element around -30 of transcription start
LcbHLH22	P-box	CCTTTTG	gibberellin-responsive element
LcbHLH22	I-box	cGATAAGGCG	part of a light responsive element
LcbHLH22	circadian	CAAAGATATC	cis-acting regulatory element involved in circadian control
LcbHLH22	Unnamed__1	GAATTTAATTAA	60K protein binding site
LcbHLH22	GC-motif	CCCCCG	enhancer-like element involved in anoxic specific inducibility
LcbHLH22	LTR	CCGAAA	cis-acting element involved in low-temperature responsiveness
LcbHLH22	AuxRR-core	GGTCCAT	cis-acting regulatory element involved in auxin responsiveness
LcbHLH22	ARE	AAACCA	cis-acting regulatory element essential for the anaerobic induction
LcbHLH22	Unnamed__4	CTCC	Unknown
LcbHLH22	GCN4_motif	TGAGTCA	cis-regulatory element involved in endosperm expression
LcbHLH22	GT1-motif	GGTTAA	light responsive element
LcbHLH22	ERE	ATTTCATA	Unknown
LcbHLH22	AAGAA-motif	gGTAAAGAAA	Unknown
LcbHLH22	ATCT-motif	AATCTAATCC	part of a conserved DNA module involved in light responsiveness
LcbHLH22	MYB	CAACCA	Unknown
LcbHLH22	TATC-box	TATCCCA	cis-acting element involved in gibberellin-responsiveness
LcbHLH22	TCCC-motif	TCTCCCT	part of a light responsive element
LcbHLH22	G-box	CACGAC	cis-acting regulatory element involved in light responsiveness
LcbHLH23	ABRE	ACGTG	cis-acting element involved in the abscisic acid responsiveness
LcbHLH23	TCCC-motif	TCTCCCT	part of a light responsive element
LcbHLH23	G-box	CACGTC	cis-acting regulatory element involved in light responsiveness
LcbHLH23	TGACG-motif	TGACG	cis-acting regulatory element involved in the MeJA-responsiveness
LcbHLH23	CAT-box	GCCACT	cis-acting regulatory element related to meristem expression
LcbHLH23	MYB	TAACCA	Unknown
LcbHLH23	MBSI	aaaAaaC(G/C)GTTA	MYB binding site involved in flavonoid biosynthetic genes regulation
LcbHLH23	GATA-motif	GATAGGG	part of a light responsive element
LcbHLH23	ERE	ATTTTAAA	Unknown
LcbHLH23	Unnamed__4	CTCC	Unknown
LcbHLH23	GT1-motif	GGTTAAT	light responsive element
LcbHLH23	TC-rich repeats	ATTCTCTAAC	cis-acting element involved in defense and stress responsiveness
LcbHLH23	as-1	TGACG	Unknown
LcbHLH23	circadian	CAAAGATATC	cis-acting regulatory element involved in circadian control
LcbHLH23	HD-Zip 1	CAAT(A/T)ATTG	element involved in differentiation of the palisade mesophyll cells
LcbHLH23	WUN-motif	CAATTACAT	Unknown
LcbHLH23	CGTCA-motif	CGTCA	cis-acting regulatory element involved in the MeJA-responsiveness
LcbHLH23	Unnamed__1	CGTGG	Unknown
LcbHLH23	GC-motif	CCCCCG	enhancer-like element involved in anoxic specific inducibility
LcbHLH23	ARE	AAACCA	cis-acting regulatory element essential for the anaerobic induction
LcbHLH23	Unnamed__6	taTAAATATct	Unknown
LcbHLH23	Box 4	ATTAAT	part of a conserved DNA module involved in light responsiveness
LcbHLH23	TATA-box	TATACA	core promoter element around -30 of transcription start
LcbHLH23	RY-element	CATGCATG	cis-acting regulatory element involved in seed-specific regulation
LcbHLH23	MYB-like sequence	TAACCA	Unknown
LcbHLH23	DRE core	GCCGAC	Unknown
LcbHLH23	AT~TATA-box	TATATA	Unknown
LcbHLH23	Myc	TCTCTTA	Unknown
LcbHLH23	CAAT-box	CAAT	Unknown
LcbHLH23	WRE3	CCACCT	Unknown
LcbHLH23	Unnamed__2	CCCCGG	Unknown
LcbHLH24	Unnamed__6	taTAAATATct	Unknown
LcbHLH24	G-Box	CACGTT	cis-acting regulatory element involved in light responsiveness
LcbHLH24	ATCT-motif	AATCTAATCC	part of a conserved DNA module involved in light responsiveness
LcbHLH24	MYB-like sequence	TAACCA	Unknown
LcbHLH24	GC-motif	CCCCCG	enhancer-like element involved in anoxic specific inducibility
LcbHLH24	WUN-motif	CAATTACAT	Unknown
LcbHLH24	DRE core	GCCGAC	Unknown
LcbHLH24	GT1-motif	GGTTAA	light responsive element
LcbHLH24	ABRE	ACGTG	cis-acting element involved in the abscisic acid responsiveness
LcbHLH24	CAT-box	GCCACT	cis-acting regulatory element related to meristem expression
LcbHLH24	MBSI	aaaAaaC(G/C)GTTA	MYB binding site involved in flavonoid biosynthetic genes regulation
LcbHLH24	HD-Zip 1	CAAT(A/T)ATTG	element involved in differentiation of the palisade mesophyll cells
LcbHLH24	MYB	CAACCA	Unknown
LcbHLH24	Box 4	ATTAAT	part of a conserved DNA module involved in light responsiveness
LcbHLH24	ARE	AAACCA	cis-acting regulatory element essential for the anaerobic induction
LcbHLH24	Unnamed__4	CTCC	Unknown
LcbHLH24	ERE	ATTTTAAA	Unknown
LcbHLH24	circadian	CAAAGATATC	cis-acting regulatory element involved in circadian control
LcbHLH24	CAAT-box	CAAT	Unknown
LcbHLH24	Myc	TCTCTTA	Unknown
LcbHLH24	WRE3	CCACCT	Unknown
LcbHLH24	TC-rich repeats	ATTCTCTAAC	cis-acting element involved in defense and stress responsiveness
LcbHLH24	AT~TATA-box	TATATA	Unknown
LcbHLH24	RY-element	CATGCATG	cis-acting regulatory element involved in seed-specific regulation
LcbHLH24	TATA-box	taTATAAAtc	core promoter element around -30 of transcription start
LcbHLH24	AP-1	TGAGTTAG	Unknown
LcbHLH24	TCCC-motif	TCTCCCT	part of a light responsive element
LcbHLH24	GATA-motif	GATAGGA	part of a light responsive element
LcbHLH24	Unnamed__1	CGTGG	Unknown
LcbHLH25	GT1-motif	GGTTAAT	light responsive element
LcbHLH25	TC-rich repeats	GTTTTCTTAC	cis-acting element involved in defense and stress responsiveness
LcbHLH25	Unnamed__4	CTCC	Unknown
LcbHLH25	as-1	TGACG	Unknown
LcbHLH25	MBSI	aaaAaaC(G/C)GTTA	MYB binding site involved in flavonoid biosynthetic genes regulation
LcbHLH25	ERE	ATTTCATA	Unknown
LcbHLH25	STRE	AGGGG	Unknown
LcbHLH25	GATA-motif	AAGGATAAGG	part of a light responsive element
LcbHLH25	TGACG-motif	TGACG	cis-acting regulatory element involved in the MeJA-responsiveness
LcbHLH25	AAGAA-motif	GAAAGAA	Unknown
LcbHLH25	MYB	CAACAG	Unknown
LcbHLH25	TCT-motif	TCTTAC	part of a light responsive element
LcbHLH25	TATA	TATAAAAT	Unknown
LcbHLH25	CAT-box	GCCACT	cis-acting regulatory element related to meristem expression
LcbHLH25	CAAT-box	CAAT	Unknown
LcbHLH25	Unnamed__2	CCCCGG	Unknown
LcbHLH25	MYC	CAATTG	Unknown
LcbHLH25	TCA-element	CCATCTTTTT	cis-acting element involved in salicylic acid responsiveness
LcbHLH25	AT~TATA-box	TATATA	Unknown
LcbHLH25	Box 4	ATTAAT	part of a conserved DNA module involved in light responsiveness
LcbHLH25	Myb-binding site	CAACAG	Unknown
LcbHLH25	TATA-box	ATTATA	core promoter element around -30 of transcription start
LcbHLH25	GARE-motif	TCTGTTG	gibberellin-responsive element
LcbHLH25	CGTCA-motif	CGTCA	cis-acting regulatory element involved in the MeJA-responsiveness
LcbHLH25	ARE	AAACCA	cis-acting regulatory element essential for the anaerobic induction
LcbHLH26	G-box	CACGAC	cis-acting regulatory element involved in light responsiveness
LcbHLH26	ABRE3a	TACGTG	Unknown
LcbHLH26	ABRE	TACGGTC	cis-acting element involved in the abscisic acid responsiveness
LcbHLH26	L-box	ATCCCACCTAC	part of a light responsive element
LcbHLH26	AC-I	(T/C)C(T/C)(C/T)ACC(T/C)ACC	Unknown
LcbHLH26	MYB	CAACCA	Unknown
LcbHLH26	ATCT-motif	AATCTAATCC	part of a conserved DNA module involved in light responsiveness
LcbHLH26	MRE	AACCTAA	MYB binding site involved in light responsiveness
LcbHLH26	AAGAA-motif	gGTAAAGAAA	Unknown
LcbHLH26	TGACG-motif	TGACG	cis-acting regulatory element involved in the MeJA-responsiveness
LcbHLH26	ERE	ATTTCATA	Unknown
LcbHLH26	STRE	AGGGG	Unknown
LcbHLH26	GATA-motif	AAGGATAAGG	part of a light responsive element
LcbHLH26	CCAAT-box	CAACGG	MYBHv1 binding site
LcbHLH26	DRE	TACCGACAT	cis-acting element involved in dehydration, low-temp, salt stresses
LcbHLH26	as-1	TGACG	Unknown
LcbHLH26	TC-rich repeats	GTTTTCTTAC	cis-acting element involved in defense and stress responsiveness
LcbHLH26	GT1-motif	GGTTAAT	light responsive element
LcbHLH26	Unnamed__4	CTCC	Unknown
LcbHLH26	MYB recognition site	CCGTTG	Unknown
LcbHLH26	Unnamed__6	taTAAATATct	Unknown
LcbHLH26	AE-box	AGAAACAA	part of a module for light response
LcbHLH26	ARE	AAACCA	cis-acting regulatory element essential for the anaerobic induction
LcbHLH26	LTR	CCGAAA	cis-acting element involved in low-temperature responsiveness
LcbHLH26	Unnamed__1	CGTGG	Unknown
LcbHLH26	W box	TTGACC	Unknown
LcbHLH26	CGTCA-motif	CGTCA	cis-acting regulatory element involved in the MeJA-responsiveness
LcbHLH26	TATA-box	TATACA	core promoter element around -30 of transcription start
LcbHLH26	Box 4	ATTAAT	part of a conserved DNA module involved in light responsiveness
LcbHLH26	AT~TATA-box	TATATA	Unknown
LcbHLH26	ABRE4	CACGTA	Unknown
LcbHLH26	DRE core	GCCGAC	Unknown
LcbHLH26	TCA-element	CCATCTTTTT	cis-acting element involved in salicylic acid responsiveness
LcbHLH26	TCA	TCATCTTCAT	Unknown
LcbHLH26	Unnamed__2	AACCTAACCT	Unknown
LcbHLH26	MYC	CATTTG	Unknown
LcbHLH26	HD-Zip 3	GTAAT(G/C)ATTAC	protein binding site
LcbHLH26	CAAT-box	CCAAT	common cis-acting element in promoter and enhancer regions
LcbHLH26	MBS	CAACTG	MYB binding site involved in drought-inducibility
LcbHLH27	ABRE3a	TACGTG	Unknown
LcbHLH27	G-box	TACGTG	cis-acting regulatory element involved in light responsiveness
LcbHLH27	TCCC-motif	TCTCCCT	part of a light responsive element
LcbHLH27	ABRE	ACGTG	cis-acting element involved in the abscisic acid responsiveness
LcbHLH27	MYB	CAACCA	Unknown
LcbHLH27	TATA	TATAAAAT	Unknown
LcbHLH27	TCT-motif	TCTTAC	part of a light responsive element
LcbHLH27	AAGAA-motif	GAAAGAA	Unknown
LcbHLH27	TGACG-motif	TGACG	cis-acting regulatory element involved in the MeJA-responsiveness
LcbHLH27	MRE	AACCTAA	MYB binding site involved in light responsiveness
LcbHLH27	GATA-motif	AAGGATAAGG	part of a light responsive element
LcbHLH27	STRE	AGGGG	Unknown
LcbHLH27	ERE	ATTTCATA	Unknown
LcbHLH27	as-1	TGACG	Unknown
LcbHLH27	Unnamed__4	CTCC	Unknown
LcbHLH27	TC-rich repeats	GTTTTCTTAC	cis-acting element involved in defense and stress responsiveness
LcbHLH27	GT1-motif	GGTTAAT	light responsive element
LcbHLH27	AE-box	AGAAACAA	part of a module for light response
LcbHLH27	ARE	AAACCA	cis-acting regulatory element essential for the anaerobic induction
LcbHLH27	W box	TTGACC	Unknown
LcbHLH27	WUN-motif	AAATTACTA	Unknown
LcbHLH27	CGTCA-motif	CGTCA	cis-acting regulatory element involved in the MeJA-responsiveness
LcbHLH27	circadian	CAAAGATATC	cis-acting regulatory element involved in circadian control
LcbHLH27	Unnamed__1	GAATTTAATTAA	60K protein binding site
LcbHLH27	TATA-box	TATA	core promoter element around -30 of transcription start
LcbHLH27	I-box	cCATATCCAAT	part of a light responsive element
LcbHLH27	Box 4	ATTAAT	part of a conserved DNA module involved in light responsiveness
LcbHLH27	O2-site	GTTGACGTGA	cis-acting regulatory element involved in zein metabolism regulation
LcbHLH27	AT~TATA-box	TATATA	Unknown
LcbHLH27	ABRE4	CACGTA	Unknown
LcbHLH27	MYC	CATTTG	Unknown
LcbHLH27	Unnamed__2	AACCTAACCT	Unknown
LcbHLH27	CAAT-box	CCAAT	common cis-acting element in promoter and enhancer regions
LcbHLH27	MBS	CAACTG	MYB binding site involved in drought-inducibility
LcbHLH28	I-box	cCATATCCAAT	part of a light responsive element
LcbHLH28	TATA-box	TATA	core promoter element around -30 of transcription start
LcbHLH28	G-Box	CACGTG	cis-acting regulatory element involved in light responsiveness
LcbHLH28	Box 4	ATTAAT	part of a conserved DNA module involved in light responsiveness
LcbHLH28	AE-box	AGAAACAA	part of a module for light response
LcbHLH28	ARE	AAACCA	cis-acting regulatory element essential for the anaerobic induction
LcbHLH28	AT1-motif	AATTATTTTTTATT	part of a light responsive module
LcbHLH28	Unnamed__1	GAATTTAATTAA	60K protein binding site
LcbHLH28	circadian	CAAAGATATC	cis-acting regulatory element involved in circadian control
LcbHLH28	W box	TTGACC	Unknown
LcbHLH28	WUN-motif	AAATTACTA	Unknown
LcbHLH28	CGTCA-motif	CGTCA	cis-acting regulatory element involved in the MeJA-responsiveness
LcbHLH28	Unnamed__2	AACCTAACCT	Unknown
LcbHLH28	MYC	CATTTG	Unknown
LcbHLH28	Myb	CAACTG	Unknown
LcbHLH28	MBS	CAACTG	MYB binding site involved in drought-inducibility
LcbHLH28	CAAT-box	CCAAT	common cis-acting element in promoter and enhancer regions
LcbHLH28	ABRE4	CACGTA	Unknown
LcbHLH28	AT~TATA-box	TATATA	Unknown
LcbHLH28	O2-site	GTTGACGTGA	cis-acting regulatory element involved in zein metabolism regulation
LcbHLH28	TCT-motif	TCTTAC	part of a light responsive element
LcbHLH28	TATA	TATAAAAT	Unknown
LcbHLH28	MRE	AACCTAA	MYB binding site involved in light responsiveness
LcbHLH28	TGACG-motif	TGACG	cis-acting regulatory element involved in the MeJA-responsiveness
LcbHLH28	AAGAA-motif	GAAAGAA	Unknown
LcbHLH28	ABRE3a	TACGTG	Unknown
LcbHLH28	ABRE	ACGTG	cis-acting element involved in the abscisic acid responsiveness
LcbHLH28	TCCC-motif	TCTCCCT	part of a light responsive element
LcbHLH28	as-1	TGACG	Unknown
LcbHLH28	GT1-motif	GGTTAAT	light responsive element
LcbHLH28	TC-rich repeats	GTTTTCTTAC	cis-acting element involved in defense and stress responsiveness
LcbHLH28	Unnamed__4	CTCC	Unknown
LcbHLH28	STRE	AGGGG	Unknown
LcbHLH28	ERE	ATTTCATA	Unknown
LcbHLH28	GATA-motif	AAGGATAAGG	part of a light responsive element
LcbHLH29	MYB recognition site	CCGTTG	Unknown
LcbHLH29	Unnamed__4	CTCC	Unknown
LcbHLH29	Gap-box	CAAATGAA(A/G)A	part of a light responsive element
LcbHLH29	as-1	TGACG	Unknown
LcbHLH29	CCAAT-box	CAACGG	MYBHv1 binding site
LcbHLH29	STRE	AGGGG	Unknown
LcbHLH29	TGACG-motif	TGACG	cis-acting regulatory element involved in the MeJA-responsiveness
LcbHLH29	AAGAA-motif	GAAAGAA	Unknown
LcbHLH29	TATA	TATAAAAT	Unknown
LcbHLH29	MYB	CAACCA	Unknown
LcbHLH29	TATC-box	TATCCCA	cis-acting element involved in gibberellin-responsiveness
LcbHLH29	MBS	CAACTG	MYB binding site involved in drought-inducibility
LcbHLH29	CAAT-box	CAAT	Unknown
LcbHLH29	Myc	TCTCTTA	Unknown
LcbHLH29	WRE3	CCACCT	Unknown
LcbHLH29	MYB-like sequence	TAACCA	Unknown
LcbHLH29	AT~TATA-box	TATATA	Unknown
LcbHLH29	MSA-like	(T/C)C(T/C)AACGG(T/C)(T/C)A	cis-acting element involved in cell cycle regulation
LcbHLH29	Box 4	ATTAAT	part of a conserved DNA module involved in light responsiveness
LcbHLH29	TATA-box	TATATAA	core promoter element around -30 of transcription start
LcbHLH29	P-box	CCTTTTG	gibberellin-responsive element
LcbHLH29	circadian	CAAAGATATC	cis-acting regulatory element involved in circadian control
LcbHLH29	CGTCA-motif	CGTCA	cis-acting regulatory element involved in the MeJA-responsiveness
LcbHLH29	WUN-motif	AAATTTCCT	wound-responsive element
LcbHLH29	Box II -like sequence	TCCGTGTACCA	cis-acting regulatory element
LcbHLH29	GC-motif	CCCCCG	enhancer-like element involved in anoxic specific inducibility
LcbHLH29	ARE	AAACCA	cis-acting regulatory element essential for the anaerobic induction
LcbHLH30	MYB	CAACCA	Unknown
LcbHLH30	TATA	TATAAAAT	Unknown
LcbHLH30	CAT-box	GCCACT	cis-acting regulatory element related to meristem expression
LcbHLH30	AAGAA-motif	GAAAGAA	Unknown
LcbHLH30	G-box	CACGTG	cis-acting regulatory element involved in light responsiveness
LcbHLH30	ABRE	CACGTG	cis-acting element involved in the abscisic acid responsiveness
LcbHLH30	TATC-box	TATCCCA	cis-acting element involved in gibberellin-responsiveness
LcbHLH30	Gap-box	CAAATGAA(A/G)A	part of a light responsive element
LcbHLH30	GCN4_motif	TGAGTCA	cis-regulatory element involved in endosperm expression
LcbHLH30	GT1-motif	GGTTAA	light responsive element
LcbHLH30	Unnamed__4	CTCC	Unknown
LcbHLH30	MYB recognition site	CCGTTG	Unknown
LcbHLH30	STRE	AGGGG	Unknown
LcbHLH30	CCAAT-box	CAACGG	MYBHv1 binding site
LcbHLH30	P-box	CCTTTTG	gibberellin-responsive element
LcbHLH30	TATA-box	TATATAA	core promoter element around -30 of transcription start
LcbHLH30	Box 4	ATTAAT	part of a conserved DNA module involved in light responsiveness
LcbHLH30	MSA-like	(T/C)C(T/C)AACGG(T/C)(T/C)A	cis-acting element involved in cell cycle regulation
LcbHLH30	GC-motif	CCCCCG	enhancer-like element involved in anoxic specific inducibility
LcbHLH30	WUN-motif	AAATTTCCT	wound-responsive element
LcbHLH30	circadian	CAAAGATATC	cis-acting regulatory element involved in circadian control
LcbHLH30	Unnamed__2	CCCCGG	Unknown
LcbHLH30	WRE3	CCACCT	Unknown
LcbHLH30	MYC	CATTTG	Unknown
LcbHLH30	CAAT-box	CAAT	Unknown
LcbHLH30	AT~TATA-box	TATATA	Unknown
LcbHLH30	MYB-like sequence	TAACCA	Unknown
LcbHLH31	AT~TATA-box	TATATA	Unknown
LcbHLH31	OCT	CGCGGATC	Unknown
LcbHLH31	MYB-like sequence	TAACCA	Unknown
LcbHLH31	TCA-element	CCATCTTTTT	cis-acting element involved in salicylic acid responsiveness
LcbHLH31	TCA	TCATCTTCAT	Unknown
LcbHLH31	MYC	CAATTG	Unknown
LcbHLH31	MBS	CAACTG	MYB binding site involved in drought-inducibility
LcbHLH31	Myb	CAACTG	Unknown
LcbHLH31	CAAT-box	CAAAT	common cis-acting element in promoter and enhancer regions
LcbHLH31	GC-motif	CCCCCG	enhancer-like element involved in anoxic specific inducibility
LcbHLH31	LTR	CCGAAA	cis-acting element involved in low-temperature responsiveness
LcbHLH31	Unnamed__1	CGTGG	Unknown
LcbHLH31	NON-box	AGATCGACG	cis-acting regulatory element related to meristem specific activation
LcbHLH31	CGTCA-motif	CGTCA	cis-acting regulatory element involved in the MeJA-responsiveness
LcbHLH31	W box	TTGACC	Unknown
LcbHLH31	TATA-box	ATTATA	core promoter element around -30 of transcription start
LcbHLH31	Box 4	ATTAAT	part of a conserved DNA module involved in light responsiveness
LcbHLH31	G-Box	CACGTT	cis-acting regulatory element involved in light responsiveness
LcbHLH31	Myb-binding site	CAACAG	Unknown
LcbHLH31	STRE	AGGGG	Unknown
LcbHLH31	GATA-motif	GATAGGA	part of a light responsive element
LcbHLH31	as-1	TGACG	Unknown
LcbHLH31	GT1-motif	GGTTAA	light responsive element
LcbHLH31	TC-rich repeats	ATTCTCTAAC	cis-acting element involved in defense and stress responsiveness
LcbHLH31	Unnamed__4	CTCC	Unknown
LcbHLH31	dOCT	CACGGATC	Unknown
LcbHLH31	ABRE	ACGTG	cis-acting element involved in the abscisic acid responsiveness
LcbHLH31	TCT-motif	TCTTAC	part of a light responsive element
LcbHLH31	TATA	TATAAAAT	Unknown
LcbHLH31	TGACG-motif	TGACG	cis-acting regulatory element involved in the MeJA-responsiveness
LcbHLH31	AAGAA-motif	GAAAGAA	Unknown
LcbHLH32	Unnamed__1	CGTGG	Unknown
LcbHLH32	circadian	CAAAGATATC	cis-acting regulatory element involved in circadian control
LcbHLH32	WUN-motif	CAATTACAT	Unknown
LcbHLH32	CGTCA-motif	CGTCA	cis-acting regulatory element involved in the MeJA-responsiveness
LcbHLH32	ARE	AAACCA	cis-acting regulatory element essential for the anaerobic induction
LcbHLH32	GC-motif	CCCCCG	enhancer-like element involved in anoxic specific inducibility
LcbHLH32	G-Box	CACGTT	cis-acting regulatory element involved in light responsiveness
LcbHLH32	Box 4	ATTAAT	part of a conserved DNA module involved in light responsiveness
LcbHLH32	Myb-binding site	CAACAG	Unknown
LcbHLH32	P-box	CCTTTTG	gibberellin-responsive element
LcbHLH32	TATA-box	TATA	core promoter element around -30 of transcription start
LcbHLH32	DRE core	GCCGAC	Unknown
LcbHLH32	AT~TATA-box	TATATA	Unknown
LcbHLH32	O2-site	GATGA(C/T)(A/G)TG(A/G)	cis-acting regulatory element involved in zein metabolism regulation
LcbHLH32	MYB-like sequence	TAACCA	Unknown
LcbHLH32	Myb	TAACTG	Unknown
LcbHLH32	ATC-motif	AGCTATCCA	part of a conserved DNA module involved in light responsiveness
LcbHLH32	CAAT-box	CAAT	Unknown
LcbHLH32	WRE3	CCACCT	Unknown
LcbHLH32	MYC	CATGTG	Unknown
LcbHLH32	ABRE	ACGTG	cis-acting element involved in the abscisic acid responsiveness
LcbHLH32	TCCC-motif	TCTCCCT	part of a light responsive element
LcbHLH32	AT-rich element	ATAGAAATCAA	binding site of AT-rich DNA binding protein (ATBP-1)
LcbHLH32	Sp1	GGGCGG	light responsive element
LcbHLH32	MRE	AACCTAA	MYB binding site involved in light responsiveness
LcbHLH32	TGACG-motif	TGACG	cis-acting regulatory element involved in the MeJA-responsiveness
LcbHLH32	TCT-motif	TCTTAC	part of a light responsive element
LcbHLH32	TATA	TATAAAAT	Unknown
LcbHLH32	CAT-box	GCCACT	cis-acting regulatory element related to meristem expression
LcbHLH32	CCAAT-box	CAACGG	MYBHv1 binding site
LcbHLH32	STRE	AGGGG	Unknown
LcbHLH32	GATA-motif	GATAGGA	part of a light responsive element
LcbHLH32	MYB recognition site	CCGTTG	Unknown
LcbHLH32	Unnamed__4	CTCC	Unknown
LcbHLH32	as-1	TGACG	Unknown
LcbHLH33	chs-CMA2a	TCACTTGA	part of a light responsive element
LcbHLH33	ABRE	ACGTG	cis-acting element involved in the abscisic acid responsiveness
LcbHLH33	GCN4_motif	TGAGTCA	cis-regulatory element involved in endosperm expression
LcbHLH33	WUN-motif	AAATTACT	Unknown
LcbHLH33	MRE	AACCTAA	MYB binding site involved in light responsiveness
LcbHLH33	Myb-binding site	CAACAG	Unknown
LcbHLH33	STRE	AGGGG	Unknown
LcbHLH33	Unnamed__4	CTCC	Unknown
LcbHLH33	ERE	ATTTTAAA	Unknown
LcbHLH33	ARE	AAACCA	cis-acting regulatory element essential for the anaerobic induction
LcbHLH33	MBS	CAACTG	MYB binding site involved in drought-inducibility
LcbHLH33	AAGAA-motif	gGTAAAGAAA	Unknown
LcbHLH33	Box 4	ATTAAT	part of a conserved DNA module involved in light responsiveness
LcbHLH33	plant_AP-2-like	CGACCAGG	Unknown
LcbHLH33	MYB	CAACAG	Unknown
LcbHLH33	ABRE4	CACGTA	Unknown
LcbHLH33	3-AF1 binding site	TAAGAGAGGAA	light responsive element
LcbHLH33	G-box	TACGTG	cis-acting regulatory element involved in light responsiveness
LcbHLH33	AuxRR-core	GGTCCAT	cis-acting regulatory element involved in auxin responsiveness
LcbHLH33	AT~TATA-box	TATATA	Unknown
LcbHLH33	TCA-element	CCATCTTTTT	cis-acting element involved in salicylic acid responsiveness
LcbHLH33	CAAT-box	CAAT	Unknown
LcbHLH33	Myc	TCTCTTA	Unknown
LcbHLH33	A-box	CCGTCC	cis-acting regulatory element
LcbHLH33	ABRE3a	TACGTG	Unknown
LcbHLH33	CCGTCC motif	CCGTCC	Unknown
LcbHLH33	CCGTCC-box	CCGTCC	Unknown
LcbHLH33	TATA-box	ATATAA	core promoter element around -30 of transcription start
LcbHLH34	TATA-box	TATA	core promoter element around -30 of transcription start
LcbHLH34	Myb-binding site	CAACAG	Unknown
LcbHLH34	Box 4	ATTAAT	part of a conserved DNA module involved in light responsiveness
LcbHLH34	AuxRR-core	GGTCCAT	cis-acting regulatory element involved in auxin responsiveness
LcbHLH34	WUN-motif	AAATTACT	Unknown
LcbHLH34	3-AF1 binding site	TAAGAGAGGAA	light responsive element
LcbHLH34	MYC	CATTTG	Unknown
LcbHLH34	CAAT-box	CAAT	Unknown
LcbHLH34	Myb	CAACTG	Unknown
LcbHLH34	MBS	CAACTG	MYB binding site involved in drought-inducibility
LcbHLH34	A-box	CCGTCC	cis-acting regulatory element
LcbHLH34	AT~TATA-box	TATATA	Unknown
LcbHLH34	ABRE4	CACGTA	Unknown
LcbHLH34	CCGTCC-box	CCGTCC	Unknown
LcbHLH34	TCA-element	CCATCTTTTT	cis-acting element involved in salicylic acid responsiveness
LcbHLH34	CAT-box	GCCACT	cis-acting regulatory element related to meristem expression
LcbHLH34	MRE	AACCTAA	MYB binding site involved in light responsiveness
LcbHLH34	AAGAA-motif	gGTAAAGAAA	Unknown
LcbHLH34	G-box	TACGTG	cis-acting regulatory element involved in light responsiveness
LcbHLH34	ABRE3a	TACGTG	Unknown
LcbHLH34	CCGTCC motif	CCGTCC	Unknown
LcbHLH34	ABRE	ACGTG	cis-acting element involved in the abscisic acid responsiveness
LcbHLH34	plant_AP-2-like	CGACCAGG	Unknown
LcbHLH34	GCN4_motif	TGAGTCA	cis-regulatory element involved in endosperm expression
LcbHLH34	Unnamed__4	CTCC	Unknown
LcbHLH34	ERE	ATTTTAAA	Unknown
LcbHLH34	STRE	AGGGG	Unknown
LcbHLH34	chs-CMA2a	TCACTTGA	part of a light responsive element
LcbHLH35	chs-CMA1a	TTACTTAA	part of a light responsive element
LcbHLH35	as-1	TGACG	Unknown
LcbHLH35	HD-Zip 3	GTAAT(G/C)ATTAC	protein binding site
LcbHLH35	MBS	CAACTG	MYB binding site involved in drought-inducibility
LcbHLH35	Unnamed__8	TCCACGTAGA	Unknown
LcbHLH35	ARE	AAACCA	cis-acting regulatory element essential for the anaerobic induction
LcbHLH35	ERE	ATTTTAAA	Unknown
LcbHLH35	Unnamed__4	CTCC	Unknown
LcbHLH35	MYB	CAACAG	Unknown
LcbHLH35	AAGAA-motif	GAAAGAA	Unknown
LcbHLH35	Box 4	ATTAAT	part of a conserved DNA module involved in light responsiveness
LcbHLH35	TATA	TATAAAAT	Unknown
LcbHLH35	Unnamed__14	TCCACGTAGA	Unknown
LcbHLH35	CAT-box	GCCACT	cis-acting regulatory element related to meristem expression
LcbHLH35	MBSI	aaaAaaC(G/C)GTTA	MYB binding site involved in flavonoid biosynthetic genes regulation
LcbHLH35	Unnamed__12	TCCACGTAGA	Unknown
LcbHLH35	DRE core	GCCGAC	Unknown
LcbHLH35	CGTCA-motif	CGTCA	cis-acting regulatory element involved in the MeJA-responsiveness
LcbHLH35	Unnamed__6	taTAAATATct	Unknown
LcbHLH35	Myb-binding site	CAACAG	Unknown
LcbHLH35	O2-site	GATGACATGG	cis-acting regulatory element involved in zein metabolism regulation
LcbHLH35	TGACG-motif	TGACG	cis-acting regulatory element involved in the MeJA-responsiveness
LcbHLH35	I-box	GTATAAGGCC	part of a light responsive element
LcbHLH35	MSA-like	TCAAACGGT	cis-acting element involved in cell cycle regulation
LcbHLH35	F-box	CTATTCTCATT	Unknown
LcbHLH35	GA-motif	ATAGATAA	part of a light responsive element
LcbHLH35	TATA-box	taTATAAAtc	core promoter element around -30 of transcription start
LcbHLH35	Unnamed__10	TCCACGTAGA	Unknown
LcbHLH35	MYC	CAATTG	Unknown
LcbHLH35	LAMP-element	CTTTATCA	part of a light responsive element
LcbHLH35	AT~TATA-box	TATATA	Unknown
LcbHLH35	LTR	CCGAAA	cis-acting element involved in low-temperature responsiveness
LcbHLH35	TCA	TCATCTTCAT	Unknown
LcbHLH35	CAAT-box	CAAAT	common cis-acting element in promoter and enhancer regions
LcbHLH36	GT1-motif	GGTTAA	light responsive element
LcbHLH36	TGA-element	AACGAC	auxin-responsive element
LcbHLH36	MYB-like sequence	TAACCA	Unknown
LcbHLH36	CGTCA-motif	CGTCA	cis-acting regulatory element involved in the MeJA-responsiveness
LcbHLH36	G-Box	CACGTT	cis-acting regulatory element involved in light responsiveness
LcbHLH36	Myb-binding site	CAACAG	Unknown
LcbHLH36	O2-site	GATGATGTGG	cis-acting regulatory element involved in zein metabolism regulation
LcbHLH36	Gap-box	CAAATGAA(A/G)A	part of a light responsive element
LcbHLH36	as-1	TGACG	Unknown
LcbHLH36	Unnamed__4	CTCC	Unknown
LcbHLH36	TATA	TATAAAAT	Unknown
LcbHLH36	Sp1	GGGCGG	light responsive element
LcbHLH36	TCT-motif	TCTTAC	part of a light responsive element
LcbHLH36	CTAG-motif	ACTAGCAGAA	Unknown
LcbHLH36	CAAT-box	CAAT	Unknown
LcbHLH36	A-box	CCGTCC	cis-acting regulatory element
LcbHLH36	Unnamed__1	CGTGG	Unknown
LcbHLH36	MSA-like	(T/C)C(T/C)AACGG(T/C)(T/C)A	cis-acting element involved in cell cycle regulation
LcbHLH36	GA-motif	ATAGATAA	part of a light responsive element
LcbHLH36	CCGTCC-box	CCGTCC	Unknown
LcbHLH36	ABRE	ACGTG	cis-acting element involved in the abscisic acid responsiveness
LcbHLH36	GC-motif	CCCCCG	enhancer-like element involved in anoxic specific inducibility
LcbHLH36	Unnamed__6	taTAAATATct	Unknown
LcbHLH36	TGACG-motif	TGACG	cis-acting regulatory element involved in the MeJA-responsiveness
LcbHLH36	STRE	AGGGG	Unknown
LcbHLH36	MBS	CAACTG	MYB binding site involved in drought-inducibility
LcbHLH36	ARE	AAACCA	cis-acting regulatory element essential for the anaerobic induction
LcbHLH36	ERE	ATTTTAAA	Unknown
LcbHLH36	MYB	TAACCA	Unknown
LcbHLH36	AAGAA-motif	GAAAGAA	Unknown
LcbHLH36	Box 4	ATTAAT	part of a conserved DNA module involved in light responsiveness
LcbHLH36	MYC	CATTTG	Unknown
LcbHLH36	DRE1	ACCGAGA	Unknown
LcbHLH36	AT~TATA-box	TATATA	Unknown
LcbHLH36	AuxRR-core	GGTCCAT	cis-acting regulatory element involved in auxin responsiveness
LcbHLH36	Unnamed__2	CCCCGG	Unknown
LcbHLH36	TCA-element	CCATCTTTTT	cis-acting element involved in salicylic acid responsiveness
LcbHLH36	GATA-motif	GATAGGG	part of a light responsive element
LcbHLH36	I-box	gGATAAGGTG	part of a light responsive element
LcbHLH36	CCGTCC motif	CCGTCC	Unknown
LcbHLH36	AT-rich sequence	TAAAATACT	element for maximal elicitor-mediated activation (2copies)
LcbHLH36	TATA-box	ATATAA	core promoter element around -30 of transcription start
LcbHLH37	Unnamed__2	AACCTAACCT	Unknown
LcbHLH37	WRE3	CCACCT	Unknown
LcbHLH37	Myc	TCTCTTA	Unknown
LcbHLH37	TCA	TCATCTTCAT	Unknown
LcbHLH37	TCA-element	CCATCTTTTT	cis-acting element involved in salicylic acid responsiveness
LcbHLH37	CAAT-box	CAAT	Unknown
LcbHLH37	AT~ABRE	TACGTGTC	Unknown
LcbHLH37	ABRE2	CCACGTGG	Unknown
LcbHLH37	AT~TATA-box	TATATA	Unknown
LcbHLH37	TATA-box	TATA	core promoter element around -30 of transcription start
LcbHLH37	Unnamed__1	CGTGG	Unknown
LcbHLH37	ABRE3a	TACGTG	Unknown
LcbHLH37	Box II	CCACGTGGC	part of a light responsive element
LcbHLH37	TCCC-motif	TCTCCCT	part of a light responsive element
LcbHLH37	MYB recognition site	CCGTTG	Unknown
LcbHLH37	re2f-1	GCGGGAAA	Unknown
LcbHLH37	TGACG-motif	TGACG	cis-acting regulatory element involved in the MeJA-responsiveness
LcbHLH37	G-Box	TCCACATGGCA	cis-acting regulatory element involved in light responsiveness
LcbHLH37	Unnamed__6	taTAAATATct	Unknown
LcbHLH37	CAT-box	GCCACT	cis-acting regulatory element related to meristem expression
LcbHLH37	GT1-motif	GGTTAA	light responsive element
LcbHLH37	ABRE	GCAACGTGTC	cis-acting element involved in the abscisic acid responsiveness
LcbHLH37	CGTCA-motif	CGTCA	cis-acting regulatory element involved in the MeJA-responsiveness
LcbHLH37	CCAAT-box	CAACGG	MYBHv1 binding site
LcbHLH37	TGA-element	AACGAC	auxin-responsive element
LcbHLH37	WUN-motif	AAATTACTA	Unknown
LcbHLH37	AAGAA-motif	GAAAGAA	Unknown
LcbHLH37	TATA	TATAAAAT	Unknown
LcbHLH37	Box 4	ATTAAT	part of a conserved DNA module involved in light responsiveness
LcbHLH37	ABRE4	CACGTA	Unknown
LcbHLH37	MYB	CAACCA	Unknown
LcbHLH37	as-1	TGACG	Unknown
LcbHLH37	STRE	AGGGG	Unknown
LcbHLH37	Unnamed__4	CTCC	Unknown
LcbHLH37	ERE	ATTTTAAA	Unknown
LcbHLH38	ABRE3a	TACGTG	Unknown
LcbHLH38	Unnamed__1	CGTGG	Unknown
LcbHLH38	Box II	CCACGTGGC	part of a light responsive element
LcbHLH38	TCCC-motif	TCTCCCT	part of a light responsive element
LcbHLH38	TATA-box	TACAAAA	core promoter element around -30 of transcription start
LcbHLH38	ABRE2	CCACGTGG	Unknown
LcbHLH38	AT~ABRE	TACGTGTC	Unknown
LcbHLH38	AT~TATA-box	TATATA	Unknown
LcbHLH38	WRE3	CCACCT	Unknown
LcbHLH38	TC-rich repeats	ATTCTCTAAC	cis-acting element involved in defense and stress responsiveness
LcbHLH38	LTR	CCGAAA	cis-acting element involved in low-temperature responsiveness
LcbHLH38	Myc	TCTCTTA	Unknown
LcbHLH38	TCA	TCATCTTCAT	Unknown
LcbHLH38	TCA-element	CCATCTTTTT	cis-acting element involved in salicylic acid responsiveness
LcbHLH38	CAAT-box	CAAT	Unknown
LcbHLH38	STRE	AGGGG	Unknown
LcbHLH38	as-1	TGACG	Unknown
LcbHLH38	ERE	ATTTTAAA	Unknown
LcbHLH38	Unnamed__4	CTCC	Unknown
LcbHLH38	ABRE4	CACGTA	Unknown
LcbHLH38	MYB	CAACCA	Unknown
LcbHLH38	Box 4	ATTAAT	part of a conserved DNA module involved in light responsiveness
LcbHLH38	AAGAA-motif	gGTAAAGAAA	Unknown
LcbHLH38	TATA	TATAAAAT	Unknown
LcbHLH38	G-box	tgACACGTGGCA	cis-acting regulatory element involved in light responsiveness
LcbHLH38	CAT-box	GCCACT	cis-acting regulatory element related to meristem expression
LcbHLH38	GT1-motif	GGTTAA	light responsive element
LcbHLH38	ABRE	GCAACGTGTC	cis-acting element involved in the abscisic acid responsiveness
LcbHLH38	WUN-motif	AAATTACTA	Unknown
LcbHLH38	TGA-element	AACGAC	auxin-responsive element
LcbHLH38	CGTCA-motif	CGTCA	cis-acting regulatory element involved in the MeJA-responsiveness
LcbHLH38	CCAAT-box	CAACGG	MYBHv1 binding site
LcbHLH38	re2f-1	GCGGGAAA	Unknown
LcbHLH38	MYB recognition site	CCGTTG	Unknown
LcbHLH38	Unnamed__6	taTAAATATct	Unknown
LcbHLH38	TGACG-motif	TGACG	cis-acting regulatory element involved in the MeJA-responsiveness
LcbHLH39	AT~TATA-box	TATATA	Unknown
LcbHLH39	ABRE2	CCACGTGG	Unknown
LcbHLH39	MYC	CAATTG	Unknown
LcbHLH39	RY-element	CATGCATG	cis-acting regulatory element involved in seed-specific regulation
LcbHLH39	TCA	TCATCTTCAT	Unknown
LcbHLH39	TCA-element	CCATCTTTTT	cis-acting element involved in salicylic acid responsiveness
LcbHLH39	CAAT-box	CAAT	Unknown
LcbHLH39	AE-box	AGAAACAA	part of a module for light response
LcbHLH39	CCGTCC motif	CCGTCC	Unknown
LcbHLH39	Box II	CCACGTGGC	part of a light responsive element
LcbHLH39	ABRE3a	TACGTG	Unknown
LcbHLH39	GATA-motif	GATAGGA	part of a light responsive element
LcbHLH39	MSA-like	TCCAACGGT	cis-acting element involved in cell cycle regulation
LcbHLH39	Unnamed__1	GCCACGTGGC	Unknown
LcbHLH39	A-box	CCGTCC	cis-acting regulatory element
LcbHLH39	Unnamed__10	TCCACGTAGA	Unknown
LcbHLH39	TATA-box	TATAAA	core promoter element around -30 of transcription start
LcbHLH39	CCGTCC-box	CCGTCC	Unknown
LcbHLH39	Myb	TAACTG	Unknown
LcbHLH39	TGA-element	AACGAC	auxin-responsive element
LcbHLH39	CCAAT-box	CAACGG	MYBHv1 binding site
LcbHLH39	CGTCA-motif	CGTCA	cis-acting regulatory element involved in the MeJA-responsiveness
LcbHLH39	ABRE	CGTACGTGCA	cis-acting element involved in the abscisic acid responsiveness
LcbHLH39	GT1-motif	GGTTAAT	light responsive element
LcbHLH39	Unnamed__12	TCCACGTAGA	Unknown
LcbHLH39	TATC-box	TATCCCA	cis-acting element involved in gibberellin-responsiveness
LcbHLH39	G-Box	CACGTG	cis-acting regulatory element involved in light responsiveness
LcbHLH39	TGACG-motif	TGACG	cis-acting regulatory element involved in the MeJA-responsiveness
LcbHLH39	Myb-binding site	CAACAG	Unknown
LcbHLH39	MRE	AACCTAA	MYB binding site involved in light responsiveness
LcbHLH39	MYB recognition site	CCGTTG	Unknown
LcbHLH39	ARE	AAACCA	cis-acting regulatory element essential for the anaerobic induction
LcbHLH39	Unnamed__8	TCCACGTAGA	Unknown
LcbHLH39	MBS	CAACTG	MYB binding site involved in drought-inducibility
LcbHLH39	Unnamed__4	CTCC	Unknown
LcbHLH39	as-1	TGACG	Unknown
LcbHLH39	ABRE4	CACGTA	Unknown
LcbHLH39	Unnamed__14	TCCACGTAGA	Unknown
LcbHLH40	STRE	AGGGG	Unknown
LcbHLH40	ARE	AAACCA	cis-acting regulatory element essential for the anaerobic induction
LcbHLH40	Unnamed__4	CTCC	Unknown
LcbHLH40	ERE	ATTTTAAA	Unknown
LcbHLH40	Box 4	ATTAAT	part of a conserved DNA module involved in light responsiveness
LcbHLH40	AAGAA-motif	GAAAGAA	Unknown
LcbHLH40	G-box	CACGAC	cis-acting regulatory element involved in light responsiveness
LcbHLH40	TCT-motif	TCTTAC	part of a light responsive element
LcbHLH40	ABRE	ACGTG	cis-acting element involved in the abscisic acid responsiveness
LcbHLH40	CAT-box	GCCACT	cis-acting regulatory element related to meristem expression
LcbHLH40	WUN-motif	TTATTACAT	Unknown
LcbHLH40	TATC-box	TATCCCA	cis-acting element involved in gibberellin-responsiveness
LcbHLH40	Unnamed__1	CGTGG	Unknown
LcbHLH40	5UTR Py-rich stretch	TTTCTCTCCTCTTTTTCCTC	cis-acting element conferring high transcription levels
LcbHLH40	TCCC-motif	TCTCCCT	part of a light responsive element
LcbHLH40	GA-motif	ATAGATAA	part of a light responsive element
LcbHLH40	TATA-box	ATATAA	core promoter element around -30 of transcription start
LcbHLH40	MYC	CATTTG	Unknown
LcbHLH40	W box	TTGACC	Unknown
LcbHLH40	AT~TATA-box	TATATA	Unknown
LcbHLH40	TC-rich repeats	GTTTTCTTAC	cis-acting element involved in defense and stress responsiveness
LcbHLH40	TCA	TCATCTTCAT	Unknown
LcbHLH40	CAAT-box	CAAAT	common cis-acting element in promoter and enhancer regions
LcbHLH40	AE-box	AGAAACTT	part of a module for light response
LcbHLH41	MYB recognition site	CCGTTG	Unknown
LcbHLH41	TATC-box	TATCCCA	cis-acting element involved in gibberellin-responsiveness
LcbHLH41	TGACG-motif	TGACG	cis-acting regulatory element involved in the MeJA-responsiveness
LcbHLH41	Myb-binding site	CAACAG	Unknown
LcbHLH41	GT1-motif	GGTTAA	light responsive element
LcbHLH41	AC-I	(T/C)C(T/C)(C/T)ACC(T/C)ACC	Unknown
LcbHLH41	MYB-like sequence	TAACCA	Unknown
LcbHLH41	DRE core	GCCGAC	Unknown
LcbHLH41	Box II -like sequence	TCCGTGTACCA	cis-acting regulatory element
LcbHLH41	CCAAT-box	CAACGG	MYBHv1 binding site
LcbHLH41	CGTCA-motif	CGTCA	cis-acting regulatory element involved in the MeJA-responsiveness
LcbHLH41	MYB	CAACAG	Unknown
LcbHLH41	AAGAA-motif	gGTAAAGAAA	Unknown
LcbHLH41	G-box	CACGAC	cis-acting regulatory element involved in light responsiveness
LcbHLH41	TCT-motif	TCTTAC	part of a light responsive element
LcbHLH41	STRE	AGGGG	Unknown
LcbHLH41	AT-rich element	ATAGAAATCAA	binding site of AT-rich DNA binding protein (ATBP-1)
LcbHLH41	as-1	TGACG	Unknown
LcbHLH41	circadian	CAAAGATATC	cis-acting regulatory element involved in circadian control
LcbHLH41	ERE	ATTTTAAA	Unknown
LcbHLH41	Unnamed__4	CTCC	Unknown
LcbHLH41	WRE3	CCACCT	Unknown
LcbHLH41	TC-rich repeats	ATTCTCTAAC	cis-acting element involved in defense and stress responsiveness
LcbHLH41	CAAT-box	CAAT	Unknown
LcbHLH41	AT1-motif	AATTATTTTTTATT	part of a light responsive module
LcbHLH41	W box	TTGACC	Unknown
LcbHLH41	AT~TATA-box	TATATA	Unknown
LcbHLH41	AP-1	TGAGTTAG	Unknown
LcbHLH41	CCGTCC-box	CCGTCC	Unknown
LcbHLH41	box S	AGCCACC	Unknown
LcbHLH41	TATA-box	TACAAAA	core promoter element around -30 of transcription start
LcbHLH41	GATA-motif	GATAGGG	part of a light responsive element
LcbHLH41	MSA-like	TCCAACGGT	cis-acting element involved in cell cycle regulation
LcbHLH41	Unnamed__1	CGTGG	Unknown
LcbHLH41	A-box	CCGTCC	cis-acting regulatory element
LcbHLH41	CCGTCC motif	CCGTCC	Unknown
LcbHLH41	TCCC-motif	TCTCCCT	part of a light responsive element
LcbHLH41	P-box	CCTTTTG	gibberellin-responsive element
LcbHLH42	W box	TTGACC	Unknown
LcbHLH42	AT~TATA-box	TATATA	Unknown
LcbHLH42	MYC	CATTTG	Unknown
LcbHLH42	CTAG-motif	ACTAGCAGAA	Unknown
LcbHLH42	CAAT-box	CCAAT	common cis-acting element in promoter and enhancer regions
LcbHLH42	TCA-element	CCATCTTTTT	cis-acting element involved in salicylic acid responsiveness
LcbHLH42	LTR	CCGAAA	cis-acting element involved in low-temperature responsiveness
LcbHLH42	P-box	CCTTTTG	gibberellin-responsive element
LcbHLH42	Unnamed__1	GAATTTAATTAA	60K protein binding site
LcbHLH42	TATA-box	ATTATA	core promoter element around -30 of transcription start
LcbHLH42	F-box	CTATTCTCATT	Unknown
LcbHLH42	CCAAT-box	CAACGG	MYBHv1 binding site
LcbHLH42	GT1-motif	GGTTAA	light responsive element
LcbHLH42	ABRE	GCAACGTGTC	cis-acting element involved in the abscisic acid responsiveness
LcbHLH42	Unnamed__6	taTAAATATct	Unknown
LcbHLH42	G-Box	CACGTG	cis-acting regulatory element involved in light responsiveness
LcbHLH42	MRE	AACCTAA	MYB binding site involved in light responsiveness
LcbHLH42	MYB recognition site	CCGTTG	Unknown
LcbHLH42	ARE	AAACCA	cis-acting regulatory element essential for the anaerobic induction
LcbHLH42	ERE	ATTTTAAA	Unknown
LcbHLH42	Unnamed__4	CTCC	Unknown
LcbHLH42	STRE	AGGGG	Unknown
LcbHLH42	circadian	CAAAGATATC	cis-acting regulatory element involved in circadian control
LcbHLH42	TCT-motif	TCTTAC	part of a light responsive element
LcbHLH42	Box 4	ATTAAT	part of a conserved DNA module involved in light responsiveness
LcbHLH43	Box II	CCACGTGGC	part of a light responsive element
LcbHLH43	Unnamed__1	GCCACGTGGC	Unknown
LcbHLH43	GA-motif	ATAGATAA	part of a light responsive element
LcbHLH43	Myc	TCTCTTA	Unknown
LcbHLH43	CAAT-box	CAAT	Unknown
LcbHLH43	TC-rich repeats	GTTTTCTTAC	cis-acting element involved in defense and stress responsiveness
LcbHLH43	Unnamed__4	CTCC	Unknown
LcbHLH43	circadian	CAAAGATATC	cis-acting regulatory element involved in circadian control
LcbHLH43	as-1	TGACG	Unknown
LcbHLH43	AT-rich element	ATAGAAATCAA	binding site of AT-rich DNA binding protein (ATBP-1)
LcbHLH43	TCT-motif	TCTTAC	part of a light responsive element
LcbHLH43	TATA	TATAAAAT	Unknown
LcbHLH43	CGTCA-motif	CGTCA	cis-acting regulatory element involved in the MeJA-responsiveness
LcbHLH43	MYB-like sequence	TAACCA	Unknown
LcbHLH43	GCN4_motif	TGAGTCA	cis-regulatory element involved in endosperm expression
LcbHLH43	GT1-motif	GGTTAAT	light responsive element
LcbHLH43	Myb-binding site	CAACAG	Unknown
LcbHLH43	G-Box	CACGTG	cis-acting regulatory element involved in light responsiveness
LcbHLH43	TCCC-motif	TCTCCCT	part of a light responsive element
LcbHLH43	I-box	GATAAGGGT	part of a light responsive element
LcbHLH43	TATA-box	TATAAAT	core promoter element around -30 of transcription start
LcbHLH43	LAMP-element	CCTTATCCA	part of a light responsive element
LcbHLH43	DRE1	ACCGAGA	Unknown
LcbHLH43	AT~TATA-box	TATATA	Unknown
LcbHLH43	GARE-motif	TCTGTTG	gibberellin-responsive element
LcbHLH43	RY-element	CATGCATG	cis-acting regulatory element involved in seed-specific regulation
LcbHLH43	ABRE2	CCACGTGG	Unknown
LcbHLH43	AE-box	AGAAACAA	part of a module for light response
LcbHLH43	TCA-element	CCATCTTTTT	cis-acting element involved in salicylic acid responsiveness
LcbHLH43	Unnamed__2	AACCTAACCT	Unknown
LcbHLH43	WRE3	CCACCT	Unknown
LcbHLH43	ERE	ATTTCATA	Unknown
LcbHLH43	ARE	AAACCA	cis-acting regulatory element essential for the anaerobic induction
LcbHLH43	chs-CMA1a	TTACTTAA	part of a light responsive element
LcbHLH43	STRE	AGGGG	Unknown
LcbHLH43	MYB	CAACCA	Unknown
LcbHLH43	DRE core	GCCGAC	Unknown
LcbHLH43	ABRE	CACGTG	cis-acting element involved in the abscisic acid responsiveness
LcbHLH43	TGACG-motif	TGACG	cis-acting regulatory element involved in the MeJA-responsiveness
LcbHLH43	Unnamed__6	taTAAATATct	Unknown
LcbHLH43	MRE	AACCTAA	MYB binding site involved in light responsiveness
LcbHLH44	CAAT-box	CAAT	Unknown
LcbHLH44	TC-rich repeats	GTTTTCTTAC	cis-acting element involved in defense and stress responsiveness
LcbHLH44	WRE3	CCACCT	Unknown
LcbHLH44	W box	TTGACC	Unknown
LcbHLH44	AuxRR-core	GGTCCAT	cis-acting regulatory element involved in auxin responsiveness
LcbHLH44	AT~TATA-box	TATATA	Unknown
LcbHLH44	MYC	CAATTG	Unknown
LcbHLH44	TATA-box	TATA	core promoter element around -30 of transcription start
LcbHLH44	Myb	CAACTG	Unknown
LcbHLH44	TCCC-motif	TCTCCCT	part of a light responsive element
LcbHLH44	AT-rich sequence	TAAAATACT	element for maximal elicitor-mediated activation (2copies)
LcbHLH44	GATA-motif	GATAGGA	part of a light responsive element
LcbHLH44	Unnamed__1	CGTGG	Unknown
LcbHLH44	Unnamed__6	taTAAATATct	Unknown
LcbHLH44	ATCT-motif	AATCTAATCC	part of a conserved DNA module involved in light responsiveness
LcbHLH44	MYB recognition site	CCGTTG	Unknown
LcbHLH44	TGA-element	AACGAC	auxin-responsive element
LcbHLH44	CCAAT-box	CAACGG	MYBHv1 binding site
LcbHLH44	CAT-box	GCCACT	cis-acting regulatory element related to meristem expression
LcbHLH44	chs-CMA2a	TCACTTGA	part of a light responsive element
LcbHLH44	Sp1	GGGCGG	light responsive element
LcbHLH44	TCT-motif	TCTTAC	part of a light responsive element
LcbHLH44	TATA	TATAAAAT	Unknown
LcbHLH44	AAGAA-motif	gGTAAAGAAA	Unknown
LcbHLH44	MBS	CAACTG	MYB binding site involved in drought-inducibility
LcbHLH44	ERE	ATTTTAAA	Unknown
LcbHLH44	Unnamed__4	CTCC	Unknown
LcbHLH44	ATC-motif	AGTAATCT	part of a conserved DNA module involved in light responsiveness
LcbHLH44	STRE	AGGGG	Unknown
LcbHLH44	JERE	AGACCGCC	Unknown
LcbHLH44	circadian	CAAAGATATC	cis-acting regulatory element involved in circadian control
LcbHLH45	AC-II	CCACCAACCCCC	Unknown
LcbHLH45	Myb	CAACTG	Unknown
LcbHLH45	CCGTCC-box	CCGTCC	Unknown
LcbHLH45	TATA-box	TATAA	core promoter element around -30 of transcription start
LcbHLH45	A-box	CCGTCC	cis-acting regulatory element
LcbHLH45	Unnamed__1	CGTGG	Unknown
LcbHLH45	I-box	cCATATCCAAT	part of a light responsive element
LcbHLH45	TCCC-motif	TCTCCCT	part of a light responsive element
LcbHLH45	CCGTCC motif	CCGTCC	Unknown
LcbHLH45	Unnamed__2	CCCCGG	Unknown
LcbHLH45	CAAT-box	CAAT	Unknown
LcbHLH45	AT1-motif	AATTATTTTTTATT	part of a light responsive module
LcbHLH45	MYC	CATTTG	Unknown
LcbHLH45	CTAG-motif	ACTAGCAGAA	Unknown
LcbHLH45	W box	TTGACC	Unknown
LcbHLH45	LAMP-element	CTTTATCA	part of a light responsive element
LcbHLH45	AT~TATA-box	TATATA	Unknown
LcbHLH45	Box 4	ATTAAT	part of a conserved DNA module involved in light responsiveness
LcbHLH45	TATA	TATAAAAT	Unknown
LcbHLH45	AAGAA-motif	GAAAGAA	Unknown
LcbHLH45	Sp1	GGGCGG	light responsive element
LcbHLH45	TCT-motif	TCTTAC	part of a light responsive element
LcbHLH45	G-box	CAGACGTGGCA	cis-acting regulatory element involved in light responsiveness
LcbHLH45	chs-CMA1a	TTACTTAA	part of a light responsive element
LcbHLH45	STRE	AGGGG	Unknown
LcbHLH45	MBS	CAACTG	MYB binding site involved in drought-inducibility
LcbHLH45	ARE	AAACCA	cis-acting regulatory element essential for the anaerobic induction
LcbHLH45	ERE	ATTTTAAA	Unknown
LcbHLH45	Unnamed__4	CTCC	Unknown
LcbHLH45	MYB recognition site	CCGTTG	Unknown
LcbHLH45	O2-site	GATGATGTGG	cis-acting regulatory element involved in zein metabolism regulation
LcbHLH45	ABRE	ACGTG	cis-acting element involved in the abscisic acid responsiveness
LcbHLH45	GT1-motif	GGTTAA	light responsive element
LcbHLH45	WUN-motif	AAATTACTA	Unknown
LcbHLH45	CCAAT-box	CAACGG	MYBHv1 binding site
LcbHLH46	O2-site	GATGATGTGG	cis-acting regulatory element involved in zein metabolism regulation
LcbHLH46	G-Box	TCCACATGGCA	cis-acting regulatory element involved in light responsiveness
LcbHLH46	MYB recognition site	CCGTTG	Unknown
LcbHLH46	CCAAT-box	CAACGG	MYBHv1 binding site
LcbHLH46	WUN-motif	AAATTACTA	Unknown
LcbHLH46	ABRE	ACGTG	cis-acting element involved in the abscisic acid responsiveness
LcbHLH46	GT1-motif	GGTTAA	light responsive element
LcbHLH46	Sp1	GGGCGG	light responsive element
LcbHLH46	TCT-motif	TCTTAC	part of a light responsive element
LcbHLH46	AAGAA-motif	GAAAGAA	Unknown
LcbHLH46	Box 4	ATTAAT	part of a conserved DNA module involved in light responsiveness
LcbHLH46	TATA	TATAAAAT	Unknown
LcbHLH46	MYB	CAACCA	Unknown
LcbHLH46	ERE	ATTTTAAA	Unknown
LcbHLH46	Unnamed__4	CTCC	Unknown
LcbHLH46	ARE	AAACCA	cis-acting regulatory element essential for the anaerobic induction
LcbHLH46	MBS	CAACTG	MYB binding site involved in drought-inducibility
LcbHLH46	STRE	AGGGG	Unknown
LcbHLH46	chs-CMA1a	TTACTTAA	part of a light responsive element
LcbHLH46	AT1-motif	AATTATTTTTTATT	part of a light responsive module
LcbHLH46	CAAT-box	CAAT	Unknown
LcbHLH46	Unnamed__2	CCCCGG	Unknown
LcbHLH46	TC-rich repeats	ATTCTCTAAC	cis-acting element involved in defense and stress responsiveness
LcbHLH46	AT~TATA-box	TATATA	Unknown
LcbHLH46	LAMP-element	CTTTATCA	part of a light responsive element
LcbHLH46	W box	TTGACC	Unknown
LcbHLH46	CTAG-motif	ACTAGCAGAA	Unknown
LcbHLH46	MYC	CATTTG	Unknown
LcbHLH46	TATA-box	TATATA	core promoter element around -30 of transcription start
LcbHLH46	CCGTCC-box	CCGTCC	Unknown
LcbHLH46	AC-II	CCACCAACCCCC	Unknown
LcbHLH46	TCCC-motif	TCTCCCT	part of a light responsive element
LcbHLH46	CCGTCC motif	CCGTCC	Unknown
LcbHLH46	I-box	GATAAGGGT	part of a light responsive element
LcbHLH46	Unnamed__1	CGTGG	Unknown
LcbHLH46	A-box	CCGTCC	cis-acting regulatory element
LcbHLH47	TATA-box	TATTTAAA	core promoter element around -30 of transcription start
LcbHLH47	Myb	TAACTG	Unknown
LcbHLH47	GA-motif	ATAGATAA	part of a light responsive element
LcbHLH47	I-box	cGATAAGGCG	part of a light responsive element
LcbHLH47	Unnamed__1	CGTGG	Unknown
LcbHLH47	MSA-like	TCCAACGGT	cis-acting element involved in cell cycle regulation
LcbHLH47	ABRE3a	TACGTG	Unknown
LcbHLH47	AE-box	AGAAACAA	part of a module for light response
LcbHLH47	TCA	TCATCTTCAT	Unknown
LcbHLH47	CAAT-box	CCAAT	common cis-acting element in promoter and enhancer regions
LcbHLH47	GTGGC-motif	CATCGTGTGGC	part of a light responsive element
LcbHLH47	AT~TATA-box	TATATA	Unknown
LcbHLH47	RY-element	CATGCATG	cis-acting regulatory element involved in seed-specific regulation
LcbHLH47	MYC	CATTTG	Unknown
LcbHLH47	G-box	TACGTG	cis-acting regulatory element involved in light responsiveness
LcbHLH47	Box 4	ATTAAT	part of a conserved DNA module involved in light responsiveness
LcbHLH47	AAGAA-motif	GAAAGAA	Unknown
LcbHLH47	TATA	TATAAAAT	Unknown
LcbHLH47	ABRE4	CACGTA	Unknown
LcbHLH47	ERE	ATTTTAAA	Unknown
LcbHLH47	Unnamed__4	CTCC	Unknown
LcbHLH47	MBS	CAACTG	MYB binding site involved in drought-inducibility
LcbHLH47	ARE	AAACCA	cis-acting regulatory element essential for the anaerobic induction
LcbHLH47	as-1	TGACG	Unknown
LcbHLH47	STRE	AGGGG	Unknown
LcbHLH47	Myb-binding site	CAACAG	Unknown
LcbHLH47	TGACG-motif	TGACG	cis-acting regulatory element involved in the MeJA-responsiveness
LcbHLH47	MYB recognition site	CCGTTG	Unknown
LcbHLH47	MRE	AACCTAA	MYB binding site involved in light responsiveness
LcbHLH47	CGTCA-motif	CGTCA	cis-acting regulatory element involved in the MeJA-responsiveness
LcbHLH47	CCAAT-box	CAACGG	MYBHv1 binding site
LcbHLH47	MYB-like sequence	TAACCA	Unknown
LcbHLH47	telo-box	AAACCCTAACCCTAA	Unknown
LcbHLH47	CAT-box	GCCACT	cis-acting regulatory element related to meristem expression
LcbHLH47	ABRE	ACGTG	cis-acting element involved in the abscisic acid responsiveness
LcbHLH48	F-box	CTATTCTCATT	Unknown
LcbHLH48	TATA-box	ATTATA	core promoter element around -30 of transcription start
LcbHLH48	Unnamed__1	GAATTTAATTAA	60K protein binding site
LcbHLH48	P-box	CCTTTTG	gibberellin-responsive element
LcbHLH48	LTR	CCGAAA	cis-acting element involved in low-temperature responsiveness
LcbHLH48	CAAT-box	CCAAT	common cis-acting element in promoter and enhancer regions
LcbHLH48	TCA-element	CCATCTTTTT	cis-acting element involved in salicylic acid responsiveness
LcbHLH48	MYC	CATTTG	Unknown
LcbHLH48	CTAG-motif	ACTAGCAGAA	Unknown
LcbHLH48	W box	TTGACC	Unknown
LcbHLH48	AT~TATA-box	TATATA	Unknown
LcbHLH48	Box 4	ATTAAT	part of a conserved DNA module involved in light responsiveness
LcbHLH48	TCT-motif	TCTTAC	part of a light responsive element
LcbHLH48	G-box	CACGTG	cis-acting regulatory element involved in light responsiveness
LcbHLH48	STRE	AGGGG	Unknown
LcbHLH48	circadian	CAAAGATATC	cis-acting regulatory element involved in circadian control
LcbHLH48	ARE	AAACCA	cis-acting regulatory element essential for the anaerobic induction
LcbHLH48	ERE	ATTTTAAA	Unknown
LcbHLH48	Unnamed__4	CTCC	Unknown
LcbHLH48	MYB recognition site	CCGTTG	Unknown
LcbHLH48	MRE	AACCTAA	MYB binding site involved in light responsiveness
LcbHLH48	Unnamed__6	taTAAATATct	Unknown
LcbHLH48	GT1-motif	GGTTAA	light responsive element
LcbHLH48	ABRE	GCAACGTGTC	cis-acting element involved in the abscisic acid responsiveness
LcbHLH48	CCAAT-box	CAACGG	MYBHv1 binding site
LcbHLH49	G-Box	CACGTG	cis-acting regulatory element involved in light responsiveness
LcbHLH49	Unnamed__6	taTAAATATct	Unknown
LcbHLH49	MYB recognition site	CCGTTG	Unknown
LcbHLH49	MRE	AACCTAA	MYB binding site involved in light responsiveness
LcbHLH49	CCAAT-box	CAACGG	MYBHv1 binding site
LcbHLH49	ABRE	GCAACGTGTC	cis-acting element involved in the abscisic acid responsiveness
LcbHLH49	GT1-motif	GGTTAA	light responsive element
LcbHLH49	TCT-motif	TCTTAC	part of a light responsive element
LcbHLH49	Box 4	ATTAAT	part of a conserved DNA module involved in light responsiveness
LcbHLH49	Unnamed__4	CTCC	Unknown
LcbHLH49	ERE	ATTTTAAA	Unknown
LcbHLH49	ARE	AAACCA	cis-acting regulatory element essential for the anaerobic induction
LcbHLH49	circadian	CAAAGATATC	cis-acting regulatory element involved in circadian control
LcbHLH49	STRE	AGGGG	Unknown
LcbHLH49	CAAT-box	CCAAT	common cis-acting element in promoter and enhancer regions
LcbHLH49	TCA-element	CCATCTTTTT	cis-acting element involved in salicylic acid responsiveness
LcbHLH49	LTR	CCGAAA	cis-acting element involved in low-temperature responsiveness
LcbHLH49	AT~TATA-box	TATATA	Unknown
LcbHLH49	W box	TTGACC	Unknown
LcbHLH49	CTAG-motif	ACTAGCAGAA	Unknown
LcbHLH49	MYC	CATTTG	Unknown
LcbHLH49	TATA-box	ATTATA	core promoter element around -30 of transcription start
LcbHLH49	F-box	CTATTCTCATT	Unknown
LcbHLH49	P-box	CCTTTTG	gibberellin-responsive element
LcbHLH49	Unnamed__1	GAATTTAATTAA	60K protein binding site
LcbHLH50	MRE	AACCTAA	MYB binding site involved in light responsiveness
LcbHLH50	O2-site	GTTGACGTGA	cis-acting regulatory element involved in zein metabolism regulation
LcbHLH50	Myb-binding site	CAACAG	Unknown
LcbHLH50	TGACG-motif	TGACG	cis-acting regulatory element involved in the MeJA-responsiveness
LcbHLH50	G-Box	CACGTT	cis-acting regulatory element involved in light responsiveness
LcbHLH50	chs-CMA2a	TCACTTGA	part of a light responsive element
LcbHLH50	CAT-box	GCCACT	cis-acting regulatory element related to meristem expression
LcbHLH50	GT1-motif	GGTTAAT	light responsive element
LcbHLH50	ABRE	ACGTG	cis-acting element involved in the abscisic acid responsiveness
LcbHLH50	CGTCA-motif	CGTCA	cis-acting regulatory element involved in the MeJA-responsiveness
LcbHLH50	TGA-element	AACGAC	auxin-responsive element
LcbHLH50	Box 4	ATTAAT	part of a conserved DNA module involved in light responsiveness
LcbHLH50	MYB	CAACAG	Unknown
LcbHLH50	TCT-motif	TCTTAC	part of a light responsive element
LcbHLH50	Sp1	GGGCGG	light responsive element
LcbHLH50	as-1	TGACG	Unknown
LcbHLH50	STRE	AGGGG	Unknown
LcbHLH50	ERE	ATTTTAAA	Unknown
LcbHLH50	Unnamed__4	CTCC	Unknown
LcbHLH50	MBS	CAACTG	MYB binding site involved in drought-inducibility
LcbHLH50	ARE	AAACCA	cis-acting regulatory element essential for the anaerobic induction
LcbHLH50	Unnamed__2	AACCTAACCT	Unknown
LcbHLH50	AE-box	AGAAACTT	part of a module for light response
LcbHLH50	TCA-element	TCAGAAGAGG	cis-acting element involved in salicylic acid responsiveness
LcbHLH50	CAAT-box	CAAT	Unknown
LcbHLH50	MYC	CAATTG	Unknown
LcbHLH50	AT~TATA-box	TATATA	Unknown
LcbHLH50	TATA-box	TATAAA	core promoter element around -30 of transcription start
LcbHLH50	GATA-motif	AAGGATAAGG	part of a light responsive element
LcbHLH50	P-box	CCTTTTG	gibberellin-responsive element
LcbHLH51	Unnamed__6	taTAAATATct	Unknown
LcbHLH51	TATC-box	TATCCCA	cis-acting element involved in gibberellin-responsiveness
LcbHLH51	TGACG-motif	TGACG	cis-acting regulatory element involved in the MeJA-responsiveness
LcbHLH51	O2-site	GATGATGTGG	cis-acting regulatory element involved in zein metabolism regulation
LcbHLH51	Myb-binding site	CAACAG	Unknown
LcbHLH51	ATCT-motif	AATCTAATCC	part of a conserved DNA module involved in light responsiveness
LcbHLH51	MRE	AACCTAA	MYB binding site involved in light responsiveness
LcbHLH51	MYB recognition site	CCGTTG	Unknown
LcbHLH51	MYB-like sequence	TAACCA	Unknown
LcbHLH51	WUN-motif	TAATTACTC	Unknown
LcbHLH51	DRE core	GCCGAC	Unknown
LcbHLH51	CCAAT-box	CAACGG	MYBHv1 binding site
LcbHLH51	CGTCA-motif	CGTCA	cis-acting regulatory element involved in the MeJA-responsiveness
LcbHLH51	ABRE	ACGTG	cis-acting element involved in the abscisic acid responsiveness
LcbHLH51	MBSI	aaaAaaC(G/C)GTTA	MYB binding site involved in flavonoid biosynthetic genes regulation
LcbHLH51	TGA-box	TGACGTAA	part of an auxin-responsive element
LcbHLH51	G-box	TACGTG	cis-acting regulatory element involved in light responsiveness
LcbHLH51	TCT-motif	TCTTAC	part of a light responsive element
LcbHLH51	HD-Zip 1	CAAT(A/T)ATTG	element involved in differentiation of the palisade mesophyll cells
LcbHLH51	MYB	TAACCA	Unknown
LcbHLH51	ABRE4	CACGTA	Unknown
LcbHLH51	Box 4	ATTAAT	part of a conserved DNA module involved in light responsiveness
LcbHLH51	ARE	AAACCA	cis-acting regulatory element essential for the anaerobic induction
LcbHLH51	ERE	ATTTTAAA	Unknown
LcbHLH51	Unnamed__4	CTCC	Unknown
LcbHLH51	STRE	AGGGG	Unknown
LcbHLH51	AT-rich element	ATAGAAATCAA	binding site of AT-rich DNA binding protein (ATBP-1)
LcbHLH51	as-1	TGACG	Unknown
LcbHLH51	CAAT-box	CAAT	Unknown
LcbHLH51	TCA	TCATCTTCAT	Unknown
LcbHLH51	AT1-motif	AATTATTTTTTATT	part of a light responsive module
LcbHLH51	TC-rich repeats	GTTTTCTTAC	cis-acting element involved in defense and stress responsiveness
LcbHLH51	WRE3	CCACCT	Unknown
LcbHLH51	W box	TTGACC	Unknown
LcbHLH51	AT~TATA-box	TATATA	Unknown
LcbHLH51	MYC	CAATTG	Unknown
LcbHLH51	ACE	GACACGTATG	cis-acting element involved in light responsiveness
LcbHLH51	TATA-box	TATAA	core promoter element around -30 of transcription start
LcbHLH51	ABRE3a	TACGTG	Unknown
LcbHLH51	Unnamed__1	GAATTTAATTAA	60K protein binding site
LcbHLH52	GA-motif	ATAGATAA	part of a light responsive element
LcbHLH52	Myb	CAACTG	Unknown
LcbHLH52	TATA-box	TATTTAAA	core promoter element around -30 of transcription start
LcbHLH52	Unnamed__10	TCCACGTAGA	Unknown
LcbHLH52	ABRE3a	TACGTG	Unknown
LcbHLH52	MSA-like	TCAAACGGT	cis-acting element involved in cell cycle regulation
LcbHLH52	Unnamed__1	CGTGG	Unknown
LcbHLH52	P-box	CCTTTTG	gibberellin-responsive element
LcbHLH52	TCCC-motif	TCTCCCT	part of a light responsive element
LcbHLH52	AE-box	AGAAACAA	part of a module for light response
LcbHLH52	CAAT-box	CAAT	Unknown
LcbHLH52	MYC	CATGTG	Unknown
LcbHLH52	W box	TTGACC	Unknown
LcbHLH52	chs-CMA2c	ATGTACGTGGAGG	part of a light responsive element
LcbHLH52	AT~TATA-box	TATATA	Unknown
LcbHLH52	ABRE4	CACGTA	Unknown
LcbHLH52	AAGAA-motif	gGTAAAGAAA	Unknown
LcbHLH52	Box 4	ATTAAT	part of a conserved DNA module involved in light responsiveness
LcbHLH52	Unnamed__14	TCCACGTAGA	Unknown
LcbHLH52	TCT-motif	TCTTAC	part of a light responsive element
LcbHLH52	G-box	TACGTG	cis-acting regulatory element involved in light responsiveness
LcbHLH52	STRE	AGGGG	Unknown
LcbHLH52	as-1	TGACG	Unknown
LcbHLH52	MBS	CAACTG	MYB binding site involved in drought-inducibility
LcbHLH52	Unnamed__8	TCCACGTAGA	Unknown
LcbHLH52	ARE	AAACCA	cis-acting regulatory element essential for the anaerobic induction
LcbHLH52	Unnamed__4	CTCC	Unknown
LcbHLH52	ERE	ATTTTAAA	Unknown
LcbHLH52	ATCT-motif	AATCTAATCC	part of a conserved DNA module involved in light responsiveness
LcbHLH52	Myb-binding site	CAACAG	Unknown
LcbHLH52	TGACG-motif	TGACG	cis-acting regulatory element involved in the MeJA-responsiveness
LcbHLH52	CAT-box	GCCACT	cis-acting regulatory element related to meristem expression
LcbHLH52	Unnamed__12	TCCACGTAGA	Unknown
LcbHLH52	ABRE	ACGTG	cis-acting element involved in the abscisic acid responsiveness
LcbHLH52	WUN-motif	AAATTACT	Unknown
LcbHLH52	MYB-like sequence	TAACCA	Unknown
LcbHLH52	CGTCA-motif	CGTCA	cis-acting regulatory element involved in the MeJA-responsiveness
LcbHLH53	CAT-box	GCCACT	cis-acting regulatory element related to meristem expression
LcbHLH53	Unnamed__12	TCCACGTAGA	Unknown
LcbHLH53	ABRE	ACGTG	cis-acting element involved in the abscisic acid responsiveness
LcbHLH53	CGTCA-motif	CGTCA	cis-acting regulatory element involved in the MeJA-responsiveness
LcbHLH53	WUN-motif	AAATTACT	Unknown
LcbHLH53	MYB-like sequence	TAACCA	Unknown
LcbHLH53	ATCT-motif	AATCTAATCC	part of a conserved DNA module involved in light responsiveness
LcbHLH53	Myb-binding site	CAACAG	Unknown
LcbHLH53	TGACG-motif	TGACG	cis-acting regulatory element involved in the MeJA-responsiveness
LcbHLH53	G-Box	CACGTT	cis-acting regulatory element involved in light responsiveness
LcbHLH53	as-1	TGACG	Unknown
LcbHLH53	STRE	AGGGG	Unknown
LcbHLH53	Unnamed__4	CTCC	Unknown
LcbHLH53	ERE	ATTTTAAA	Unknown
LcbHLH53	ATC-motif	AGTAATCT	part of a conserved DNA module involved in light responsiveness
LcbHLH53	MBS	CAACTG	MYB binding site involved in drought-inducibility
LcbHLH53	Unnamed__8	TCCACGTAGA	Unknown
LcbHLH53	ARE	AAACCA	cis-acting regulatory element essential for the anaerobic induction
LcbHLH53	Box 4	ATTAAT	part of a conserved DNA module involved in light responsiveness
LcbHLH53	AAGAA-motif	gGTAAAGAAA	Unknown
LcbHLH53	Unnamed__14	TCCACGTAGA	Unknown
LcbHLH53	ABRE4	CACGTA	Unknown
LcbHLH53	MYB	CAACAG	Unknown
LcbHLH53	TCT-motif	TCTTAC	part of a light responsive element
LcbHLH53	MYC	CATGTG	Unknown
LcbHLH53	chs-CMA2c	ATGTACGTGGAGG	part of a light responsive element
LcbHLH53	AT~TATA-box	TATATA	Unknown
LcbHLH53	W box	TTGACC	Unknown
LcbHLH53	AE-box	AGAAACAA	part of a module for light response
LcbHLH53	CAAT-box	CAAAT	common cis-acting element in promoter and enhancer regions
LcbHLH53	Unnamed__1	CGTGG	Unknown
LcbHLH53	ABRE3a	TACGTG	Unknown
LcbHLH53	P-box	CCTTTTG	gibberellin-responsive element
LcbHLH53	TCCC-motif	TCTCCCT	part of a light responsive element
LcbHLH53	GA-motif	ATAGATAA	part of a light responsive element
LcbHLH53	TATA-box	TATA	core promoter element around -30 of transcription start
LcbHLH53	Unnamed__10	TCCACGTAGA	Unknown
LcbHLH54	Unnamed__1	CGTGG	Unknown
LcbHLH54	MSA-like	TCCAACGGT	cis-acting element involved in cell cycle regulation
LcbHLH54	ABRE3a	TACGTG	Unknown
LcbHLH54	TATA-box	TATAAAT	core promoter element around -30 of transcription start
LcbHLH54	F-box	CTATTCTCATT	Unknown
LcbHLH54	AT~TATA-box	TATATA	Unknown
LcbHLH54	W box	TTGACC	Unknown
LcbHLH54	RY-element	CATGCATG	cis-acting regulatory element involved in seed-specific regulation
LcbHLH54	MYC	CATGTG	Unknown
LcbHLH54	CAAT-box	CAAT	Unknown
LcbHLH54	Unnamed__4	CTCC	Unknown
LcbHLH54	ERE	ATTTCATA	Unknown
LcbHLH54	ARE	AAACCA	cis-acting regulatory element essential for the anaerobic induction
LcbHLH54	as-1	TGACG	Unknown
LcbHLH54	chs-CMA1a	TTACTTAA	part of a light responsive element
LcbHLH54	STRE	AGGGG	Unknown
LcbHLH54	G-box	TACGTG	cis-acting regulatory element involved in light responsiveness
LcbHLH54	TATA	TATAAAAT	Unknown
LcbHLH54	Box 4	ATTAAT	part of a conserved DNA module involved in light responsiveness
LcbHLH54	ABRE4	CACGTA	Unknown
LcbHLH54	MYB	CAACAG	Unknown
LcbHLH54	CGTCA-motif	CGTCA	cis-acting regulatory element involved in the MeJA-responsiveness
LcbHLH54	CCAAT-box	CAACGG	MYBHv1 binding site
LcbHLH54	WUN-motif	CCATTTCAA	Unknown
LcbHLH54	ABRE	ACGTG	cis-acting element involved in the abscisic acid responsiveness
LcbHLH54	Myb-binding site	CAACAG	Unknown
LcbHLH54	O2-site	GATGACATGG	cis-acting regulatory element involved in zein metabolism regulation
LcbHLH54	TGACG-motif	TGACG	cis-acting regulatory element involved in the MeJA-responsiveness
LcbHLH54	Unnamed__6	taTAAATATct	Unknown
LcbHLH54	MYB recognition site	CCGTTG	Unknown
LcbHLH55	TCCC-motif	TCTCCCT	part of a light responsive element
LcbHLH55	CCGTCC motif	CCGTCC	Unknown
LcbHLH55	A-box	CCGTCC	cis-acting regulatory element
LcbHLH55	TATA-box	TATATA	core promoter element around -30 of transcription start
LcbHLH55	Myb	TAACTG	Unknown
LcbHLH55	CCGTCC-box	CCGTCC	Unknown
LcbHLH55	GA-motif	ATAGATAA	part of a light responsive element
LcbHLH55	L-box	ATCCCACCTAC	part of a light responsive element
LcbHLH55	AT~TATA-box	TATATA	Unknown
LcbHLH55	MYC	CAATTG	Unknown
LcbHLH55	CAAT-box	CAAT	Unknown
LcbHLH55	TCA-element	TCAGAAGAGG	cis-acting element involved in salicylic acid responsiveness
LcbHLH55	WRE3	CCACCT	Unknown
LcbHLH55	ATC-motif	AGTAATCT	part of a conserved DNA module involved in light responsiveness
LcbHLH55	Unnamed__4	CTCC	Unknown
LcbHLH55	ARE	AAACCA	cis-acting regulatory element essential for the anaerobic induction
LcbHLH55	STRE	AGGGG	Unknown
LcbHLH55	3-AF1 binding site	TAAGAGAGGAA	light responsive element
LcbHLH55	Box 4	ATTAAT	part of a conserved DNA module involved in light responsiveness
LcbHLH55	AAGAA-motif	GAAAGAA	Unknown
LcbHLH55	TATA	TATAAAAT	Unknown
LcbHLH55	CCAAT-box	CAACGG	MYBHv1 binding site
LcbHLH55	TGA-element	AACGAC	auxin-responsive element
LcbHLH55	WUN-motif	AAATTACT	Unknown
LcbHLH55	GT1-motif	GGTTAA	light responsive element
LcbHLH55	O2-site	GATGATGTGG	cis-acting regulatory element involved in zein metabolism regulation
LcbHLH55	TATC-box	TATCCCA	cis-acting element involved in gibberellin-responsiveness
LcbHLH55	MYB recognition site	CCGTTG	Unknown
LcbHLH55	ATCT-motif	AATCTAATCC	part of a conserved DNA module involved in light responsiveness
LcbHLH56	CGTCA-motif	CGTCA	cis-acting regulatory element involved in the MeJA-responsiveness
LcbHLH56	CCAAT-box	CAACGG	MYBHv1 binding site
LcbHLH56	TGA-element	AACGAC	auxin-responsive element
LcbHLH56	Unnamed__12	TCCACGTAGA	Unknown
LcbHLH56	GT1-motif	GTGTGTGAA	light responsive element
LcbHLH56	ABRE	CGTACGTGCA	cis-acting element involved in the abscisic acid responsiveness
LcbHLH56	Myb-binding site	CAACAG	Unknown
LcbHLH56	O2-site	GATGATGTGG	cis-acting regulatory element involved in zein metabolism regulation
LcbHLH56	TGACG-motif	TGACG	cis-acting regulatory element involved in the MeJA-responsiveness
LcbHLH56	G-Box	CACGTG	cis-acting regulatory element involved in light responsiveness
LcbHLH56	MYB recognition site	CCGTTG	Unknown
LcbHLH56	Unnamed__4	CTCC	Unknown
LcbHLH56	Unnamed__8	TCCACGTAGA	Unknown
LcbHLH56	MBS	CAACTG	MYB binding site involved in drought-inducibility
LcbHLH56	ARE	AAACCA	cis-acting regulatory element essential for the anaerobic induction
LcbHLH56	as-1	TGACG	Unknown
LcbHLH56	STRE	AGGGG	Unknown
LcbHLH56	TCT-motif	TCTTAC	part of a light responsive element
LcbHLH56	AAGAA-motif	GAAAGAA	Unknown
LcbHLH56	Unnamed__14	TCCACGTAGA	Unknown
LcbHLH56	ABRE4	CACGTA	Unknown
LcbHLH56	MYB	CAACAG	Unknown
LcbHLH56	AT~TATA-box	TATATA	Unknown
LcbHLH56	CTAG-motif	ACTAGCAGAA	Unknown
LcbHLH56	MYC	CAATTG	Unknown
LcbHLH56	ABRE2	CCACGTGG	Unknown
LcbHLH56	AE-box	AGAAACAA	part of a module for light response
LcbHLH56	TCA	TCATCTTCAT	Unknown
LcbHLH56	CAAT-box	CAAT	Unknown
LcbHLH56	Box II	CCACGTGGC	part of a light responsive element
LcbHLH56	MSA-like	TCCAACGGT	cis-acting element involved in cell cycle regulation
LcbHLH56	Unnamed__1	GCCACGTGGC	Unknown
LcbHLH56	GATA-motif	AAGATAAGATT	part of a light responsive element
LcbHLH56	ABRE3a	TACGTG	Unknown
LcbHLH56	TATA-box	ATATAT	core promoter element around -30 of transcription start
LcbHLH56	ACE	GACACGTATG	cis-acting element involved in light responsiveness
LcbHLH56	Unnamed__10	TCCACGTAGA	Unknown
LcbHLH57	TATA-box	ATTATA	core promoter element around -30 of transcription start
LcbHLH57	Myb	TAACTG	Unknown
LcbHLH57	GA-motif	ATAGATAA	part of a light responsive element
LcbHLH57	TCCC-motif	TCTCCCT	part of a light responsive element
LcbHLH57	GATA-motif	GATAGGA	part of a light responsive element
LcbHLH57	TCA-element	CCATCTTTTT	cis-acting element involved in salicylic acid responsiveness
LcbHLH57	CAAT-box	CAAAT	common cis-acting element in promoter and enhancer regions
LcbHLH57	WRE3	CCACCT	Unknown
LcbHLH57	Unnamed__2	CCCCGG	Unknown
LcbHLH57	AT~TATA-box	TATATA	Unknown
LcbHLH57	MYC	CATTTG	Unknown
LcbHLH57	TCT-motif	TCTTAC	part of a light responsive element
LcbHLH57	Box 4	ATTAAT	part of a conserved DNA module involved in light responsiveness
LcbHLH57	ARE	AAACCA	cis-acting regulatory element essential for the anaerobic induction
LcbHLH57	Unnamed__4	CTCC	Unknown
LcbHLH57	ERE	ATTTTAAA	Unknown
LcbHLH57	STRE	AGGGG	Unknown
LcbHLH57	WUN-motif	AAATTACT	Unknown
LcbHLH57	TGA-element	AACGAC	auxin-responsive element
LcbHLH57	GC-motif	CCCCCG	enhancer-like element involved in anoxic specific inducibility
LcbHLH58	WRE3	CCACCT	Unknown
LcbHLH58	LTR	CCGAAA	cis-acting element involved in low-temperature responsiveness
LcbHLH58	TCA-element	CCATCTTTTT	cis-acting element involved in salicylic acid responsiveness
LcbHLH58	CAAT-box	CAAAT	common cis-acting element in promoter and enhancer regions
LcbHLH58	MYC	CAATTG	Unknown
LcbHLH58	AT~TATA-box	TATATA	Unknown
LcbHLH58	GA-motif	ATAGATAA	part of a light responsive element
LcbHLH58	Myb	TAACTG	Unknown
LcbHLH58	TATA-box	ATTATA	core promoter element around -30 of transcription start
LcbHLH58	GATA-motif	GATAGGA	part of a light responsive element
LcbHLH58	Unnamed__1	CGTGG	Unknown
LcbHLH58	TCCC-motif	TCTCCCT	part of a light responsive element
LcbHLH58	Box II	TGGTAATAA	part of a light responsive element
LcbHLH58	Unnamed__6	taTAAATATct	Unknown
LcbHLH58	TGACG-motif	TGACG	cis-acting regulatory element involved in the MeJA-responsiveness
LcbHLH58	TGA-element	AACGAC	auxin-responsive element
LcbHLH58	WUN-motif	CAATTACAT	Unknown
LcbHLH58	MYB-like sequence	TAACCA	Unknown
LcbHLH58	CGTCA-motif	CGTCA	cis-acting regulatory element involved in the MeJA-responsiveness
LcbHLH58	TATA	TATAAAAT	Unknown
LcbHLH58	Box 4	ATTAAT	part of a conserved DNA module involved in light responsiveness
LcbHLH58	TCT-motif	TCTTAC	part of a light responsive element
LcbHLH58	STRE	AGGGG	Unknown
LcbHLH58	as-1	TGACG	Unknown
LcbHLH58	ARE	AAACCA	cis-acting regulatory element essential for the anaerobic induction
LcbHLH58	ERE	ATTTTAAA	Unknown
LcbHLH58	Unnamed__4	CTCC	Unknown
LcbHLH59	MYC	CATGTG	Unknown
LcbHLH59	AT~TATA-box	TATATA	Unknown
LcbHLH59	LAMP-element	CTTTATCA	part of a light responsive element
LcbHLH59	CARE	CAACTCCC	Unknown
LcbHLH59	LTR	CCGAAA	cis-acting element involved in low-temperature responsiveness
LcbHLH59	TC-rich repeats	ATTCTCTAAC	cis-acting element involved in defense and stress responsiveness
LcbHLH59	WRE3	CCACCT	Unknown
LcbHLH59	CAAT-box	CAAAT	common cis-acting element in promoter and enhancer regions
LcbHLH59	TCA-element	TCAGAAGAGG	cis-acting element involved in salicylic acid responsiveness
LcbHLH59	TCCC-motif	TCTCCCT	part of a light responsive element
LcbHLH59	Myb	TAACTG	Unknown
LcbHLH59	box S	AGCCACC	Unknown
LcbHLH59	TATA-box	TATAAAT	core promoter element around -30 of transcription start
LcbHLH59	CCAAT-box	CAACGG	MYBHv1 binding site
LcbHLH59	CGTCA-motif	CGTCA	cis-acting regulatory element involved in the MeJA-responsiveness
LcbHLH59	GCN4_motif	TGAGTCA	cis-regulatory element involved in endosperm expression
LcbHLH59	DRE core	GCCGAC	Unknown
LcbHLH59	WUN-motif	TAATTACTC	Unknown
LcbHLH59	MYB recognition site	CCGTTG	Unknown
LcbHLH59	TGACG-motif	TGACG	cis-acting regulatory element involved in the MeJA-responsiveness
LcbHLH59	O2-site	GATGACATGG	cis-acting regulatory element involved in zein metabolism regulation
LcbHLH59	as-1	TGACG	Unknown
LcbHLH59	circadian	CAAAGATATC	cis-acting regulatory element involved in circadian control
LcbHLH59	STRE	AGGGG	Unknown
LcbHLH59	Unnamed__4	CTCC	Unknown
LcbHLH59	ARE	AAACCA	cis-acting regulatory element essential for the anaerobic induction
LcbHLH59	AAGAA-motif	GAAAGAA	Unknown
LcbHLH59	Box 4	ATTAAT	part of a conserved DNA module involved in light responsiveness
LcbHLH59	G-box	TAACACGTAG	cis-acting regulatory element involved in light responsiveness
LcbHLH59	Sp1	GGGCGG	light responsive element
LcbHLH60	CAAT-box	CAAAT	common cis-acting element in promoter and enhancer regions
LcbHLH60	TCA-element	CCATCTTTTT	cis-acting element involved in salicylic acid responsiveness
LcbHLH60	LTR	CCGAAA	cis-acting element involved in low-temperature responsiveness
LcbHLH60	TC-rich repeats	ATTCTCTAAC	cis-acting element involved in defense and stress responsiveness
LcbHLH60	AT~TATA-box	TATATA	Unknown
LcbHLH60	LAMP-element	CTTTATCA	part of a light responsive element
LcbHLH60	CARE	CAACTCCC	Unknown
LcbHLH60	MYC	CATTTG	Unknown
LcbHLH60	box S	AGCCACC	Unknown
LcbHLH60	TATA-box	TATACA	core promoter element around -30 of transcription start
LcbHLH60	Myb	TAACTG	Unknown
LcbHLH60	TCCC-motif	TCTCCCT	part of a light responsive element
LcbHLH60	GATA-motif	GATAGGG	part of a light responsive element
LcbHLH60	TGACG-motif	TGACG	cis-acting regulatory element involved in the MeJA-responsiveness
LcbHLH60	O2-site	GATGACATGG	cis-acting regulatory element involved in zein metabolism regulation
LcbHLH60	Myb-binding site	CAACAG	Unknown
LcbHLH60	MYB recognition site	CCGTTG	Unknown
LcbHLH60	CCAAT-box	CAACGG	MYBHv1 binding site
LcbHLH60	CGTCA-motif	CGTCA	cis-acting regulatory element involved in the MeJA-responsiveness
LcbHLH60	GCN4_motif	TGAGTCA	cis-regulatory element involved in endosperm expression
LcbHLH60	WUN-motif	TAATTACTC	Unknown
LcbHLH60	DRE core	GCCGAC	Unknown
LcbHLH60	G-box	TAACACGTAG	cis-acting regulatory element involved in light responsiveness
LcbHLH60	Sp1	GGGCGG	light responsive element
LcbHLH60	Box 4	ATTAAT	part of a conserved DNA module involved in light responsiveness
LcbHLH60	AAGAA-motif	GAAAGAA	Unknown
LcbHLH60	Unnamed__4	CTCC	Unknown
LcbHLH60	ARE	AAACCA	cis-acting regulatory element essential for the anaerobic induction
LcbHLH60	as-1	TGACG	Unknown
LcbHLH60	circadian	CAAAGATATC	cis-acting regulatory element involved in circadian control
LcbHLH60	STRE	AGGGG	Unknown
LcbHLH61	TC-rich repeats	ATTCTCTAAC	cis-acting element involved in defense and stress responsiveness
LcbHLH61	AT1-motif	AATTATTTTTTATT	part of a light responsive module
LcbHLH61	Myc	TCTCTTA	Unknown
LcbHLH61	TCA	TCATCTTCAT	Unknown
LcbHLH61	CAAT-box	CAAAT	common cis-acting element in promoter and enhancer regions
LcbHLH61	AT~TATA-box	TATATA	Unknown
LcbHLH61	W box	TTGACC	Unknown
LcbHLH61	GA-motif	ATAGATAA	part of a light responsive element
LcbHLH61	Myb	TAACTG	Unknown
LcbHLH61	CCGTCC-box	CCGTCC	Unknown
LcbHLH61	AP-1	TGAGTTAG	Unknown
LcbHLH61	TATA-box	TATA	core promoter element around -30 of transcription start
LcbHLH61	A-box	CCGTCC	cis-acting regulatory element
LcbHLH61	Unnamed__1	CGTGG	Unknown
LcbHLH61	I-box	TGATAATGT	part of a light responsive element
LcbHLH61	P-box	CCTTTTG	gibberellin-responsive element
LcbHLH61	CCGTCC motif	CCGTCC	Unknown
LcbHLH61	Myb-binding site	CAACAG	Unknown
LcbHLH61	O2-site	GATGATGTGG	cis-acting regulatory element involved in zein metabolism regulation
LcbHLH61	G-Box	CACGTG	cis-acting regulatory element involved in light responsiveness
LcbHLH61	Unnamed__6	taTAAATATct	Unknown
LcbHLH61	ABRE	CACGTG	cis-acting element involved in the abscisic acid responsiveness
LcbHLH61	GT1-motif	GGTTAA	light responsive element
LcbHLH61	WUN-motif	AAATTTCCT	wound-responsive element
LcbHLH61	MYB-like sequence	TAACCA	Unknown
LcbHLH61	AAGAA-motif	GAAAGAA	Unknown
LcbHLH61	Box 4	ATTAAT	part of a conserved DNA module involved in light responsiveness
LcbHLH61	HD-Zip 1	CAAT(A/T)ATTG	element involved in differentiation of the palisade mesophyll cells
LcbHLH61	TCT-motif	TCTTAC	part of a light responsive element
LcbHLH61	Sp1	GGGCGG	light responsive element
LcbHLH61	STRE	AGGGG	Unknown
LcbHLH61	ERE	ATTTTAAA	Unknown
LcbHLH61	Unnamed__4	CTCC	Unknown
LcbHLH61	ARE	AAACCA	cis-acting regulatory element essential for the anaerobic induction
LcbHLH62	AT~TATA-box	TATATA	Unknown
LcbHLH62	W box	TTGACC	Unknown
LcbHLH62	MYC	CATTTG	Unknown
LcbHLH62	AT1-motif	AATTATTTTTTATT	part of a light responsive module
LcbHLH62	TCA	TCATCTTCAT	Unknown
LcbHLH62	CAAT-box	CAAT	Unknown
LcbHLH62	CCGTCC motif	CCGTCC	Unknown
LcbHLH62	TCCC-motif	TCTCCCT	part of a light responsive element
LcbHLH62	P-box	CCTTTTG	gibberellin-responsive element
LcbHLH62	Box III	atCATTTTCACt	protein binding site
LcbHLH62	I-box	TGATAATGT	part of a light responsive element
LcbHLH62	Unnamed__1	CGTGG	Unknown
LcbHLH62	A-box	CCGTCC	cis-acting regulatory element
LcbHLH62	TATA-box	taTATAAAtc	core promoter element around -30 of transcription start
LcbHLH62	GA-motif	ATAGATAA	part of a light responsive element
LcbHLH62	Myb	TAACTG	Unknown
LcbHLH62	CCGTCC-box	CCGTCC	Unknown
LcbHLH62	CGTCA-motif	CGTCA	cis-acting regulatory element involved in the MeJA-responsiveness
LcbHLH62	MYB-like sequence	TAACCA	Unknown
LcbHLH62	GT1-motif	GGTTAA	light responsive element
LcbHLH62	ABRE	ACGTG	cis-acting element involved in the abscisic acid responsiveness
LcbHLH62	TGACG-motif	TGACG	cis-acting regulatory element involved in the MeJA-responsiveness
LcbHLH62	Myb-binding site	CAACAG	Unknown
LcbHLH62	O2-site	GATGATGTGG	cis-acting regulatory element involved in zein metabolism regulation
LcbHLH62	Unnamed__6	taTAAATATct	Unknown
LcbHLH62	G-Box	CACGTG	cis-acting regulatory element involved in light responsiveness
LcbHLH62	Unnamed__4	CTCC	Unknown
LcbHLH62	ERE	ATTTTAAA	Unknown
LcbHLH62	ARE	AAACCA	cis-acting regulatory element essential for the anaerobic induction
LcbHLH62	as-1	TGACG	Unknown
LcbHLH62	STRE	AGGGG	Unknown
LcbHLH62	TCT-motif	TCTTAC	part of a light responsive element
LcbHLH62	TATA	TATAAAAT	Unknown
LcbHLH62	AAGAA-motif	GAAAGAA	Unknown
LcbHLH62	Box 4	ATTAAT	part of a conserved DNA module involved in light responsiveness
LcbHLH63	ABRE3a	TACGTG	Unknown
LcbHLH63	Unnamed__1	GAATTTAATTAA	60K protein binding site
LcbHLH63	box S	AGCCACC	Unknown
LcbHLH63	TATA-box	TATTTAAA	core promoter element around -30 of transcription start
LcbHLH63	ACE	GACACGTATG	cis-acting element involved in light responsiveness
LcbHLH63	E2Fb	TTTGCCGC	Unknown
LcbHLH63	GARE-motif	TCTGTTG	gibberellin-responsive element
LcbHLH63	AuxRR-core	GGTCCAT	cis-acting regulatory element involved in auxin responsiveness
LcbHLH63	AT~TATA-box	TATATA	Unknown
LcbHLH63	MYC	CATTTG	Unknown
LcbHLH63	CAAT-box	CAAT	Unknown
LcbHLH63	WRE3	CCACCT	Unknown
LcbHLH63	TC-rich repeats	GTTTTCTTAC	cis-acting element involved in defense and stress responsiveness
LcbHLH63	LTR	CCGAAA	cis-acting element involved in low-temperature responsiveness
LcbHLH63	ARE	AAACCA	cis-acting regulatory element essential for the anaerobic induction
LcbHLH63	Unnamed__4	CTCC	Unknown
LcbHLH63	STRE	AGGGG	Unknown
LcbHLH63	AAAC-motif	CAATCAAAACCT	light responsive element
LcbHLH63	chs-CMA1a	TTACTTAA	part of a light responsive element
LcbHLH63	G-box	TACGTG	cis-acting regulatory element involved in light responsiveness
LcbHLH63	TCT-motif	TCTTAC	part of a light responsive element
LcbHLH63	MYB	CAACAG	Unknown
LcbHLH63	ABRE4	CACGTA	Unknown
LcbHLH63	AAGAA-motif	gGTAAAGAAA	Unknown
LcbHLH63	Box 4	ATTAAT	part of a conserved DNA module involved in light responsiveness
LcbHLH63	GCN4_motif	TGAGTCA	cis-regulatory element involved in endosperm expression
LcbHLH63	ABRE	ACGTG	cis-acting element involved in the abscisic acid responsiveness
LcbHLH63	Unnamed__6	taTAAATATct	Unknown
LcbHLH63	Myb-binding site	CAACAG	Unknown
LcbHLH64	TATC-box	TATCCCA	cis-acting element involved in gibberellin-responsiveness
LcbHLH64	Myb-binding site	CAACAG	Unknown
LcbHLH64	GCN4_motif	TGAGTCA	cis-regulatory element involved in endosperm expression
LcbHLH64	MYB	CAACAG	Unknown
LcbHLH64	Box 4	ATTAAT	part of a conserved DNA module involved in light responsiveness
LcbHLH64	AAGAA-motif	GAAAGAA	Unknown
LcbHLH64	TCT-motif	TCTTAC	part of a light responsive element
LcbHLH64	chs-CMA1a	TTACTTAA	part of a light responsive element
LcbHLH64	STRE	AGGGG	Unknown
LcbHLH64	HD-Zip 3	GTAAT(G/C)ATTAC	protein binding site
LcbHLH64	MBS	CAACTG	MYB binding site involved in drought-inducibility
LcbHLH64	ARE	AAACCA	cis-acting regulatory element essential for the anaerobic induction
LcbHLH64	ERE	ATTTTAAA	Unknown
[truncated: 3,121 more rows]

## Sheet: TableS9
Figure S9.Transcriptome data FPKM value of LcbHLHs
Gene ID	XNXYF1	XNXYF2	XNXYF3	AVERAGE		XNNCF1	XNNCF2	XNNCF3	AVERAGE		XNFJF1	XNFJF2	XNFJF3	AVERAGE		XNXYI1	XNXYI2	XNXYI3	AVERAGE		XNXYII1	XNXYII2	XNXYII3	AVERAGE		XNNCI1	XNNCI2	XNNCI3	AVERAGE		XNNCII1	XNNCII2	XNNCII3	AVERAGE		XNXJI1	XNXJI2	XNXJI3	AVERAGE		XNXJII1	XNXJII2	XNXJII3	AVERAGE		XNFJI1	XNFJI2	XNFJI3	AVERAGE
LcbHLH3	2.99337	4.83183	4.61063	4.14528		0.493675	0.336225	0.452566	0.427489		3.97603	3.39356	4.55115	3.97358		1.60994	1.35005	1.52253	1.49417		1.4048	2.63678	2.00667	2.01609		0.598915	0.644791	0.437662	0.560456		0.859195	2.36207	1.68403	1.6351		4.33419	3.97361	4.37662	4.22814		8.89425	6.63599	7.49525	7.67516		3.44301	3.54773	3.27351	3.42142
LcbHLH4	60.6639	47.1812	48.8051	52.2167		49.5051	56.6332	57.1161	54.4181		33.9283	42.4339	44.4199	40.2607		92.4613	80.1802	77.256	83.2992		74.075	61.3232	60.1706	65.1896		152.157	171.847	142.037	155.347		67.373	74.4319	63.5159	68.4403		93.7756	89.3189	87.2932	90.1292		63.479	74.6101	74.2451	70.7781		91.7725	91.304	81.7183	88.265
LcbHLH6	19.1844	17.8653	20.5017	19.1838		16.8097	14.3133	13.8042	14.9757		14.1806	19.163	13.8172	15.7203		17.0231	17.4182	18.595	17.6788		14.1283	13.3748	16.717	14.74		20.793	20.5869	18.1167	19.8322		18.9541	21.2224	20.0148	20.0638		24.488	20.9503	25.234	23.5574		18.3803	16.286	18.3169	17.661		15.4413	19.8139	19.6795	18.3115
LcbHLH7	5.50678	4.90131	4.61971	5.00927		8.82755	6.85238	7.43812	7.70602		4.86792	5.75456	4.01106	4.87784		5.1572	6.42765	5.2881	5.62432		5.66938	3.91793	4.04284	4.54339		13.1298	14.1616	10.883	12.7248		10.9875	10.6912	11.2635	10.9808		5.47738	6.21233	6.09366	5.92779		7.05073	6.23349	6.6081	6.63077		8.61417	8.50796	8.9474	8.68984
LcbHLH8	7.35044	6.57528	7.72521	7.21697		5.17461	5.9982	4.73268	5.30183		3.44486	4.83711	3.28742	3.85646		8.78638	13.4127	11.0568	11.0853		9.64538	8.15319	9.73718	9.17858		8.90212	8.42858	6.79233	8.04101		7.52529	6.33364	7.20218	7.02037		7.55173	10.4386	8.55265	8.84766		9.44476	9.86183	9.75851	9.68837		7.04162	7.39889	6.67116	7.03722
LcbHLH9	0.0376507	0	0	0.0125502		0.441349	0.253273	0.350651	0.348424		0.951887	1.90074	0.68062	1.17775		0.0433122	0.141355	0	0.0615557		0.11338	0.0464317	0.0607336	0.0735153		9.90235	9.17213	12.3251	10.4665		10.1243	9.74906	13.2071	11.0268		6.01526	6.45874	6.07561	6.1832		10.893	10.0173	9.53827	10.1495		6.59823	9.33888	7.74991	7.89567
LcbHLH10	3.62777	4.10405	3.67089	3.80091		0.219203	0.0718813	0.0435392	0.111541		0.816603	1.21938	0.643889	0.893289		14.1547	20.7109	19.5911	18.1522		25.0026	23.6146	24.6141	24.4104		5.80303	4.57488	7.25507	5.87766		5.26951	4.64975	6.71758	5.54561		3.39595	3.45715	3.61404	3.48905		6.33831	6.2961	4.77926	5.80456		4.9333	5.63015	4.38991	4.98445
LcbHLH11	0.223367	0.187586	0.742225	0.384393		0	0	0	0		0.449208	0.411117	0.240349	0.366891		3.21194	4.55992	3.33523	3.70236		4.48428	3.9942	4.7741	4.41753		0.245803	0.057888	0.0967197	0.13347		0.154273	0	0	0.0514245		3.72267	3.82179	3.51012	3.68486		3.51512	2.69532	2.87942	3.02996		5.78753	6.57705	6.31712	6.22724
LcbHLH12	0.501808	0.187299	0.171021	0.286709		1.36164	1.01804	0.584184	0.987957		0.128149	0.410488	0.287978	0.275538		7.24788	7.90223	7.47914	7.54308		8.73098	10.5891	8.81408	9.37804		15.2165	12.3691	14.9686	14.1847		13.0932	10.5804	11.4286	11.7007		9.93329	6.78942	6.85258	7.85843		10.7317	8.59872	7.56255	8.96433		4.67548	4.82739	4.93215	4.81167
LcbHLH13	1.72707	3.22312	2.99651	2.6489		2.09608	1.63454	1.94966	1.89343		3.00715	1.84395	2.74814	2.53308		8.45882	6.9016	8.83936	8.06659		11.9777	13.1342	9.49739	11.5364		9.99224	10.932	11.1269	10.6837		10.0006	9.51536	9.51087	9.67559		0.0601537	0.0232586	0.196401	0.0932711		0.0633539	0.184835	0.117331	0.12184		9.29498	11.4709	11.3958	10.7205
LcbHLH14	3.40901	5.08962	3.69399	4.06421		3.18778	2.46401	2.98495	2.87891		5.25691	3.79989	3.48634	4.18105		13.5748	12.744	14.2072	13.5087		20.5608	19.4034	15.2985	18.4209		11.1581	10.632	11.2539	11.0146		15.321	13.4548	13.8224	14.1994		21.5002	21.7022	19.5177	20.9067		27.2646	28.0927	28.6111	27.9894		17.103	20.0677	19.1571	18.7759
LcbHLH15	2.66674	2.40183	1.304	2.12419		1.58565	1.16993	1.14732	1.30097		0.599589	1.40235	0.598847	0.86693		0.800278	0.652952	0.624383	0.692538		0.581923	0.214479	0.794872	0.530425		1.08452	1.38223	0.753076	1.07327		0.32032	0.270958	0.306258	0.299179		4.59767	3.65845	4.73183	4.32932		1.12284	1.36496	1.29969	1.2625		0.819322	0.497404	0.443785	0.586837
LcbHLH17	0.699005	0.782705	0.35734	0.613017		0	0	0	0		0.535523	1.10275	0.150429	0.596235		0.268038	0.109347	0.0570341	0.144806		0.175414	0.143671	0.234906	0.184664		0	0	0	0		0	0	0	0		0.870379	1.24259	1.36624	1.15973		0.493599	0.891476	0.718256	0.70111		1.26231	1.27219	0.644095	1.05953
LcbHLH18	33.5887	30.9315	31.3652	31.9618		37.6669	32.3466	37.2839	35.7658		25.2162	24.4224	33.8041	27.8143		41.4169	44.0567	41.4395	42.3044		38.0642	35.555	43.0701	38.8964		80.7235	73.6878	67.2783	73.8965		39.2368	38.6336	34.3632	37.4112		36.3211	43.8035	39.4405	39.855		51.8355	44.7254	49.0344	48.5317		51.7193	45.5301	53.5148	50.2548
LcbHLH19	0.442241	0.315124	0.575474	0.44428		0.117819	0.0386352	0.0468034	0.0677525		0.184805	0.211419	0.55373	0.316651		11.9785	17.9996	14.8009	14.9263		10.2908	8.82526	10.7654	9.96048		11.2817	9.62735	9.78357	10.2309		7.66384	6.27613	7.56104	7.167		2.81878	4.07368	1.05612	2.64953		6.76484	8.56666	6.08397	7.13849		7.19714	8.46689	6.49722	7.38708
LcbHLH20	12.3949	10.3743	11.2648	11.3446		8.80577	6.49708	7.87069	7.72451		4.31636	2.89693	3.9338	3.71569		7.20136	4.87678	5.4551	5.84441		6.72364	5.17242	3.68575	5.19393		6.81992	6.42453	6.93925	6.7279		5.18836	5.20807	5.95272	5.44971		7.91473	4.84076	7.04768	6.60105		7.65377	8.03288	5.82429	7.17031		3.77483	3.75978	4.04668	3.86043
LcbHLH21	2.64692	2.2619	2.99115	2.63332		1.15673	1.20489	0.324361	0.895327		7.20424	7.91203	6.17598	7.09741		1.92311	0.915297	0.818415	1.21894		1.18864	1.37442	1.01124	1.19143		0.38326	1.22754	0.965165	0.858654		0.256582	0.325564	0.735956	0.439367		2.32178	1.60971	1.11095	1.68081		1.77073	1.80404	1.79586	1.79021		7.08796	6.19378	7.05036	6.77736
LcbHLH22	26.0088	31.6301	29.6604	29.0998		20.102	19.9129	19.6865	19.9005		17.3531	21.4928	16.1151	18.3203		18.6861	16.0956	17.4436	17.4084		22.8081	22.7342	21.515	22.3525		24.5849	21.9744	23.9679	23.509		20.1788	20.7948	20.9874	20.6537		20.8055	19.8148	21.9431	20.8545		16.8379	20.3564	17.5676	18.254		15.7535	19.9896	19.2455	18.3295
LcbHLH23	0	0.132784	0	0.0442614		0	0	0.138051	0.046017		0	0	0	0		11.3225	10.6851	4.41212	8.80657		0.476136	0.146241	0.286929	0.303102		4.17585	2.82738	0.410784	2.47134		0.327612	0.997654	0.125292	0.483519		0	0.210802	0.111254	0.107352		0.143551	0.837619	0	0.327057		2.34632	3.79233	1.31123	2.48329
LcbHLH24	0	0	0	0		0	0	0	0		0	0	0.241458	0.0804861		9.78784	6.14305	6.13365	7.35485		0.0938538	0.115306	0.527876	0.245679		3.18961	3.29546	0.485831	2.32363		0	0.874013	0	0.291338		3.54641	6.64837	3.1579	4.45089		8.14926	6.71438	3.56349	6.14237		1.49761	4.59455	3.65826	3.25014
LcbHLH25	19.7107	19.5351	26.2414	21.829		15.7312	15.6773	7.37212	12.9269		31.0369	90.2437	33.1405	51.4737		3.61828	3.42453	2.29947	3.11409		7.28271	7.6026	7.27223	7.38585		2.49209	3.30405	2.36071	2.71895		3.32133	4.19466	5.62733	4.38111		9.97792	9.35608	14.2036	11.1792		10.0011	10.9603	13.3039	11.4218		2.25226	5.00483	7.6692	4.97543
LcbHLH26	23.7552	33.0613	29.8622	28.8929		23.4127	24.8017	25.5941	24.6028		19.0402	20.2927	17.249	18.8606		77.7054	82.3075	73.5558	77.8563		41.3649	38.9442	44.1725	41.4939		56.9574	57.0683	44.2413	52.7557		35.0473	48.8794	31.2707	38.3991		89.3582	97.2953	92.5347	93.0628		58.7558	50.4716	50.2806	53.1693		84.3912	74.1161	67.6322	75.3798
LcbHLH27	1.764	2.74173	1.96507	2.15693		1.54313	1.29036	1.13406	1.32252		30.5586	27.5797	29.9844	29.3743		0.151436	0.296539	0.232007	0.226661		0.105713	0.324687	0.212348	0.214249		0.260755	0.191051	0.159605	0.203804		0.121228	0.393779	0.166905	0.227304		1.1802	0.468026	0.592819	0.747014		0.637427	0.867858	0.885385	0.79689		4.09306	2.77237	3.24713	3.37085
LcbHLH28	156.768	186.313	155.981	166.354		175.627	172.61	169.003	172.414		142.347	114.738	132.509	129.865		14.4273	16.6895	18.2512	16.456		10.7783	13.1359	13.3714	12.4285		23.0649	21.1044	18.8209	20.9968		23.3361	23.2061	20.7839	22.442		13.2302	11.2235	15.0704	13.1747		9.87862	9.10134	11.8437	10.2746		19.1007	16.2816	12.8593	16.0805
LcbHLH29	0	0	0	0		0.0458437	0.0901985	0.0546341	0.0635588		0.215725	0.444224	0.121195	0.260382		2.75334	1.98218	2.20561	2.31371		1.03638	1.27326	1.09768	1.13577		8.4696	10.6543	12.1114	10.4118		10.5451	9.65127	12.4953	10.8972		14.7798	11.8881	10.4349	12.3676		10.9644	9.44747	8.68008	9.69733		7.16321	13.6172	9.62004	10.1335
LcbHLH30	0	0	0	0		0.420991	0.552207	0.334477	0.435892		0.385204	0.654718	1.07174	0.703887		4.02127	2.96637	2.81313	3.26692		3.02822	1.47633	1.93107	2.14521		16.5463	15.8848	20.2786	17.5699		16.4483	19.024	18.315	17.9291		11.6132	11.4917	6.15476	9.75322		6.6662	12.5712	9.07147	9.43627		20.1675	18.3018	20.0797	19.5163
LcbHLH31	50.6441	74.0567	59.7128	61.4712		21.0188	18.5811	20.3163	19.9721		63.2985	49.145	53.2833	55.2423		17.5092	20.1258	19.5143	19.0498		21.1008	22.7444	23.3523	22.3992		24.3874	26.3141	26.2765	25.6593		30.2929	27.5519	31.8747	29.9065		24.5603	25.911	23.7451	24.7388		20.6155	17.9183	16.4779	18.3372		26.9063	22.7385	26.3559	25.3336
LcbHLH32	27.7186	26.5779	32.4124	28.903		21.2935	22.189	20.4891	21.3239		27.8952	28.5866	29.0035	28.4951		21.5467	21.571	20.0782	21.0653		19.1254	15.399	17.0167	17.1804		23.2768	20.9788	18.5046	20.9201		16.8025	19.9236	15.4678	17.398		20.1673	19.5182	22.9249	20.8701		14.3339	15.1436	13.9368	14.4714		23.3272	21.0327	22.7067	22.3555
LcbHLH33	2.27292	4.73913	0.721209	2.57775		0.306249	1.54404	1.32302	1.05777		5.0889	3.33848	3.40714	3.94484		17.4464	4.59774	0.11511	7.3864		20.7305	5.02611	12.5163	12.7577		4.13995	6.66238	1.01813	3.94015		6.27937	12.1253	8.3638	8.92284		6.89151	12.7832	1.10298	6.92589		1.42316	13.4712	25.698	13.5308		1.29231	14.7332	6.36646	7.464
LcbHLH34	0.471065	1.05494	0.656768	0.727592		0.334662	0.164614	0.199416	0.232897		0.836616	0.450397	0.663549	0.650188		3.84256	3.05478	4.02527	3.64087		6.0181	5.33398	4.35196	5.23468		1.79077	2.6192	2.07683	2.16227		1.41971	1.96153	1.35739	1.57954		1.13209	1.10383	1.40619	1.21404		2.8512	1.81492	1.96816	2.21143		2.66301	2.33819	2.8047	2.60197
LcbHLH35	135.597	127.109	129.501	130.736		98.1607	101.054	93.9621	97.7257		99.3786	100.35	87.2456	95.6581		107.705	106.546	105.84	106.697		103.298	101.598	103.878	102.925		91.1033	92.6346	88.2714	90.6698		83.0346	91.0231	79.9175	84.6584		100.523	92.2875	88.7042	93.8382		78.7923	85.3809	90.1518	84.775		88.7576	86.4291	102.388	92.525
LcbHLH36	0	0	0	0		0.113713	0	0.338793	0.150835		0	0.0612152	0.0501031	0.0371061		0.669559	0.10926	0.170966	0.316595		0.116849	0	0.0938875	0.0702455		0.1281	0.241346	0.100811	0.156752		0.321598	0.217631	0.122992	0.220741		2.40836	2.69012	2.51187	2.53678		2.95923	0.616683	1.0439	1.53994		0.548394	0.181596	0.198025	0.309338
LcbHLH39	6.52404	6.57472	5.24099	6.11325		2.27607	1.43303	1.89875	1.86929		1.28525	1.37232	0.36103	1.0062		33.7191	37.9215	43.8934	38.5114		49.1158	53.9055	39.3139	47.4451		13.8971	14.3957	15.8601	14.7177		13.4321	11.1516	16.1495	13.5777		24.3706	18.8459	17.619	20.2785		42.1956	44.8207	44.558	43.8581		10.0546	8.68722	9.59206	9.44463
LcbHLH40	0.844551	1.27945	1.42222	1.18207		0.194117	0.0954826	0.0578348	0.115812		2.79745	3.81423	1.41125	2.67431		0.742946	0.279773	0.583706	0.535475		0.44881	0.122532	0.400685	0.324009		0.765371	0.926997	0.81744	0.836603		0.320247	0.278636	0.734853	0.444579		0.913615	0.662346	1.21182	0.92926		0.420971	0.409395	0.612572	0.480979		2.19996	3.37125	2.74662	2.77261
LcbHLH41	7.36421	7.44802	7.23791	7.35005		0.835401	0.54789	0.663725	0.682338		2.07476	2.24861	1.67684	2.00007		4.26311	4.1918	4.09367	4.18286		3.71991	2.16789	2.68237	2.85672		8.31302	8.07732	6.25408	7.54814		2.93143	3.02004	3.61429	3.18859		6.3346	8.44581	6.0175	6.93264		3.27828	4.19492	3.72804	3.73375		1.29818	2.96469	1.45481	1.90589
LcbHLH43	37.4204	70.9053	51.4756	53.2671		21.2249	24.1187	25.4704	23.6047		292.061	142.138	219.424	217.874		48.7753	54.1	59.3907	54.0887		77.5983	76.2305	64.4186	72.7491		23.0248	20.0736	28.8349	23.9777		84.3442	89.2832	83.0064	85.5446		46.0166	51.3208	31.3794	42.9056		112.272	96.6916	107.347	105.437		108.047	103.609	103.614	105.09
LcbHLH44	0.13357	0	0	0.0445235		0	0	0	0		0	0	0	0		0.384138	1.00295	0.784689	0.723925		0.0670384	0.329444	0.10773	0.168071		1.91082	1.86927	0.983229	1.58778		0.307511	0.187289	0.282251	0.259017		2.68667	1.54337	1.69173	1.97393		1.69776	1.65108	1.27267	1.5405		0.566322	1.56277	0.965689	1.03159
LcbHLH45	2.28542	2.51339	1.5856	2.12814		2.11291	0.705941	0.997723	1.27219		1.68838	1.88859	0.808013	1.46166		1.03285	1.03424	0.719261	0.928784		0.0409658	0.503292	0.296242	0.280167		1.48204	1.56534	1.27235	1.43991		0.563741	0.724839	1.59542	0.961334		3.47117	4.75189	3.17793	3.80033		2.12434	2.40224	2.37886	2.30181		0.730589	0.859482	0.728963	0.773011
LcbHLH46	0.502962	1.20683	0.514242	0.741345		2.52678	2.17503	2.25846	2.32009		1.23856	1.20911	1.14425	1.19731		0.20664	0.269758	0.211054	0.229151		0.108186	0.132914	0.0869269	0.109342		1.34417	1.82487	1.74229	1.63711		0.661679	1.51122	1.25261	1.14184		0.743269	0.957955	1.01115	0.904125		0.391405	0.59211	0.523526	0.502347		0.270793	0.896708	0.427802	0.531768
LcbHLH47	1.20346	0.658808	0.984357	0.948874		1.28009	1.31071	0.965143	1.18531		0.676129	1.49074	0.52949	0.898786		1.35365	1.05425	1.2307	1.21287		0.99326	0.791536	0.625521	0.803439		1.23605	2.19015	1.22749	1.55123		0.418675	0.599983	0.875942	0.631533		2.79721	2.21064	3.8639	2.95725		1.42445	1.79457	1.19913	1.47272		2.01581	2.67007	2.06998	2.25195
LcbHLH51	12.4395	5.35311	9.62612	9.13957		11.1031	4.82855	7.49631	7.80933		3.69994	8.26029	2.93949	4.96657		1.17847	0.686801	0.191055	0.685442		0.0979344	0.0601594	0.157379	0.105158		1.66414	2.52849	1.77434	1.98899		0.80862	0.820812	1.90704	1.17882		3.75667	4.94292	7.68881	5.4628		0.944842	1.09115	1.47643	1.17081		0.413662	1.17955	1.1203	0.904504
LcbHLH53	0	0	0	0		0.279926	0.13769	0	0.139205		0	0	0	0		0.412062	0.268963	0.35072	0.343915		0.287646	0.265044	0.635585	0.396092		0.157671	0.59412	0.0620413	0.271277		0.329864	0	0.378461	0.236108		0.82342	2.54702	2.75567	2.04204		1.04067	0.506027	0.883356	0.810018		0.202496	0.335275	0.487476	0.341749
LcbHLH54	5.08083	1.13784	1.35863	2.52577		0.458142	0.600937	0.454992	0.50469		0.179655	0.164422	0.201862	0.18198		3.77666	5.35577	4.82167	4.65137		3.29544	2.69911	3.02614	3.0069		3.44071	2.83608	2.36927	2.88202		5.54271	3.06888	5.03787	4.54982		0.808593	1.38953	1.9067	1.36827		1.51397	0.368086	0.78859	0.890217		1.17837	0.548729	1.32972	1.01894
LcbHLH55	0.236018	0	0	0.0786726		0	0	0	0		0.452046	2.15132	0.338615	0.980659		0.0905025	0.147683	0.308119	0.182102		0.157942	0	0.25381	0.137251		0.0865746	0.163111	0.0681316	0.105939		0.434695	0.294166	0.166245	0.298369		0.0904252	0.209779	0.295237	0.19848		0	0.092617	0	0.0308723		1.186	2.08639	1.94057	1.73765
LcbHLH56	2.02787	2.06426	2.11104	2.06772		2.73727	1.38184	2.4466	2.18857		3.72862	3.25734	3.20561	3.39719		9.33118	14.2232	14.9095	12.8213		17.8759	18.2332	14.1847	16.7646		30.4302	33.5965	35.251	33.0926		25.7708	26.8143	29.2558	27.2803		22.4605	19.5972	15.2893	19.1157		41.1961	41.322	42.3631	41.6271		23.1362	22.173	18.9418	21.417
LcbHLH57	3.81955	1.24743	2.31872	2.4619		3.88659	3.5176	4.26128	3.88849		1.00589	0.9206	1.06173	0.996075		13.5021	14.1533	12.5439	13.3997		19.8491	15.7502	18.8046	18.1346		8.18746	9.03262	9.99226	9.07078		12.1643	11.6411	12.0647	11.9567		11.204	11.0688	7.31618	9.863		12.5707	14.7075	12.6216	13.2999		5.62306	6.424	5.38078	5.80928
LcbHLH58	0	0	0.0373572	0.0124524		0.107076	0.140449	0.467894	0.238473		0	0.0768564	0.0314525	0.036103		0.042032	0.377236	0.107325	0.175531		0.476792	0.315415	0.324161	0.372123		0.241246	0.265136	0.158211	0.221531		0.067295	0.239084	0.77209	0.35949		0.0839922	0.292282	0.788421	0.388232		0.176921	0.387126	1.4335	0.66585		3.16717	2.10896	2.54838	2.60817
LcbHLH59	0.0347283	0.0388868	0.0355072	0.0363741		0.373168	0	0.242576	0.205248		0	0	0.0597897	0.0199299		0.279653	0.423745	0.340032	0.34781		0.732059	0.38545	0.588205	0.568571		0.917196	0.468011	0.240602	0.541936		0.607641	0.357097	0.403619	0.456119		0.918074	1.4199	1.04261	1.12686		0.546518	0.122651	0.311431	0.326867		0.39265	0.487585	0.443081	0.441105
LcbHLH60	0.422535	0.094626	0.172804	0.229988		0.288927	0.203025	0.0491897	0.180381		0.0485569	0.222198	0	0.0902516		0.437464	0.317271	0.496454	0.417063		0.593791	0.937943	0.715661	0.749132		2.92934	2.80331	1.75642	2.49636		1.63426	1.89589	2.99111	2.17375		1.35984	1.38957	1.50638	1.41859		0.71609	0.596913	0.757827	0.690276		0.995275	1.38422	0.826605	1.0687
LcbHLH68	0	0	0	0		0	0	0	0		0	0	0	0		2.8207	2.82747	1.92064	2.52294		0	0.0863961	0.0565039	0.0476333		2.08153	7.48029	0.364023	3.30862		0	0.851344	0.296079	0.382474		13.6083	15.5049	18.732	15.9484		2.20497	1.23712	1.96327	1.80179		5.74265	3.77047	3.45612	4.32308
LcbHLH69	0.532089	0.521328	0	0.351139		0.0649714	0	0	0.0216571		8.56055	7.31001	0.0858812	5.31881		0.0382562	0.0936404	0.0651224	0.065673		0.166908	0.369104	0.321863	0.285958		1.50043	2.24082	2.27519	2.00548		2.57249	1.46107	2.07306	2.03554		0	0.266026	0	0.0886753		0.040257	0	0.149112	0.0631229		1.09666	0.985694	1.44259	1.17498
LcbHLH70	24.5382	21.7014	21.7516	22.6637		20.4277	17.6566	19.5602	19.2148		19.1696	18.0951	16.1283	17.7977		13.3955	9.9084	13.2951	12.1997		15.167	15.4038	15.4688	15.3465		12.6368	15.2039	13.8529	13.8979		14.9163	16.1581	15.3683	15.4809		15.3292	14.3252	13.3818	14.3454		18.3884	16.4122	15.7178	16.8395		14.1224	14.3627	14.2569	14.2473
LcbHLH71	2.47219	5.49317	3.43599	3.80045		0.301869	0.296967	0.224845	0.27456		5.5932	2.43759	1.59608	3.20896		43.281	50.7945	54.1602	49.4119		90.1115	109.946	97.1411	99.0661		43.613	47.5715	63.4591	51.5478		64.03	64.5983	85.7069	71.4451		24.7743	30.3851	19.5696	24.9097		67.6155	60.2993	60.5335	62.8161		43.7104	35.7339	45.3078	41.584
LcbHLH74	3.26855	0.228746	0.765841	1.42104		0.864738	0.916134	0.634184	0.805019		0.391267	1.71883	0.586173	0.898756		0.0783341	0.319567	0.800075	0.399325		1.2987	0.83976	1.53779	1.22542		2.32296	2.54124	2.06399	2.3094		2.06937	1.90961	3.66927	2.54941		1.95668	0.96839	2.04433	1.65647		1.64862	0.721479	1.45029	1.27346		0.128317	0.531139	0.63711	0.432188
LcbHLH75	4.76018	3.31879	3.76498	3.94798		1.05282	0.517864	0.836467	0.802385		0.412854	1.03908	1.00508	0.819005		20.354	34.3942	28.5803	27.7762		20.0144	17.2788	14.85	17.3811		30.2437	26.442	26.4455	27.7104		23.655	15.1122	18.979	19.2487		17.2397	19.0793	16.5155	17.6115		8.58917	9.93899	8.96034	9.16283		15.2321	21.7872	21.3901	19.4698
LcbHLH76	0.169603	0	0.0867035	0.0854357		14.0825	12.1425	10.662	12.2957		0.292358	2.85405	1.24098	1.46246		0	0.0795944	0.166062	0.0818855		2.80906	6.48392	4.37734	4.55678		0.466597	0	0.220319	0.228972		21.0852	44.3125	15.3213	26.9063		11.0141	2.0351	0.0795596	4.37625		54.202	7.48744	31.6546	31.1147		8.70907	4.76246	6.131	6.53418
LcbHLH77	4.36783	3.81634	3.28167	3.82195		2.06871	1.93972	2.38833	2.13225		3.19418	2.88853	2.3357	2.80614		4.64396	4.65865	5.31338	4.872		9.13413	8.69186	6.45851	8.09484		2.73099	3.77323	5.04347	3.84923		3.19956	3.68085	3.39124	3.42388		10.6492	9.88206	8.35087	9.62737		8.89245	8.10256	10.6454	9.21346		4.08417	5.16197	4.72834	4.65816
LcbHLH78	68.3882	99.6753	80.9395	83.001		20.6768	18.5659	18.7724	19.3384		118.218	73.6265	99.9828	97.2756		40.4648	47.5004	47.5165	45.1606		48.6752	44.6607	46.9943	46.7767		50.3127	53.6992	66.5575	56.8565		73.4334	69.1444	85.5123	76.03		138.454	144.694	143.739	142.296		118.24	118.477	126.53	121.082		52.5416	61.1175	56.7938	56.8177
LcbHLH79	72.4289	104.698	73.4903	83.5391		17.358	19.2888	19.5209	18.7226		104.575	77.4924	84.1938	88.7536		40.0765	45.8064	51.9009	45.9279		51.7014	53.8889	48.647	51.4124		50.6755	48.2046	61.1206	53.3336		59.1859	62.0435	67.7467	62.9921		22.7827	22.6008	22.447	22.6102		14.4817	17.5601	19.7503	17.264		40.0398	48.2956	47.5985	45.3113
LcbHLH80	2.56745	1.98134	2.16388	2.23756		5.82943	4.4011	4.03908	4.75654		3.22957	2.77327	3.61383	3.20556		2.39474	2.37723	3.12532	2.63243		5.08471	4.23591	3.27403	4.19822		9.43049	9.35131	10.937	9.90626		7.12501	7.68649	7.84476	7.55209		5.62284	4.74906	5.27319	5.21503		7.05597	5.10561	6.30047	6.15402		5.85146	5.27715	7.17108	6.0999
LcbHLH81	0.0586721	0	0.479904	0.179525		55.3652	47.7565	39.6161	47.5793		1.28108	12.8352	4.74758	6.28795		0	0	0.172341	0.057447		0.883418	1.8089	1.27768	1.32333		1.80783	0.729864	0.914597	1.15076		66.3499	140.734	56.0397	87.7078		2.42773	0.0521493	0	0.826627		9.16218	1.934	4.47227	5.18949		27.972	13.2259	18.9138	20.0372
LcbHLH84	68.7907	73.6656	78.7413	73.7325		83.5815	79.0268	84.9014	82.5032		99.5391	73.4024	72.3031	81.7482		13.1321	15.2593	17.9576	15.4497		23.6236	25.9874	22.1886	23.9332		24.4693	25.7147	29.6814	26.6218		19.5552	26.6522	19.8353	22.0142		15.3906	12.4065	12.9939	13.597		25.2145	21.6869	23.6519	23.5178		22.0975	20.2558	25.7467	22.7
LcbHLH92	11.1924	10.5328	9.92171	10.549		14.8298	8.69617	16.7724	13.4328		7.59415	10.8949	7.89223	8.79376		4.38313	4.86143	3.9638	4.40279		3.46608	3.01018	2.83299	3.10308		3.21019	9.87452	9.02257	7.36909		2.74124	4.06256	4.84343	3.88241		2.18969	2.64578	4.30076	3.04541		1.94584	3.01372	2.4692	2.47625		4.93617	4.73654	4.75995	4.81089
LcbHLH94	14.5984	17.7435	13.3311	15.2244		1.21884	1.43886	1.08941	1.24904		5.80714	6.43017	5.63884	5.95872		27.5586	38.7636	32.3132	32.8785		16.7829	16.5413	15.7995	16.3746		7.2085	6.46722	5.56482	6.41351		3.73432	4.78203	5.33911	4.61849		7.24229	8.53937	6.43827	7.40664		4.68228	4.48008	3.42667	4.19634		16.7523	17.4694	16.9273	17.0496
LcbHLH98	1.00065	1.25229	1.324	1.19231		1.03498	0.452521	0.411145	0.632882		1.48814	1.23814	0.506692	1.07766		5.417	5.24847	5.59035	5.41861		2.95423	3.99242	3.56056	3.50241		5.44099	4.45434	4.43482	4.77672		2.81868	3.79656	2.54983	3.05502		5.68299	4.29005	4.5835	4.85218		3.06392	3.67261	3.29905	3.34519		5.26861	4.95849	4.25558	4.82756
LcbHLH99	0	0.149565	0	0.0498548		0	0.192539	0	0.0641797		0.306994	0.210722	0	0.172572		0.0768277	0.438789	0.196172	0.237263		0.0670384	0.164722	0.161595	0.131118		0.0734933	0.553859	0.404859	0.34407		0.184507	0.124859	0.352814	0.220727		1.30496	0.831046	1.06517	1.06706		1.051	1.10072	1.04808	1.0666		1.88774	1.25022	1.36333	1.50043
LcbHLH100	2.05623	1.73431	1.31055	1.70037		0.391291	0.2053	0.217616	0.271403		1.59578	1.68516	1.03444	1.43846		11.5506	16.7932	15.4266	14.5901		17.9865	17.7505	19.3197	18.3522		7.72866	8.00033	9.20428	8.31109		7.57429	6.59014	8.04122	7.40188		14.9478	19.2969	17.9383	17.3944		20.2364	19.9314	19.6369	19.9349		16.7318	21.1001	17.3987	18.4102
LcbHLH101	3.03251	2.95031	2.23644	2.73975		1.31119	1.00325	1.38898	1.23447		1.31398	0.836567	0.770296	0.973615		19.4442	25.0101	22.342	22.2654		27.9949	25.5653	27.0246	26.8616		30.1981	29.2718	31.6866	30.3855		32.8706	25.745	32.4606	30.3587		29.027	35.1283	29.4766	31.2106		35.145	33.6518	33.1572	33.9846		18.6422	23.7699	21.4382	21.2834
LcbHLH102	2.45992	2.18738	1.33152	1.99294		2.0496	3.33735	3.45333	2.94676		10.0604	8.14205	12.4562	10.2196		3.41243	7.46987	4.2504	5.04423		5.30162	3.47976	4.37653	4.38597		4.53821	2.32505	3.07018	3.31115		4.79717	2.57002	2.59906	3.32208		2.24529	2.50798	3.19028	2.64785		1.051	1.27762	0.811017	1.04654		1.56787	1.46727	1.47694	1.50403
LcbHLH103	0.59656	0.834992	0.228727	0.553426		0.218531	0.358304	0.173623	0.250153		0.771251	2.19599	1.79736	1.5882		1.11518	2.3097	2.33641	1.92043		1.4222	1.37942	1.62388	1.47517		0.98472	1.08223	0.322894	0.796616		1.71678	0.20912	0.787879	0.904593		1.02852	0.927917	0.489722	0.815386		0.812426	0.438936	0.668716	0.640026		3.16168	3.31538	2.98105	3.1527
LcbHLH104	1.22777	0.756132	1.75742	1.24711		1.01944	0.884902	0.643193	0.849179		0.634919	0.774775	0	0.469898		0.918052	1.26761	0.961706	1.04912		0.431348	0.529939	0.643659	0.534982		2.09419	2.99098	2.02021	2.36846		1.30024	1.492	2.01068	1.60098		3.24572	3.54664	2.82209	3.20481		1.04038	0.505885	0.619322	0.721862		1.67736	0.766127	1.09651	1.18
LcbHLH105	0.636475	0.178172	0.0542291	0.289626		0.725364	0.356793	0.617465	0.566541		0.121904	0.502054	0.136973	0.253644		0.793197	0.497827	0.207729	0.499584		0.212963	0.261639	0.427786	0.300796		0.642037	1.42956	0.964595	1.01206		0.928034	1.18993	0.952675	1.02355		3.77971	3.34715	4.62776	3.91821		1.09151	0.811729	0.951279	0.951505		0.599684	0.537821	1.03761	0.72504
LcbHLH106	6.99818	6.31642	6.72148	6.67869		8.51413	9.06877	8.86293	8.81528		4.94716	8.00706	4.89235	5.94886		2.75668	2.90604	2.80311	2.82194		2.59701	1.93528	2.71953	2.41727		6.41757	5.89162	5.52793	5.94571		4.19874	4.02417	4.79491	4.33927		0.0243746	0.131943	0.198957	0.118425		0.128357	0.0748962	0.0950864	0.0994464		3.23688	3.20898	3.55341	3.33309
LcbHLH107	18.1406	17.6164	15.7337	17.1636		11.0894	11.284	10.9731	11.1155		9.5142	10.3959	9.21945	9.70984		7.65087	6.09172	7.38767	7.04342		5.70914	5.74134	5.80806	5.75285		9.64065	9.50966	9.73189	9.6274		5.99797	4.80213	7.68123	6.16044		13.8389	13.1682	16.8686	14.6252		9.32808	8.5046	9.15195	8.99488		4.21358	3.72078	3.82331	3.91922
LcbHLH108	1.03133	0.494923	0.376591	0.63428		0.503725	0.778714	0.514554	0.598998		0.169312	0.542342	0	0.237218		3.22024	3.66456	3.82278	3.56919		2.36625	2.7254	2.13893	2.41019		8.02546	6.87289	6.63478	7.17771		2.64571	4.88918	2.87982	3.47157		3.64085	5.23811	6.84212	5.24036		1.60516	0.520339	1.48637	1.20396		4.3727	3.84979	3.82213	4.01487
LcbHLH109	47.7406	52.5917	51.1356	50.4893		41.4389	39.6299	43.8799	41.6496		53.6087	45.9547	48.8456	49.4697		115.906	105.835	109.559	110.433		154.901	157.616	159.373	157.297		78.2533	77.817	87.9251	81.3318		80.0146	100.602	86.6624	89.093		136.449	122.975	114.832	124.752		152.735	166.199	159.526	159.487		89.8763	88.1291	93.4337	90.4797
LcbHLH110	21.5058	9.66514	4.11342	11.7614		7.14555	5.34243	4.08753	5.52517		11.0121	10.3091	3.08543	8.13552		6.81601	8.71945	8.45134	7.9956		9.83911	9.02089	6.54872	8.46958		5.47374	2.19905	3.54749	3.74009		7.94877	8.68403	6.41478	7.68252		6.55796	5.4614	4.25488	5.42475		5.9328	5.16686	4.26382	5.12116		3.85955	1.08407	7.77725	4.24029
LcbHLH111	20.6791	19.0373	19.7662	19.8275		20.3181	22.5181	20.7984	21.2116		9.30701	10.2298	9.34162	9.62616		7.02792	5.97934	6.98522	6.66416		10.873	9.98764	9.7575	10.206		7.93922	8.83305	8.52781	8.43336		10.3822	12.6427	13.0795	12.0348		9.37796	8.35947	8.16379	8.63374		11.3852	10.2914	11.0157	10.8974		4.69579	6.03491	5.21343	5.31471
LcbHLH112	1.40183	0.344566	0.908903	0.885101		3.13955	2.13571	2.90568	2.72698		0.471501	0.61132	0.117729	0.400183		0.353991	0.288823	0.669542	0.437452		0.0343206	0.0421652	0.220611	0.0990324		4.96653	4.21782	2.16153	3.78196		0.094459	0.383533	0.975375	0.484456		0.275091	0.12156	0.0962324	0.164294		0.124168	0.120754	0.0383266	0.0944162		0.128858	0.080007	0.145409	0.118091
LcbHLH113	20.2154	13.9697	17.5586	17.2479		20.0483	20.2778	18.0203	19.4488		31.2404	56.4538	30.1632	39.2858		27.2418	22.5159	23.1864	24.3147		33.047	31.1508	34.255	32.8176		40.6358	36.3639	29.8116	35.6038		31.3462	30.2711	29.4956	30.371		31.0247	37.9552	32.874	33.9513		46.286	57.6604	72.341	58.7625		61.9658	62.5014	78.7673	67.7448
LcbHLH114	6.14645	3.76427	5.28393	5.06488		13.0376	19.4317	15.3039	15.9244		4.92996	10.0529	8.91909	7.96731		10.9379	12.1032	11.8643	11.6351		12.8431	14.7267	14.2246	13.9315		14.135	15.7081	11.428	13.757		10.997	19.4412	11.8749	14.1044		8.16039	14.8731	7.90833	10.3139		18.5557	20.6739	20.8103	20.0133		23.9446	19.5291	22.5976	22.0238
LcbHLH115	0.967904	0.329853	0.645398	0.647719		0.657737	1.17279	0.440919	0.757148		0.773773	2.08022	0.434708	1.09623		18.0572	22.2377	18.9539	19.7496		23.191	17.1262	18.7357	19.6843		20.0984	17.5372	16.2906	17.9754		19.6482	25.7665	22.1426	22.5191		12.1891	18.1411	12.4761	14.2688		19.562	18.9745	15.2368	17.9244		81.838	77.4003	66.6488	75.2957
LcbHLH116	0.625046	0.524918	0.821653	0.657206		0.0872251	0.171617	0.233888	0.164244		1.84704	1.12694	1.74867	1.57422		7.1133	6.20188	7.97779	7.09765		12.0777	8.12115	11.3788	10.5259		4.24979	4.37366	5.70297	4.77547		2.11739	5.44633	4.90583	4.15652		3.74605	4.64287	2.01054	3.46649		6.75571	3.62661	5.9555	5.44594		5.06888	4.84053	4.68985	4.86642
LcbHLH117	1.5138	0.947242	0.500742	0.987261		3.74038	6.54633	3.62827	4.63832		1.6373	3.69934	1.41809	2.25157		41.5382	43.4193	38.2318	41.0631		41.5638	35.7996	29.2307	35.5314		111.22	101.679	88.6063	100.502		115.665	131.144	103.257	116.689		56.0363	86.8641	56.2658	66.3887		81.7082	76.5785	79.6544	79.3137		83.3123	79.1458	73.9225	78.7935
LcbHLH118	1.82792	1.62695	1.58139	1.67875		0.0915695	0.0900826	0	0.0605507		3.71648	4.09147	2.82425	3.54407		2.21062	2.81547	2.0651	2.36373		2.30533	3.29465	3.1754	2.92513		7.83979	6.80222	9.61982	8.08727		2.93503	3.15454	4.06072	3.38343		0.915817	1.16646	0.791505	0.957926		1.58865	1.65532	0.840623	1.36153		3.26788	2.88812	7.41505	4.52368
LcbHLH119	0.998412	0.660615	0.928003	0.862344		0.310322	0.436119	0.422658	0.3897		2.50333	1.00234	1.99237	1.83268		1.67061	2.81131	1.9107	2.13087		2.50549	2.74236	2.56219	2.60335		27.8169	26.1572	30.4589	28.1443		10.9078	8.56935	12.9463	10.8078		2.81674	3.18663	2.29916	2.76751		3.90052	4.64808	3.15403	3.90088		2.6083	2.79646	5.01809	3.47428
LcbHLH126	4.05915	2.80288	3.25098	3.371		31.3249	26.9155	28.1167	28.7857		3.10981	4.26917	5.70719	4.36206		9.806	11.6837	13.9766	11.8221		20.2369	17.8542	21.3893	19.8268		23.8977	20.5485	18.924	21.1234		19.0018	37.2485	19.7997	25.35		18.4289	18.761	17.5813	18.2571		27.7627	24.8488	36.0976	29.5697		46.9141	32.4001	34.9286	38.0809
LcbHLH127	2.4583	1.37633	0.907627	1.58075		0	0.196866	0	0.065622		1.64794	1.72366	1.99859	1.79006		0.942649	1.02549	1.20348	1.05721		2.53616	2.77899	2.86392	2.72636		0	0	0	0		0	0	0	0		0	0.364166	0	0.121389		0.0826626	0	0	0.0275542		1.28678	1.86421	1.16163	1.43754
LcbHLH130	0.078928	0.088379	0.0806981	0.0826684		3.31533	4.85432	3.30785	3.82583		2.26757	5.81081	6.59045	4.88961		4.26743	3.77815	4.6368	4.22746		7.44736	7.49486	6.55683	7.16635		3.21366	3.10916	3.6227	3.31517		2.98006	5.2384	4.25301	4.15716		18.053	19.1518	13.6991	16.968		36.8804	42.8351	52.1115	43.9423		66.2597	41.6171	41.4885	49.7884
LcbHLH133	1.89749	1.38567	1.26524	1.51613		0.161179	0	0	0.0537263		0.853262	1.82212	0.426103	1.03383		0	0	0	0		0	0	0	0		0	0	0	0		0	0	0	0		0	0	0	0		0	0	0	0		0	0	0	0
LcbHLH134	2.09603	1.17351	2.33213	1.86722		2.70993	1.77728	1.22005	1.90242		1.34605	0.778049	0.689881	0.937993		13.8999	16.8958	17.9875	16.2611		14.0471	14.6729	16.5075	15.0759		28.2893	24.6041	18.579	23.8241		15.6689	17.1729	15.2416	16.0278		14.1715	19.8355	17.3511	17.1194		21.6418	16.9099	18.1745	18.9087		15.7409	18.6571	15.2063	16.5348
LcbHLH135	0.752667	1.06458	0.445527	0.754258		10.4095	8.56543	8.02436	8.99976		14.2034	12.9157	8.72974	11.9496		0.410137	0.371815	0.543017	0.441656		0.675992	0.48853	0.0958509	0.420124		19.4425	17.9867	14.3744	17.2679		8.53641	8.55403	7.492	8.19415		14.1149	11.2672	13.0822	12.8214		8.20016	8.6742	9.99124	8.9552		14.3325	17.3961	15.2635	15.664
LcbHLH136	40.1735	56.5549	43.2454	46.6579		11.2006	9.93042	10.0524	10.3945		16.918	11.9401	10.6988	13.1856		19.0524	17.3519	20.0138	18.8061		19.6372	18.5393	18.9066	19.0277		19.6898	18.0787	17.898	18.5555		10.3765	10.5594	8.46524	9.80038		14.4805	13.4877	12.9883	13.6522		7.95101	9.86544	9.71105	9.17583		9.36279	12.9404	12.1847	11.496
LcbHLH137	15.2643	11.346	12.094	12.9015		7.30678	4.8896	5.97398	6.05679		13.0437	15.5052	9.95781	12.8356		3.8521	4.48994	5.70572	4.68259		4.40894	5.79209	5.0157	5.07225		4.30705	3.78685	3.38952	3.8278		2.56307	3.86192	2.80282	3.07594		3.84881	3.78802	4.07998	3.90561		2.79012	3.32775	2.68114	2.93301		8.52264	7.59823	9.72823	8.61636
LcbHLH138	79.1588	72.1207	76.4877	75.9224		135.306	128.083	118.835	127.408		65.2375	71.4491	57.518	64.7349		59.7614	62.9905	62.7182	61.8234		55.0372	57.3982	63.0389	58.4914		69.6489	71.9466	71.6062	71.0672		100.984	98.7712	105.865	101.873		91.7946	79.7081	85.9538	85.8188		78.751	88.6233	82.9363	83.4369		47.8948	41.3459	48.2355	45.8254
LcbHLH139	58.6029	58.8694	59.1218	58.8647		14.5015	14.4529	13.1314	14.0286		65.632	67.9756	51.0046	61.5374		42.9546	43.7479	44.1769	43.6265		43.5982	43.8899	42.1939	43.2273		12.056	8.33299	10.6105	10.3332		11.5217	8.78675	12.3287	10.8791		12.8903	10.6019	12.103	11.8651		9.1815	9.00534	10.1734	9.45341		61.3232	53.6488	62.5276	59.1665
LcbHLH140	128.968	208.87	135.838	157.892		48.392	45.9499	46.7216	47.0212		230.603	153.561	227.59	203.918		4.58849	5.96232	5.93047	5.49376		12.0609	10.263	10.5647	10.9629		4.17259	3.57334	3.92339	3.88977		6.30337	5.9381	6.03534	6.09227		0.282999	0.437688	0.369595	0.363427		0.119222	0.463773	0.331197	0.304731		7.98026	7.68196	7.07852	7.58025
LcbHLH141	203.941	349.632	216.679	256.75		68.8034	67.8061	60.9344	65.848		167.403	121.255	146.825	145.161		7.32025	9.66162	8.9182	8.63336		17.3465	13.7716	24.0515	18.3899		8.85616	6.07918	6.15912	7.03149		7.7559	8.33939	7.64614	7.91381		21.4401	21.9584	24.4654	22.6213		41.4608	29.8917	34.8961	35.4162		9.1109	13.1385	14.5925	12.2806
LcbHLH145	13.2119	9.17221	12.3735	11.5858		0.154872	0.203143	0	0.119338		8.44166	17.4526	2.866	9.58677		0.425558	0.297614	0.155232	0.292801		0.371334	0.325863	0.340989	0.346062		0.0581555	0.0547839	0	0.0376465		0.0486669	0.0494007	0	0.0326892		0.0607422	0	0.0495806	0.0367742		0.0639737	0	0	0.0213246		0.647304	0.247326	0.539403	0.478011
LcbHLH146	19.1865	29.3867	23.786	24.1197		2.91093	3.51677	3.22565	3.21778		18.7444	10.282	14.3109	14.4458		14.8547	14.7697	11.6196	13.748		18.9443	16.0535	13.4507	16.1495		9.31989	9.70087	7.8325	8.95109		3.61077	4.496	3.92178	4.00952		15.5631	15.52	14.7633	15.2821		20.5679	16.1249	16.9361	17.8763		9.45738	10.1537	10.9389	10.1833
LcbHLH147	12.7707	11.332	12.5917	12.2315		32.5345	98.3084	35.6561	55.4997		21.8446	37.7037	29.5228	29.6904		23.9306	25.8576	23.5663	24.4515		25.262	21.362	18.9374	21.8538		64.6987	57.7005	52.7244	58.3745		51.4798	104.061	77.2809	77.6074		38.1886	65.7259	30.8448	44.9198		125.619	167.047	176.076	156.247		46.8182	48.9286	51.67	49.1389
LcbHLH148	3.77945	5.79943	7.65687	5.74525		1.02554	1.14341	0.814793	0.994582		57.9104	31.3583	54.0431	47.7706		6.03857	4.33568	4.04318	4.80581		6.04195	8.19975	6.83041	7.02403		1.30934	1.95897	1.21225	1.49352		0.19336	0.523401	0.443692	0.386818		12.7104	11.1354	9.65251	11.1661		15.0811	13.6776	14.4358	14.3982		9.62784	11.0822	10.1798	10.2966
LcbHLH149	3.18729	3.11526	3.89395	3.39883		3.82591	14.2505	4.55952	7.5453		27.626	55.7089	48.1074	43.8141		4.59873	4.96905	5.52741	5.03173		5.17864	4.63016	4.85814	4.88898		7.40126	7.05616	6.97077	7.14273		5.12409	13.5841	9.90294	9.53705		4.59481	9.43515	4.40937	6.14644		17.4932	24.6438	24.2224	22.1198		47.5652	52.0603	61.1812	53.6022
LcbHLH156	8.6588	3.284	6.02575	5.98952		5.94813	4.4826	4.61739	5.01604		3.20985	3.64272	2.13992	2.9975		9.89656	9.96225	8.88823	9.58235		7.09349	7.61255	8.04248	7.58284		10.4506	11.0029	9.21608	10.2232		3.65254	4.67368	4.07259	4.13294		10.0486	10.1788	10.0103	10.0792		5.57901	6.3463	5.76105	5.89546		6.42136	7.3421	7.76876	7.17741
LcbHLH157	2.45862	0.704261	2.19223	1.78504		1.22878	1.09893	0.898604	1.07544		1.64268	2.91657	1.10743	1.88889		2.63099	3.62246	3.58293	3.2788		3.21406	2.78523	1.79851	2.59927		3.33477	2.60798	1.75783	2.56686		0.63185	0.935341	0.906169	0.824454		5.75038	6.27634	5.01559	5.68077		3.14928	2.72612	3.26874	3.04805		5.3064	5.46327	5.6171	5.46226

## Sheet: TableS10
Table S10. qPCR data of period I and II of XNFJ
Target	Sample	Biological Set Name	Cq	Cq Mean	Cq Std. Dev
Actin	XLFJ-I		20.1625	20.4936	0.300195
Actin	XLFJ-I		20.5704	20.4936	0.300195
Actin	XLFJ-I		20.748	20.4936	0.300195
LcbHLH4	XLFJ-I		18.827	18.7336	0.113509
LcbHLH4	XLFJ-I		18.7665	18.7336	0.113509
LcbHLH4	XLFJ-I		18.6072	18.7336	0.113509
LcbHLH156	XLFJ-I		23.3863	23.4527	0.0733585
LcbHLH156	XLFJ-I		23.4404	23.4527	0.0733585
LcbHLH156	XLFJ-I		23.5314	23.4527	0.0733585
LcbHLH157	XLFJ-I		24.0275	23.9626	0.064967
LcbHLH157	XLFJ-I		23.8976	23.9626	0.064967
LcbHLH157	XLFJ-I		23.9626	23.9626	0.064967
LcbHLH114	XLFJ-I		22.4634	22.4802	0.0311625
LcbHLH114	XLFJ-I		22.4611	22.4802	0.0311625
LcbHLH114	XLFJ-I		22.5162	22.4802	0.0311625
LcbHLH117	XLFJ-I		19.4898	19.7296	0.210439
LcbHLH117	XLFJ-I		19.815	19.7296	0.210439
LcbHLH117	XLFJ-I		19.8839	19.7296	0.210439
LcbHLH149	XLFJ-I		19.2514	19.2736	0.0229667
LcbHLH149	XLFJ-I		19.2973	19.2736	0.0229667
LcbHLH149	XLFJ-I		19.2722	19.2736	0.0229667
Actin	XLFJII		20.4163	20.2714	0.131152
Actin	XLFJII		20.2369	20.2714	0.131152
Actin	XLFJII		20.1609	20.2714	0.131152
LcbHLH4	XLFJII		26.2257	26.2647	0.119756
LcbHLH4	XLFJII		26.1693	26.2647	0.119756
LcbHLH4	XLFJII		26.3991	26.2647	0.119756
LcbHLH156	XLFJII		30.0208	30.4908	0.453881
LcbHLH156	XLFJII		30.5248	30.4908	0.453881
LcbHLH156	XLFJII		30.9266	30.4908	0.453881
LcbHLH157	XLFJII		29.6977	29.8288	0.11355
LcbHLH157	XLFJII		29.8951	29.8288	0.11355
LcbHLH157	XLFJII		29.8936	29.8288	0.11355
LcbHLH114	XLFJII		29.0118	28.9218	0.141068
LcbHLH114	XLFJII		28.9944	28.9218	0.141068
LcbHLH114	XLFJII		28.7592	28.9218	0.141068
LcbHLH117	XLFJII		25.2407	25.2138	0.0251571
LcbHLH117	XLFJII		25.1909	25.2138	0.0251571
LcbHLH117	XLFJII		25.2098	25.2138	0.0251571
LcbHLH149	XLFJII		26.4498	26.4981	0.0976144
LcbHLH149	XLFJII		26.434	26.4981	0.0976144
LcbHLH149	XLFJII		26.6104	26.4981	0.0976144

[truncated: 3 more sheets: TableS11, TableS12, TableS13]
